# Supplementary material for: SARS-CoV-2 Variant of Concern 202012/01 Has about Twofold Replicative Advantage and Acquires Concerning Mutations
Source: MDPI journal article supplement (doi:10.3390/v13030392), 2021-03-01
Supplement: s1 [file s1]

# SARS-CoV-2 Variant of Concern 202012/01 has about twofold replicative advantage and is acquiring concerning mutations

Frederic Grabowski<sup>1</sup>, Grzegorz Preibisch<sup>2</sup>, Stanisław Giziński<sup>3</sup>, Marek Kochańczyk<sup>1,\*</sup> and Tomasz Lipniacki<sup>1,\*</sup>

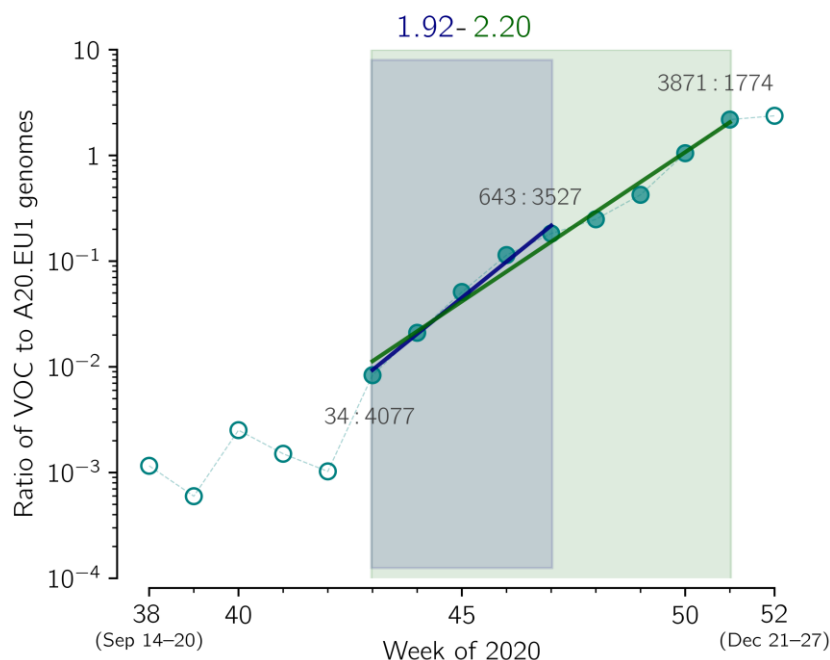

**Figure S1. The replicative advantage of VOC over 20A.EU1 in England, based on COG.** Ratio of VOC to 20A.EU1 genomes collected from pillar 2 tests in weeks 38–51 in England. The trend line is fitted to data points from weeks 43–51 (green) and from weeks 43–47 (blue). The weekly growth rate is 1.92 [95% CI: 1.80–2.04] for weeks 43–51 and 2.20 [95% CI: 1.98–2.43] for weeks 43–47. The estimated R ratio is  $R_{t}^{VOC} / R_{t}^{20A.EU1} = 1.87$  [95% CI: 1.76–1.98] for weeks 43–51 and 2.13 [95% CI: 1.93–2.35] for weeks 43–47.
