# Supplementary material for: SARS-CoV-2 Variant of Concern 202012/01 Has about Twofold Replicative Advantage and Acquires Concerning Mutations
Source: Viruses. 2021 Mar 1;13(3):392. doi: 10.3390/v13030392 (PMC8000749; doi:10.3390/v13030392)
Supplement: Supplementary file 1 [file viruses-13-00392-s001.zip › viruses-1091769--Grabowski_et_al_Data_File_S1.xlsx]

## Sheet: TABLE OF CONTENTS
	This file contains data analyzed in the article:
	SARS-CoV-2 Variant of Concern 202012/01 has about twofold replicative advantage and acquires concerning mutations Frederic Grabowski, Grzegorz Preibisch, Stanisław Giziński, Marek Kochańczyk, and Tomasz Lipniacki Viruses (2021)
	Data sheet	Access date	Data source
	England @ Figures 1, 2, 7 Different closing date @ Figure 2 South Africa @ Figure 4 Mutations by count @ Figures 5, 6 Mutations by ID @ Figures 5, 6	Feb 12, 2021	GISAID Initiative
	Denmark @ Figure 3 Scotland @ Figure 3 Wales @ Figure 3 USA @ Figure 3	Feb 17, 2021	GISAID Initiative
	England COG pillar 2 @ Figure S1	Feb 15, 2021	COG-UK consortium
	Number of positive cases in England, Scotland, Wales: UK government COVID-19 data	Feb 17, 2021	GOV UK COVID-19 data
	Number of positive cases in South Africa, Denmark, USA: ECDC COVID-19 data	Feb 17, 2021	ECDC COVID-19 data

## Sheet: England @ Figs. 1, 2, 7
Year-week	All genomes	VOC genomes	A222V genomes	D614G genomes	VOC L18F genomes	Positive cases	Cases/Genomes
2020-5	3	0	0	0	0	6	0.5000
2020-6	11	0	0	3	0	7	1.5714
2020-7	12	0	0	1	0	1	12.0000
2020-8	5	0	0	1	0	2	2.5000
2020-9	146	0	0	74	0	54	2.7037
2020-10	566	0	0	322	0	365	1.5507
2020-11	1000	0	0	446	0	2222	0.4500
2020-12	1686	0	2	871	0	6382	0.2642
2020-13	3394	0	1	2208	0	16387	0.2071
2020-14	3688	0	1	2846	0	26040	0.1416
2020-15	2986	0	1	2574	0	26882	0.1111
2020-16	2493	0	0	2171	0	27208	0.0916
2020-17	1913	0	1	1714	0	27885	0.0686
2020-18	1578	0	0	1470	0	26654	0.0592
2020-19	1271	0	0	1212	0	18862	0.0674
2020-20	820	0	0	789	0	16569	0.0495
2020-21	597	0	2	581	0	13719	0.0435
2020-22	329	0	0	320	0	9375	0.0351
2020-23	729	0	8	720	0	7456	0.0978
2020-24	2266	0	4	2245	0	6509	0.3481
2020-25	1701	0	2	1673	0	5780	0.2943
2020-26	804	0	0	794	0	4461	0.1802
2020-27	1079	0	3	1072	0	3859	0.2796
2020-28	121	0	0	121	0	3859	0.0314
2020-29	693	0	4	685	0	4130	0.1678
2020-30	444	0	8	444	0	4645	0.0956
2020-31	384	0	12	381	0	5047	0.0761
2020-32	568	0	24	567	0	5836	0.0973
2020-33	884	0	76	883	0	6882	0.1285
2020-34	1056	0	207	1054	0	6766	0.1561
2020-35	1799	0	380	1797	0	8053	0.2234
2020-36	1687	0	385	1680	0	15311	0.1102
2020-37	2481	0	715	2479	0	19200	0.1292
2020-38	2239	1	790	2237	0	26712	0.0838
2020-39	3762	2	1540	3760	0	39977	0.0941
2020-40	2565	3	1140	2562	0	70245	0.0365
2020-41	4730	4	2679	4725	0	91639	0.0516
2020-42	5110	3	3083	5104	0	102127	0.0500
2020-43	6473	30	4030	6443	0	129370	0.0500
2020-44	4936	71	3333	4865	0	130821	0.0377
2020-45	8339	266	5594	8073	0	147185	0.0567
2020-46	8717	641	5806	8076	0	151104	0.0577
2020-47	5545	677	3637	4868	0	113203	0.0490
2020-48	2713	396	1790	2315	0	86872	0.0312
2020-49	2231	519	1337	1706	1	88544	0.0252
2020-50	6857	2894	3123	3955	7	124223	0.0552
2020-51	8705	4928	3048	3756	20	200893	0.0433
2020-52	5265	3251	1624	2001	30	241770	0.0218
2020-53	8307	6384	1596	1914	77	354111	0.0235
2021-1	8417	6755	1381	1647	156	336087	0.0250
2021-2	10155	8378	1499	1754	329	267299	0.0380
2021-3	8734	7873	734	853	233	199839	0.0437
2021-4	10258	9577	552	671	332	145369	0.0706
2021-5	562	534	23	28	1	106086	0.0053
2021-6	0	0	0	0	0	66913	0.0000

## Sheet: Different closing date @ Fig. 2
Last submission date	Weekly growth (weeks 43-47)	Weekly growth (weeks 43-51)
2021-01-01	2.232	1.738
2021-01-08	2.251	1.901
2021-01-15	2.315	1.890
2021-01-22	2.314	1.881
2021-01-29	2.314	1.881
2021-02-05	2.264	1.877
2021-02-12	2.318	1.923

## Sheet: Denmark @ Fig. 3
Year-week	All genomes	VOC genomes	A222V genomes	Positive cases	Cases/Genomes
2020-47	1479	0	526	8349	0.1771
2020-48	1611	3	662	8867	0.1817
2020-49	1907	3	938	11251	0.1695
2020-50	2533	10	1300	19155	0.1322
2020-51	3306	27	1706	24676	0.1340
2020-52	2997	61	1736	18915	0.1584
2020-53	3053	68	1792	15362	0.1987
2021-1	3359	137	1993	14014	0.2397
2021-2	3364	255	1870	7170	0.4692
2021-3	3128	414	1703	5401	0.5792
2021-4	2286	464	1187	3664	0.6239

## Sheet: Scotland @ Fig. 3
Year-week	All genomes	VOC genomes	A222V genomes	Positive cases	Cases/Genomes
2020-46	236	4	181	7824	0.0302
2020-47	192	5	156	6929	0.0277
2020-48	178	6	146	5743	0.0310
2020-49	227	15	183	5608	0.0405
2020-50	332	25	276	6163	0.0539
2020-51	380	116	232	6614	0.0575
2020-52	257	57	172	8286	0.0310
2020-53	267	123	141	15935	0.0168
2021-1	558	335	206	14983	0.0372
2021-2	395	288	100	11360	0.0348
2021-3	315	235	67	9171	0.0343
2021-4	653	538	103	7286	0.0896

## Sheet: Wales @ Fig. 3
Year-week	All genomes	VOC genomes	A222V genomes	Positive cases	Cases/Genomes
2020-46	236	4	181	5716	0.0413
2020-47	192	5	156	6273	0.0306
2020-48	178	6	146	7465	0.0238
2020-49	227	15	183	11495	0.0197
2020-50	332	25	276	18300	0.0181
2020-51	380	116	232	19553	0.0194
2020-52	257	57	172	14398	0.0178
2020-53	267	123	141	15735	0.0170
2021-1	558	335	206	12612	0.0442
2021-2	395	288	100	9153	0.0432
2021-3	315	235	67	6033	0.0522
2021-4	653	538	103	4378	0.1492

## Sheet: USA @ Fig. 3
Year-week	All genomes	VOC genomes	Positive cases	Cases/Genomes
2020-51	2351	8	1588085	0.0015
2020-52	3184	23	1306812	0.0024
2020-53	4101	102	1488563	0.0028
2021-1	6653	127	1782792	0.0037
2021-2	4448	198	1515282	0.0029
2021-3	2529	148	1358783	0.0019
2021-4	3445	133	1024054	0.0034

## Sheet: South Africa @ Fig. 4
Year-week	All genomes	N501Y genomes	Positive cases	Cases/Sequences
2020-40	61	0	10523	0.0058
2020-41	106	2	11182	0.0095
2020-42	76	6	11322	0.0067
2020-43	92	15	12075	0.0076
2020-44	75	17	10955	0.0068
2020-45	114	40	10455	0.0109
2020-46	92	60	13746	0.0067
2020-47	141	71	16655	0.0085
2020-48	111	80	20023	0.0055
2020-49	84	63	26863	0.0031
2020-50	74	61	46399	0.0016
2020-51	121	109	60958	0.0020
2020-52	40	30	89949	0.0004
2020-53	63	53	88877	0.0007
2021-1	63	54	130849	0.0005

## Sheet: Mutations by count @ Figs. 5, 6
Mutation name	First occurrence in B.1.1.7	Number of occurrences in B.1.1.7	First occurrence not in B.1.1.7	Number of occurrences not in B.1.1.7	Domain	Recommendation
D614G	2020-09-20	53672	2020-02-03	105700	-	-
A570D	2020-09-20	53656	2020-12-27	2	-	-
T716I	2020-09-20	53653	2020-04-21	65	-	-
S982A	2020-09-20	53653	2020-11-06	5	-	-
D1118H	2020-09-20	53646	2020-12-10	14	-	-
P681H	2020-09-20	53638	2020-03-23	167	-	-
delH69V70	2020-09-20	53629	2020-04-20	1584	NTD	-
N501Y	2020-09-20	53625	2020-06-08	78	RBD:RBM	-
Y145del	2020-09-20	53246	2020-03-01	226	NTD	-
L18F	2020-12-04	1186	2020-02-27	25760	NTD	-
L5F	2020-11-22	658	2020-02-29	2230	SP	mask
S494P	2020-11-12	441	2020-03-20	59	RBD:RBM	-
S98F	2020-12-05	366	2020-04-08	821	NTD	-
A706V	2020-10-21	312	2020-03-25	25	-	-
V622F	2020-12-11	285	2020-03-10	339	-	-
Q677H	2020-12-12	256	2020-03-30	234	-	-
S939F	2020-11-08	253	2020-03-23	259	HR1	-
D138H	2020-12-09	229	2020-03-18	64	NTD	-
V143del	2020-11-14	189	2020-11-10	3	NTD	-
Y144F	2020-11-14	187	2020-10-22	4	NTD	-
P812S	2020-11-17	183	2020-03-27	34	-	-
V6A	2020-12-08	154	2020-11-14	1	SP	-
L216F	2020-11-08	151	2020-04-18	18	NTD	-
A831V	2020-12-13	130	2020-04-01	8	FP	-
E96D	2020-11-20	117	2020-03-23	109	NTD	-
H146Q	2020-10-21	113	2020-04-04	7	NTD	-
S221L	2020-11-08	112	2020-03-23	32	NTD	-
H245Y	2020-12-04	102	2020-03-19	107	NTD	-
Q675H	2020-12-29	86	2020-03-04	280	-	-
I818V	2020-11-17	85	2020-03-25	49	FP	-
T299I	2020-11-10	80	2020-04-17	48	NTD	-
P1263L	2020-12-14	76	2020-02-03	507	CT	-
V308L	2020-12-10	75	2020-03-30	85	-	-
R21T	2020-12-12	73	2020-03-23	10	NTD	-
I1227M	2020-12-28	71	2020-06-09	31	TM	-
L176F	2020-12-18	65	2020-03-10	988	NTD	-
K1191N	2020-11-13	54	2020-03-24	89	HR2	-
E583D	2020-11-08	51	2020-03-21	2082	-	-
V1228L	2020-12-04	51	2020-04-05	123	TM	-
T20I	2020-12-09	50	2020-04-02	35	NTD	-
A879V	2020-11-14	49	2020-03-24	21	-	-
T572I	2020-12-17	48	2020-04-20	73	-	-
T95I	2020-12-14	48	2020-03-23	194	NTD	-
A892V	2020-12-14	48	2020-04-01	20	-	-
S71F	2020-12-08	48	2020-03-30	25	NTD	-
T22I	2020-12-10	45	2020-04-01	117	NTD	-
delY145	2020-12-10	44	2021-01-28	1	NTD	-
T678I	2020-12-12	43	2020-08-31	22	-	-
S640F	2020-12-16	42	2020-04-14	63	-	-
A688V	2020-12-15	39	2020-03-03	832	-	-
T732I	2020-12-17	38	2020-03-31	12	-	-
N354D	2020-11-13	38	2020-03-24	11	RBD	-
A701V	2020-12-11	38	2020-04-03	126	-	-
R102I	2020-12-12	36	2020-03-27	133	NTD	-
S151G	2020-12-11	36	2020-12-24	1	NTD	-
A67V	2020-12-03	35	2020-04-06	150	NTD	-
K835R	2021-01-04	35	N/A	0	FP	-
C1243F	2020-12-10	34	2020-04-17	33	CT	-
H49Y	2020-12-10	34	2020-03-28	91	NTD	-
A1020V	2020-11-20	33	2020-03-30	63	-	-
A575S	2020-11-12	33	2020-03-18	14	-	-
S680F	2020-12-17	32	2020-11-04	2	-	-
L938F	2020-12-13	32	2020-03-29	66	HR1	-
W152R	2020-12-18	31	2020-06-20	65	NTD	-
A222V	2020-12-02	31	2020-03-21	50338	NTD	-
N394Y	2020-12-10	31	N/A	0	RBD	-
R765C	2020-12-11	30	2020-03-25	17	-	caution
E484K	2020-12-17	30	2020-05-18	178	RBD:RBM	-
P384L	2020-12-19	30	2020-03-31	40	RBD	-
D287G	2020-11-15	29	2020-10-07	1	NTD	-
M740V	2020-12-10	29	2021-01-10	1	-	-
S12F	2020-12-31	29	2020-03-26	105	SP	-
A1020S	2020-11-21	28	2020-04-02	296	-	-
G946V	2020-12-07	28	2020-11-12	8	HR1	-
F490S	2020-12-13	28	2020-04-05	11	RBD:RBM	-
D215Y	2020-12-13	27	2020-06-10	31	NTD	-
E180G	2020-12-13	27	2020-08-31	1	NTD	-
A626T	2020-12-11	27	N/A	0	-	-
T385N	2020-12-28	27	2020-08-27	1	RBD	-
L822F	2020-12-17	27	2020-04-03	85	FP	-
T323I	2020-12-10	27	2020-03-17	74	RBD	-
A67S	2020-12-15	27	2020-04-19	96	NTD	-
V1129I	2020-11-21	27	N/A	0	-	-
A475V	2020-11-11	26	2020-03-23	9	RBD:RBM	-
T76I	2020-12-20	25	2020-03-06	102	NTD	-
Y660F	2020-12-13	25	N/A	0	-	-
A243S	2020-12-07	25	2020-05-05	9	NTD	-
I909V	2020-12-09	25	2020-09-24	61	-	-
G1124S	2020-12-27	24	N/A	0	-	mask
S94F	2020-12-23	24	2021-01-24	1	NTD	-
S256L	2020-12-19	24	2020-04-10	729	NTD	caution
P681R	2020-12-10	23	2020-11-14	126	-	-
T76N	2020-12-31	23	2021-01-05	1	NTD	-
T961M	2020-12-16	23	N/A	0	HR1	-
A653V	2020-12-10	23	2020-03-27	32	-	caution
T307I	2020-12-16	23	2020-03-27	52	-	-
L303F	2020-11-22	22	2020-09-10	8	NTD	-
A623S	2020-11-29	22	2020-04-02	38	-	-
S254F	2020-12-21	22	2020-03-19	93	NTD	-
T547I	2020-12-21	21	2020-04-28	28	-	-
S1021F	2020-12-22	21	2020-03-23	1	-	-
P1162L	2020-12-16	21	2020-03-20	73	-	-
S884F	2020-12-13	21	2020-03-15	25	-	-
M1237I	2020-12-06	20	2020-03-19	52	CT	-
S255F	2020-12-13	20	2020-03-27	619	NTD	-
T549I	2021-01-13	20	2020-11-29	6	-	-
L752F	2020-11-27	20	N/A	0	-	-
A684V	2020-12-18	20	2020-04-26	53	-	-
A520S	2020-11-08	19	2020-04-07	85	RBD	-
T747I	2020-12-11	19	2020-03-31	23	-	-
G1219V	2020-12-09	19	2020-03-24	247	TM	-
T240I	2020-12-14	19	2020-04-13	33	NTD	-
P1162S	2020-12-21	19	2020-04-17	96	-	-
G142S	2020-12-10	19	2020-04-25	20	NTD	-
Q613H	2020-11-20	19	2020-04-22	276	-	-
H146Y	2020-12-17	18	2020-03-18	445	NTD	-
G261del	2020-12-19	18	N/A	0	NTD	-
I1221T	2021-01-03	18	N/A	0	TM	-
W258L	2020-12-27	18	2020-03-14	51	NTD	mask
E1188D	2020-12-22	18	2021-01-01	1	HR2	-
P330S	2020-12-17	18	2020-04-11	119	RBD	-
P26S	2020-12-12	18	2020-03-19	346	NTD	-
H1088Y	2021-01-22	18	N/A	0	-	-
P25L	2020-12-16	18	2020-07-02	15	NTD	-
G142V	2020-12-26	18	2020-05-13	16	NTD	-
W64R	2021-01-07	17	2020-10-05	2	NTD	-
A27V	2020-12-26	17	2020-08-26	65	NTD	-
R765H	2021-01-02	17	2020-03-24	8	-	caution
A1056V	2020-12-04	17	2020-04-29	8	-	-
K558N	2020-12-31	17	2020-05-05	75	-	-
D936Y	2021-01-01	17	2020-03-09	348	HR1	-
T1117I	2020-11-15	17	2020-03-29	134	-	-
P272L	2020-12-29	17	2020-06-03	2093	NTD	-
D1118Y	2020-12-26	17	2020-03-30	9	-	-
P82L	2020-12-15	17	N/A	0	NTD	-
A845S	2021-01-09	17	2020-03-18	112	FP	-
S940F	2020-12-10	16	2020-03-30	29	HR1	-
V367F	2020-12-10	16	2020-03-12	140	RBD	mask
V289I	2020-12-17	16	2020-03-26	22	NTD	-
D1259Y	2020-12-26	16	2020-05-22	38	CT	-
A852S	2020-11-22	16	2020-03-29	5	FP	-
L118F	2020-12-28	16	2020-03-27	8	NTD	-
R246K	2020-12-10	16	2020-04-01	5	NTD	-
P9S	2021-01-02	16	2020-03-29	18	SP	-
L455F	2020-12-07	16	2020-03-30	14	RBD:RBM	-
T883I	2020-12-22	15	2021-01-13	1	-	-
G446V	2021-01-01	15	2020-04-05	17	RBD:RBM	-
Y837H	2021-01-11	15	2020-03-30	8	FP	-
T719I	2020-12-04	15	2020-04-13	18	-	-
A522S	2020-12-02	15	2020-04-24	70	RBD	-
E1202Q	2020-12-15	15	2020-04-02	39	HR2	-
G1171S	2020-12-20	15	2020-10-12	1	HR2	-
E1111Q	2020-12-07	15	2020-03-22	13	-	-
T1006I	2020-12-31	15	2020-03-29	20	-	-
V1104L	2021-01-09	14	2020-03-29	88	-	-
T274I	2021-01-14	14	2020-05-01	2	NTD	-
S704L	2020-12-13	14	2020-03-30	16	-	-
E702D	2021-01-02	14	2020-11-01	1	-	-
M153T	2020-12-13	14	2020-08-17	31	NTD	-
Q1201K	2020-12-18	14	2020-03-29	14	HR2	-
V11F	2020-12-07	14	2020-04-21	9	SP	-
T1238I	2020-12-18	14	2020-04-07	9	CT	-
C1235F	2020-12-10	13	2020-04-01	72	TM	-
G181V	2020-12-17	13	2020-04-01	86	NTD	-
L141F	2020-11-21	13	2020-10-20	43	NTD	-
G1267R	2021-01-20	13	2020-06-25	1	CT	-
R214L	2020-12-10	13	2020-03-14	138	NTD	-
P631S	2020-12-17	13	2020-04-03	38	-	-
T618I	2020-12-16	13	2020-04-19	15	-	-
T573I	2020-12-27	13	2020-03-21	28	-	-
H655Y	2020-12-15	13	2020-03-13	893	-	-
A958S	2020-12-20	12	2020-03-30	2	HR1	-
H146R	2020-12-04	12	N/A	0	NTD	-
V16F	2020-12-13	12	2020-10-03	12	NTD	caution
A27S	2020-12-10	12	2020-03-31	44	NTD	-
P9L	2020-12-13	12	2020-04-21	14	SP	-
A344S	2020-11-18	12	2020-03-23	32	RBD	-
S13I	2020-11-24	12	2020-04-15	22	NTD	-
S1252F	2020-12-22	12	2020-03-28	24	CT	-
M153I	2020-12-13	12	2020-03-28	103	NTD	-
D178N	2020-12-17	11	2020-03-22	24	NTD	-
P807L	2021-01-13	11	2020-11-20	4	-	-
G75V	2020-12-12	11	2020-05-01	72	NTD	-
R357K	2020-12-08	11	2020-10-25	1	RBD	-
H1101Y	2020-12-30	11	2020-04-01	23	-	-
T33I	2021-01-04	11	2020-03-11	81	NTD	-
A1078S	2021-01-02	11	2020-03-13	135	-	-
Q14H	2020-12-13	11	2020-03-31	11	NTD	-
N710H	2021-01-01	11	N/A	0	-	-
E309Q	2020-12-27	11	2020-03-20	20	-	caution
Q52K	2021-01-05	10	2020-12-30	1	NTD	-
A243V	2020-12-10	10	2020-03-23	7	NTD	-
I844V	2020-12-29	10	2020-11-02	2	FP	-
P621S	2020-12-28	10	2020-08-10	5	-	-
P507A	2020-12-15	10	N/A	0	RBD:RBM	-
V622L	2020-12-15	10	2020-03-31	7	-	-
L858F	2020-12-10	10	2020-03-20	6	-	-
I1130M	2021-01-06	10	2020-10-20	23	-	-
D80Y	2020-11-21	10	2020-03-09	1168	NTD	-
S46L	2020-12-14	10	2020-04-12	1	NTD	-
P809S	2021-01-01	9	2020-04-16	23	-	-
E156D	2020-12-21	9	2020-10-14	7	NTD	-
S13T	2021-01-20	9	N/A	0	NTD	-
G1251V	2021-01-08	9	2020-04-28	37	CT	-
Y200C	2020-11-21	9	N/A	0	NTD	-
D253N	2021-01-08	9	2020-04-01	5	NTD	-
H245R	2020-12-29	9	2020-09-16	12	NTD	-
M177I	2020-12-11	9	2020-03-21	55	NTD	-
P384S	2020-12-16	9	2020-08-05	13	RBD	-
T478I	2020-12-10	9	2020-03-18	111	RBD:RBM	-
C1247F	2020-12-28	9	2020-03-18	62	CT	-
A688T	2021-01-21	9	N/A	0	-	-
W258R	2020-12-14	8	2020-07-31	3	NTD	mask
P479S	2021-01-05	8	2020-07-13	30	RBD:RBM	-
V83L	2020-12-10	8	N/A	0	NTD	-
V1264L	2020-12-29	8	2020-03-25	42	CT	-
T470I	2020-12-13	8	2020-10-26	3	RBD:RBM	-
P251L	2021-01-02	8	N/A	0	NTD	-
S155I	2021-01-01	8	2020-06-02	7	NTD	-
L922F	2020-10-21	8	2020-05-13	6	HR1	-
L552F	2020-12-07	8	2020-04-29	7	-	-
T284I	2020-12-17	8	2020-11-09	3	NTD	-
M1237L	2021-01-09	8	N/A	0	CT	-
L242I	2021-01-14	8	N/A	0	NTD	-
D1146Y	2020-11-08	8	2020-04-29	9	-	-
T323R	2021-01-04	8	2020-11-18	2	RBD	-
H1101Q	2020-12-30	8	2021-01-30	1	-	-
G496S	2020-12-14	8	N/A	0	RBD:RBM	-
G75D	2021-01-22	7	2020-11-11	6	NTD	-
K1045R	2020-11-26	7	2020-08-19	1	-	-
T1009I	2021-01-18	7	2020-04-19	6	-	-
S698L	2020-12-13	7	2020-05-04	40	-	-
D1168G	2020-12-08	7	2020-11-08	5	HR2	-
R346S	2020-12-13	7	2020-11-14	1	RBD	-
M1229I	2020-12-13	7	2020-03-25	91	TM	-
W258C	2020-12-17	7	2020-06-12	5	NTD	mask
N137S	2020-12-14	7	2020-06-25	6	NTD	-
A846V	2020-12-10	7	2020-03-19	66	FP	-
Q271K	2020-12-26	7	N/A	0	NTD	-
I1210V	2021-01-11	7	2020-10-21	1	-	-
S162I	2021-01-11	7	2020-04-26	16	NTD	-
G1219C	2021-01-04	7	2020-03-30	86	TM	-
V1176F	2021-01-10	7	2020-03-27	78	HR2	-
E654Q	2021-01-02	7	2020-08-12	91	-	-
A893V	2020-12-21	7	2020-04-01	6	-	-
T63I	2020-12-24	7	2020-04-07	1	NTD	-
N148S	2021-01-15	7	N/A	0	NTD	-
Y248H	2021-01-05	7	2020-10-22	9	NTD	-
S875A	2021-01-25	7	N/A	0	-	-
A771S	2020-12-28	7	2020-03-30	87	-	-
A262S	2020-12-10	7	2020-03-21	3672	NTD	-
H1159L	2020-12-14	7	N/A	0	-	-
T29I	2021-01-05	7	2020-04-03	267	NTD	-
D253G	2020-12-18	7	2020-05-06	90	NTD	-
A871S	2020-12-17	7	2020-04-15	41	-	-
R847T	2020-12-12	7	2020-10-03	6	FP	-
D138G	2021-01-08	7	2020-10-13	2	NTD	-
C1254F	2021-01-01	7	2020-08-20	20	CT	-
G447V	2021-01-01	6	N/A	0	RBD:RBM	-
P1079S	2020-11-22	6	2020-03-24	21	-	-
T523N	2020-12-27	6	N/A	0	RBD	-
T747N	2020-12-19	6	2020-05-08	1	-	-
M731I	2020-12-17	6	2020-03-13	32	-	-
R1014T	2021-01-01	6	2020-10-22	2	-	-
T791I	2020-12-14	6	2020-04-17	10	-	-
A522V	2021-01-23	6	2020-03-29	85	RBD	-
E154K	2021-01-15	6	2020-04-04	4	NTD	-
G339D	2021-01-09	6	2020-09-25	34	RBD	-
A672V	2020-12-20	6	2020-04-23	24	-	-
delS375T376F377	2020-12-23	6	N/A	0	RBD	-
P25S	2020-12-17	6	2020-04-03	300	NTD	-
V16A	2020-12-27	6	N/A	0	NTD	caution
E309K	2020-12-17	6	2020-12-06	1	-	caution
A879S	2020-12-29	6	2020-03-25	208	-	-
L249F	2021-01-03	6	2020-11-08	2	NTD	-
S689I	2020-12-17	6	2020-03-28	10	-	-
L179F	2021-01-02	6	2020-10-05	31	NTD	-
V90F	2020-11-14	6	2020-03-01	9	NTD	-
Q1113K	2020-12-30	6	2020-11-13	2	-	-
L754F	2020-12-09	6	2020-05-08	3	-	-
S929I	2020-12-29	6	2020-03-21	9	HR1	-
N137Y	2021-01-01	6	N/A	0	NTD	-
P1263R	2021-01-14	6	N/A	0	CT	-
T1066N	2021-01-02	6	N/A	0	-	-
N448S	2020-12-21	6	N/A	0	RBD:RBM	-
L54F	2021-01-15	6	2020-03-11	361	NTD	-
T859I	2020-12-11	6	2020-04-01	152	-	-
G1219S	2021-01-01	6	N/A	0	TM	-
Q677R	2021-01-03	6	2020-04-20	15	-	-
M1237V	2020-12-13	6	2020-06-13	4	CT	-
I1216T	2021-01-16	6	N/A	0	TM	-
V483F	2021-01-04	6	2020-04-21	33	RBD:RBM	-
S12P	2020-12-29	6	N/A	0	SP	-
G257S	2021-01-06	5	2020-03-30	6	NTD	-
D839G	2021-01-15	5	N/A	0	FP	-
A942V	2021-01-10	5	2020-03-25	3	HR1	-
L1224F	2021-01-09	5	2020-08-29	8	TM	-
V3I	2021-01-05	5	2020-04-06	3	SP	-
S1147L	2020-12-17	5	2020-03-20	8	-	-
Q957L	2021-01-11	5	2020-09-24	21	HR1	-
S373P	2020-12-15	5	2020-10-16	2	RBD	-
D1163Y	2021-01-07	5	2020-05-05	1222	HR2	-
delV143Y144	2021-01-26	5	2020-04-05	39	NTD	-
K1073N	2020-11-28	5	2020-03-13	786	-	-
T51I	2020-12-14	5	2020-03-29	56	NTD	-
A264V	2021-01-06	5	N/A	0	NTD	-
T881I	2021-01-15	5	N/A	0	-	-
S1170F	2021-01-02	5	2020-11-29	2	HR2	-
Q271L	2021-01-04	5	N/A	0	NTD	-
G446S	2020-12-30	5	2020-04-04	2	RBD:RBM	-
V127F	2020-12-21	5	2020-05-12	11	NTD	-
Q1208H	2021-01-12	5	2020-04-02	63	-	-
S359N	2020-12-05	5	2020-03-31	14	RBD	-
T385I	2020-12-14	5	2020-06-14	51	RBD	-
D138Y	2021-01-12	5	2020-04-02	76	NTD	-
D1041G	2021-01-07	5	N/A	0	-	-
N556K	2021-01-16	5	N/A	0	-	-
delI68H69	2020-11-19	5	N/A	0	NTD	-
G1124V	2020-11-17	5	2020-03-30	65	-	mask
H1058Y	2020-12-20	5	2020-10-05	5	-	-
F490L	2020-12-31	5	N/A	0	RBD:RBM	-
E748Q	2020-12-22	5	2020-10-26	2	-	-
A292T	2020-12-30	5	2020-12-09	1	NTD	-
P26L	2020-12-27	5	2020-04-01	298	NTD	-
V213L	2021-01-11	5	2020-04-30	128	NTD	-
V642F	2021-01-14	5	2020-09-24	1	-	-
A890V	2021-01-29	5	N/A	0	-	-
P337S	2020-12-18	5	2020-08-05	2	RBD	-
K356R	2021-01-02	5	2020-11-12	2	RBD	-
A845V	2020-12-17	5	2020-03-24	54	FP	-
A668S	2020-12-31	5	2020-04-02	5	-	-
Q677Y	2020-12-16	5	N/A	0	-	-
Q218E	2021-01-09	5	2021-01-02	1	NTD	-
V1230L	2020-12-10	5	2020-08-14	9	TM	-
V213A	2020-12-29	5	2020-06-02	3	NTD	-
R847K	2021-01-12	5	2020-06-10	14	FP	-
A647S	2020-12-12	5	2020-03-28	59	-	-
Q314K	2021-01-02	5	2020-11-01	4	-	-
D427N	2021-01-02	4	2020-10-21	1	RBD	-
A871V	2020-12-10	4	2020-05-07	12	-	-
R1185C	2021-01-06	4	2020-11-11	3	HR2	-
R273M	2021-01-16	4	N/A	0	NTD	-
G261C	2021-01-09	4	2020-04-16	4	NTD	-
Y144del	2020-12-18	4	2020-06-02	4	NTD	-
F157Y	2021-01-18	4	N/A	0	NTD	-
P217S	2020-12-18	4	2020-12-20	2	NTD	-
V341I	2020-12-15	4	2020-03-14	4	RBD	-
M1237T	2020-12-27	4	2020-03-18	13	CT	-
L24S	2020-12-28	4	2020-04-13	5	NTD	-
V1133I	2020-12-28	4	2020-11-11	1	-	-
L441F	2021-01-25	4	2020-12-06	1	RBD:RBM	-
R102S	2021-01-10	4	2020-04-01	43	NTD	-
A684T	2021-01-15	4	2020-08-27	8	-	-
G181R	2021-01-13	4	2020-04-01	15	NTD	-
L1203F	2021-01-03	4	2020-04-02	12	-	-
delA243L244	2020-12-14	4	2020-04-05	13	NTD	-
T76A	2020-12-18	4	2020-09-20	3	NTD	-
A348T	2021-01-13	4	2020-10-05	1	RBD	-
K1266R	2021-01-17	4	2020-03-30	9	CT	-
I1132V	2021-01-01	4	2020-11-08	7	-	-
T961A	2020-12-26	4	2020-03-30	1	HR1	-
S691F	2021-01-13	4	2020-07-04	23	-	-
F4S	2020-12-16	4	N/A	0	SP	-
I1130L	2021-01-02	4	N/A	0	-	-
S810L	2020-12-22	4	2020-05-05	31	-	-
G261V	2021-01-02	4	2020-03-05	371	NTD	-
A67T	2021-01-03	4	2020-12-04	2	NTD	-
T778I	2021-01-03	4	2020-06-01	36	-	-
T547K	2021-01-15	4	2020-04-02	7	-	-
delL242A243L244	2021-01-24	4	2020-04-25	64	NTD	-
L141del	2021-01-16	4	2020-04-14	8	NTD	-
A260V	2021-01-05	4	2020-09-24	8	NTD	-
H207Q	2021-01-02	4	2020-11-01	18	NTD	-
I468V	2021-01-03	4	2020-04-02	7	RBD:RBM	-
T1273I	2021-01-09	4	2020-04-16	5	CT	-
D867A	2020-12-11	4	N/A	0	-	-
M1233V	2020-12-25	4	N/A	0	TM	-
D1165Y	2021-01-02	4	2020-04-08	6	HR2	-
V193L	2020-11-14	4	2020-04-20	12	NTD	-
P1162Q	2021-01-19	4	N/A	0	-	-
S514F	2020-12-22	4	2020-09-21	6	RBD	-
W152L	2020-12-13	4	2020-04-07	11	NTD	-
K150E	2021-01-14	4	N/A	0	NTD	-
N679S	2021-01-02	4	N/A	0	-	-
L517F	2021-01-16	4	2020-10-05	8	RBD	-
R273T	2021-01-15	4	2020-11-12	1	NTD	-
S71T	2021-01-19	4	N/A	0	NTD	-
G339S	2021-01-15	4	2020-11-18	3	RBD	-
R190M	2021-01-04	4	2020-09-21	228	NTD	-
K1073M	2020-12-16	4	N/A	0	-	-
S459F	2021-01-09	4	2020-10-21	1	RBD:RBM	-
T19I	2021-01-03	4	2020-04-22	46	NTD	-
G261R	2020-12-02	4	2020-08-21	4	NTD	-
A623V	2020-11-28	4	2020-03-18	48	-	-
K1245N	2021-01-22	4	2020-05-31	4	CT	-
T1160K	2021-01-25	4	N/A	0	-	-
G832S	2021-01-09	4	2020-04-02	4	FP	-
V952I	2021-01-21	4	N/A	0	HR1	-
S373L	2021-01-26	4	2020-09-11	3	RBD	-
S247I	2021-01-19	4	2020-11-14	2	NTD	-
A348S	2020-12-16	4	2020-04-15	24	RBD	-
G842D	2020-12-31	4	2020-09-01	8	FP	-
Q787R	2021-01-15	4	2021-01-11	1	-	-
A1070V	2020-11-12	3	2020-06-14	23	-	-
E96K	2021-02-03	3	N/A	0	NTD	-
S477R	2021-01-20	3	2020-04-06	15	RBD:RBM	-
E484G	2021-01-10	3	N/A	0	RBD:RBM	-
T208M	2021-01-02	3	2020-09-07	10	NTD	-
S31F	2020-11-21	3	2020-03-26	3	NTD	-
E1207D	2021-01-01	3	2020-03-21	30	-	-
A783S	2021-01-14	3	2020-04-21	10	-	-
A262V	2020-12-12	3	2020-11-23	1	NTD	-
H625Y	2021-01-26	3	2020-09-13	4	-	-
S750N	2021-01-02	3	N/A	0	-	-
S943I	2020-12-16	3	2020-04-23	6	HR1	-
G252V	2021-01-29	3	2020-10-20	12	NTD	-
K1205N	2020-12-15	3	2020-04-10	19	-	-
T572S	2021-01-12	3	2020-10-10	3	-	-
I472T	2020-12-30	3	2020-11-18	1	RBD:RBM	-
T259I	2021-01-18	3	2020-10-29	2	NTD	-
D950H	2021-01-04	3	2020-09-26	5	HR1	-
C1236F	2021-01-07	3	2020-03-31	8	TM	-
R1091C	2021-01-12	3	2020-06-02	8	-	-
S591F	2020-12-10	3	2020-10-22	3	-	-
R646H	2021-01-17	3	2020-11-04	2	-	-
P1143L	2021-01-12	3	2020-04-06	7	-	-
K147R	2021-01-29	3	N/A	0	NTD	-
V687L	2021-01-05	3	2020-06-09	282	-	-
G639V	2020-12-13	3	2020-04-17	2	-	-
K77N	2021-01-01	3	2020-04-14	4	NTD	-
A1078V	2020-12-17	3	2020-04-06	39	-	-
P330L	2021-01-09	3	2020-09-10	1	RBD	-
M1050I	2021-01-22	3	2020-09-09	23	-	-
K1073T	2020-12-17	3	2020-03-29	1	-	-
D88Y	2021-01-25	3	2020-04-16	1	NTD	-
V267L	2020-12-04	3	2020-10-14	3	NTD	-
A570Y	2020-12-09	3	N/A	0	-	-
A829T	2021-01-18	3	2020-05-04	2	FP	-
G142A	2021-01-23	3	2020-12-20	1	NTD	-
K528R	2020-12-24	3	N/A	0	RBD	-
P174S	2020-12-11	3	2020-07-16	4	NTD	-
D843G	2021-01-07	3	2020-12-07	1	FP	-
I358V	2021-01-04	3	N/A	0	RBD	-
I1114T	2021-01-06	3	2020-11-22	1	-	-
G476S	2020-12-28	3	2020-03-23	7	RBD:RBM	-
S221A	2021-01-17	3	N/A	0	NTD	-
S477G	2021-01-08	3	N/A	0	RBD:RBM	-
K417N	2021-01-03	3	2020-04-16	64	RBD	-
A701S	2021-01-22	3	2020-03-27	9	-	-
D1139H	2020-12-30	3	2020-06-20	6	-	-
M1229V	2021-01-17	3	2020-04-30	1	TM	-
P499H	2021-01-22	3	2020-11-14	2	RBD:RBM	-
T941A	2021-01-16	3	2020-03-31	4	HR1	-
E154G	2021-01-15	3	2020-04-24	1	NTD	-
P251H	2021-01-19	3	N/A	0	NTD	-
G257D	2021-01-08	3	2020-04-11	51	NTD	-
D808N	2021-01-22	3	2020-05-15	1	-	-
Q321K	2021-01-23	3	N/A	0	RBD	-
P479L	2020-12-13	3	2020-05-18	2	RBD:RBM	-
I105V	2021-01-18	3	2020-12-26	1	NTD	-
E661D	2021-01-06	3	2020-07-20	16	-	-
P809L	2020-12-26	3	2020-10-07	30	-	-
V1177L	2021-01-12	3	2020-04-28	3	HR2	-
N282K	2021-01-25	3	N/A	0	NTD	-
P812L	2021-01-11	3	2020-04-03	60	-	-
E1195G	2021-01-14	3	2020-10-11	11	HR2	-
R408K	2020-12-20	3	N/A	0	RBD	-
L390F	2020-11-22	3	N/A	0	RBD	-
D568N	2020-12-29	3	2020-10-16	1	-	-
S71Y	2021-01-12	3	2020-04-19	1	NTD	-
A222S	2020-12-20	3	2020-04-20	4	NTD	-
A352V	2020-12-27	3	2020-05-24	5	RBD	-
I805V	2021-01-28	3	2020-12-29	1	-	-
S1170T	2021-01-28	3	2020-05-17	1	HR2	-
V1164F	2020-12-15	3	N/A	0	HR2	-
Y508H	2020-12-28	3	2020-09-07	15	RBD:RBM	-
R246G	2021-01-03	3	N/A	0	NTD	-
P39T	2021-01-13	3	N/A	0	NTD	-
L858V	2021-01-19	3	N/A	0	-	-
T108I	2021-01-15	3	N/A	0	NTD	-
A653S	2021-01-01	3	2020-10-15	1	-	caution
K1205T	2021-01-22	3	N/A	0	-	-
T376I	2021-01-26	3	2020-09-02	16	RBD	-
E780G	2021-01-10	3	N/A	0	-	-
F79L	2021-01-02	3	2020-07-19	6	NTD	-
Y1155F	2020-12-24	3	2020-12-10	14	-	-
I197V	2021-01-21	3	N/A	0	NTD	-
G1085R	2020-12-29	3	2020-06-09	13	-	-
L8F	2021-01-06	3	2020-06-26	9	SP	-
D796N	2021-01-27	3	2020-11-23	1	-	-
G496R	2021-01-23	3	N/A	0	RBD:RBM	-
F157L	2021-01-11	3	2020-08-18	138	NTD	-
V597I	2020-12-28	3	N/A	0	-	-
D796Y	2021-01-14	3	2020-04-12	30	-	-
D198G	2020-12-28	3	2020-07-03	180	NTD	-
I1216V	2020-12-30	3	2020-10-30	21	TM	-
G594S	2021-01-01	3	N/A	0	-	-
P25T	2020-12-16	3	2020-05-14	4	NTD	-
Q271R	2021-01-14	3	N/A	0	NTD	-
T553I	2021-01-12	3	2020-04-09	21	-	-
N148T	2021-01-14	3	2020-10-09	2	NTD	-
V1189I	2021-01-09	2	2020-08-27	1	HR2	-
S151N	2021-01-03	2	2020-04-27	2	NTD	-
G232C	2021-01-16	2	2020-04-13	7	NTD	-
Q628K	2020-12-20	2	2020-11-05	1	-	-
M177T	2020-12-29	2	2020-09-14	3	NTD	-
R683W	2020-11-10	2	2020-09-24	5	-	-
A520V	2021-01-15	2	2020-04-11	2	RBD	-
G891S	2021-01-09	2	N/A	0	-	-
I100T	2020-12-22	2	2020-11-05	3	NTD	-
I1221V	2021-01-19	2	N/A	0	TM	-
Q1180L	2021-01-08	2	N/A	0	HR2	-
D1139Y	2021-01-22	2	N/A	0	-	-
F140L	2021-01-03	2	2021-01-15	1	NTD	-
E281Q	2021-01-29	2	2020-04-16	41	NTD	-
G476A	2020-12-29	2	2020-05-07	2	RBD:RBM	-
L244S	2021-01-02	2	2020-11-05	1	NTD	-
H66N	2021-01-02	2	N/A	0	NTD	-
V615A	2020-11-27	2	N/A	0	-	-
Q872L	2021-01-10	2	2020-11-01	3	-	-
N710K	2020-12-16	2	N/A	0	-	-
F186L	2020-12-31	2	2020-11-13	3	NTD	-
P322S	2021-01-15	2	2020-09-10	9	RBD	-
T250I	2020-12-10	2	2020-11-23	1	NTD	-
V987I	2021-01-05	2	N/A	0	-	-
D745E	2021-02-03	2	2020-06-16	1	-	-
D1153Y	2020-12-27	2	2020-03-04	7	-	-
I1081V	2021-01-08	2	2020-08-20	5	-	-
Q1180K	2021-01-02	2	N/A	0	HR2	-
L699I	2020-12-22	2	2020-09-21	7	-	-
E340K	2021-01-14	2	N/A	0	RBD	-
D420A	2021-01-07	2	N/A	0	RBD	-
S477N	2021-01-12	2	2020-04-01	2661	RBD:RBM	-
delA67I68	2020-12-20	2	N/A	0	NTD	-
I1081L	2021-01-02	2	N/A	0	-	-
R567I	2021-01-05	2	N/A	0	-	-
I210del	2020-12-30	2	2020-07-05	397	NTD	-
V227I	2021-01-19	2	2020-03-21	3	NTD	-
N440T	2021-01-25	2	2020-09-10	1	RBD:RBM	-
G232V	2021-01-27	2	2020-10-05	5	NTD	-
D198A	2021-01-08	2	N/A	0	NTD	-
R1091H	2021-01-01	2	2020-03-21	4	-	-
H1271Y	2020-11-22	2	2020-10-26	1	CT	-
G946E	2021-01-22	2	2020-11-01	6	HR1	-
N751Y	2021-01-25	2	N/A	0	-	-
E1202A	2020-12-31	2	N/A	0	HR2	-
T51A	2021-01-03	2	2021-01-11	1	NTD	-
delL141G142V143Y144Y145	2021-01-22	2	N/A	0	NTD	-
A1226S	2020-12-17	2	N/A	0	TM	-
G485V	2020-12-30	2	N/A	0	RBD:RBM	-
N487T	2021-01-11	2	N/A	0	RBD:RBM	-
R346K	2021-01-12	2	2020-09-18	3	RBD	-
A942T	2021-01-22	2	N/A	0	HR1	-
V1137F	2021-01-16	2	2020-11-21	1	-	-
P631L	2020-12-10	2	2020-03-23	2	-	-
A1087S	2021-01-27	2	2020-03-11	70	-	-
K150R	2021-02-03	2	2020-10-05	1	NTD	-
P681Y	2021-01-29	2	N/A	0	-	-
P862S	2021-01-12	2	2020-09-11	12	-	-
K1086R	2021-01-15	2	2020-05-06	3	-	-
D1084G	2021-01-14	2	2020-09-25	34	-	-
G1246S	2021-01-25	2	2020-11-05	15	CT	-
D1260N	2021-01-24	2	2020-10-06	3	CT	-
V687I	2021-01-26	2	2020-04-30	4	-	-
V635I	2021-01-29	2	N/A	0	-	-
Q239H	2021-01-01	2	2020-10-25	2	NTD	-
R273S	2021-01-08	2	2020-08-12	4	NTD	-
D1199N	2020-12-11	2	2020-10-01	10	HR2	-
V1268L	2021-01-11	2	N/A	0	CT	-
A411S	2021-01-19	2	2020-04-15	26	RBD	-
A435T	2021-01-13	2	N/A	0	RBD	-
G932C	2021-01-14	2	2020-04-07	2	HR1	-
L922M	2020-12-31	2	N/A	0	HR1	-
R78M	2020-12-26	2	2020-10-05	17	NTD	-
E484D	2021-01-18	2	N/A	0	RBD:RBM	-
D627H	2021-01-29	2	N/A	0	-	-
R646L	2021-01-26	2	N/A	0	-	-
G744S	2020-12-26	2	2020-06-07	2	-	-
S155R	2021-01-13	2	N/A	0	NTD	-
P26H	2020-12-18	2	N/A	0	NTD	-
S247R	2021-01-28	2	N/A	0	NTD	-
Y28C	2021-01-01	2	N/A	0	NTD	-
I794L	2021-01-09	2	2020-10-05	139	-	-
G447S	2021-01-24	2	N/A	0	RBD:RBM	-
R190K	2020-12-24	2	2020-03-29	19	NTD	-
P82S	2021-01-12	2	2020-09-24	1	NTD	-
K150I	2021-01-05	2	N/A	0	NTD	-
T286I	2020-12-14	2	2020-04-08	7	NTD	-
E990Q	2021-01-01	2	N/A	0	-	-
ins16ATLR	2021-01-17	2	N/A	0	NTD	-
K458N	2021-01-02	2	2020-10-12	1	RBD:RBM	-
D1146H	2020-12-17	2	2020-09-24	11	-	-
N710D	2020-12-29	2	N/A	0	-	-
V227L	2021-01-09	2	2020-11-14	1	NTD	-
V642L	2021-01-05	2	N/A	0	-	-
Q836L	2020-12-10	2	2020-11-01	1	FP	-
N540K	2021-01-21	2	N/A	0	RBD	-
G1131E	2021-01-03	2	2020-10-31	1	-	-
D574Y	2020-12-17	2	2020-03-30	324	-	-
V1133F	2021-01-10	2	2020-03-20	22	-	-
G181A	2021-01-09	2	2020-03-23	18	NTD	-
H146N	2021-01-18	2	N/A	0	NTD	-
delD138P139F140L141G142V143Y144Y145	2021-01-02	2	2020-05-11	2	NTD	-
V3G	2021-01-30	2	2020-04-17	65	SP	-
R190S	2021-01-02	2	N/A	0	NTD	-
N185D	2021-01-10	2	2020-03-13	7	NTD	-
G1167V	2020-12-29	2	2020-06-16	1181	HR2	-
N1192T	2020-12-17	2	2020-10-05	2	HR2	-
C1250F	2020-12-29	2	2020-03-27	201	CT	-
G1251R	2020-12-31	2	2020-10-14	2	CT	-
Y145H	2020-12-29	2	2020-07-30	4	NTD	-
N87K	2021-01-23	2	2020-09-27	3	NTD	-
V576A	2020-12-13	2	N/A	0	-	-
R21I	2021-01-07	2	2020-03-12	1104	NTD	-
Y505H	2020-12-24	2	2020-11-02	2	RBD:RBM	-
V395L	2021-01-09	2	2020-09-28	1	RBD	-
F643del	2021-01-20	2	N/A	0	-	-
Q52R	2021-01-07	2	2020-10-14	70	NTD	-
L849F	2021-01-17	2	2020-03-29	9	FP	-
E324K	2021-01-02	2	2020-11-18	4	RBD	-
L452R	2021-01-14	2	2020-10-19	115	RBD:RBM	-
E484Q	2021-01-01	2	2020-09-29	16	RBD:RBM	-
H1083Y	2021-01-17	2	2020-11-18	10	-	-
S596N	2020-12-30	2	N/A	0	-	-
A288S	2021-01-12	2	2020-11-02	1	NTD	-
A1016S	2021-01-25	2	N/A	0	-	-
A1070S	2021-01-23	2	2020-08-07	29	-	-
P521S	2021-01-10	2	2020-04-08	5	RBD	-
Q493R	2021-01-03	2	2020-04-22	1	RBD:RBM	-
V860L	2021-01-12	2	2020-11-09	1	-	-
S1252P	2021-01-03	2	2020-04-12	74	CT	-
Y279F	2021-01-15	2	2020-11-14	1	NTD	-
D1163N	2020-12-16	2	N/A	0	HR2	-
G219S	2021-01-26	2	2020-11-13	3	NTD	-
K986N	2021-01-13	2	2020-03-19	1	-	-
S735L	2021-01-19	2	2020-04-04	2	-	caution
T124I	2021-01-08	2	2020-05-11	2	NTD	-
Q836K	2020-12-15	2	2020-11-23	6	FP	-
T961S	2021-01-19	2	N/A	0	HR1	-
V705F	2020-12-30	2	2020-11-04	4	-	-
N185Y	2021-01-28	2	N/A	0	NTD	-
K854N	2020-12-19	2	2020-06-25	8	FP	-
V362F	2020-11-18	2	2020-08-17	3	RBD	-
E224Q	2020-12-15	2	2020-11-07	10	NTD	-
A924T	2021-01-14	2	N/A	0	HR1	-
N354S	2021-01-08	2	N/A	0	RBD	-
A344T	2021-01-02	2	N/A	0	RBD	-
I712V	2020-12-08	2	2020-09-04	1	-	-
S1239N	2021-01-04	2	N/A	0	CT	-
T630I	2021-01-12	2	2020-09-16	1	-	-
T430I	2020-09-30	2	2020-07-02	1	RBD	-
L1024I	2021-01-12	2	N/A	0	-	-
L552I	2020-12-23	2	N/A	0	-	-
P1069S	2021-01-15	2	2020-09-14	193	-	-
I101M	2021-01-21	2	2020-12-10	4	NTD	-
P728L	2021-01-17	2	2020-11-02	1	-	caution
N1119S	2021-01-08	2	N/A	0	-	-
V705L	2021-01-15	2	2020-10-08	9	-	-
N87Y	2020-12-29	2	N/A	0	NTD	-
N74T	2021-01-02	2	N/A	0	NTD	-
E1207A	2020-11-14	2	N/A	0	-	-
L276V	2021-01-20	2	N/A	0	NTD	caution
V70I	2020-12-20	2	2020-10-10	6	NTD	-
F32Y	2020-12-17	2	N/A	0	NTD	caution
T604N	2021-01-23	2	N/A	0	-	-
A1087V	2021-01-10	2	2020-11-08	1	-	-
delS60N61	2020-12-25	2	N/A	0	NTD	-
F59L	2021-01-18	2	N/A	0	NTD	-
R1107S	2021-01-13	2	2020-05-06	17	-	-
D1084E	2021-01-17	2	2020-11-14	1	-	-
C1235S	2021-01-24	2	N/A	0	TM	-
G769V	2020-12-17	2	2020-03-13	237	-	-
R577C	2021-01-12	2	2020-12-10	2	-	caution
Q218H	2021-01-11	2	2020-09-19	61	NTD	-
C1247Y	2021-01-04	2	2020-05-21	7	CT	-
V608F	2021-01-13	2	N/A	0	-	-
D1084Y	2020-12-31	2	2020-04-22	132	-	-
R237K	2020-12-17	2	2020-08-21	13	NTD	-
G639D	2020-12-27	2	N/A	0	-	-
E96A	2021-01-10	2	2020-11-03	1	NTD	-
S255Y	2021-01-16	2	N/A	0	NTD	-
E1092K	2020-12-26	2	N/A	0	-	-
D1260Y	2021-01-31	2	2020-06-19	11	CT	-
G72V	2021-01-30	2	2020-10-09	10	NTD	-
P507S	2021-01-05	2	N/A	0	RBD:RBM	-
D111N	2020-12-18	2	2020-04-17	19	NTD	-
V503F	2021-01-26	2	2020-11-01	4	RBD:RBM	-
T678N	2021-01-28	2	2020-10-26	1	-	-
T1116S	2021-01-19	2	N/A	0	-	-
L1265F	2021-01-29	2	2020-04-28	2	CT	-
Q23L	2021-01-08	2	N/A	0	NTD	-
P85L	2021-01-25	2	N/A	0	NTD	-
K1181R	2021-01-19	2	2020-09-01	1	HR2	-
V860I	2021-01-03	2	2020-12-10	16	-	-
L1200F	2020-12-30	2	2020-06-10	15	HR2	-
P521L	2020-12-10	2	2020-04-29	1	RBD	-
F456Y	2020-12-26	2	N/A	0	RBD:RBM	-
N1194Y	2021-01-28	1	2020-03-04	5	HR2	-
V1068I	2021-01-09	1	2020-06-01	21	-	-
K417E	2021-01-10	1	N/A	0	RBD	-
L1004F	2020-12-16	1	N/A	0	-	-
S375F	2021-01-25	1	N/A	0	RBD	-
G1167R	2021-01-26	1	N/A	0	HR2	-
delT638G639S640	2021-01-29	1	N/A	0	-	-
L1203I	2021-01-12	1	N/A	0	-	-
I805M	2021-01-12	1	2020-08-24	1	-	-
Q607K	2021-01-12	1	N/A	0	-	-
N394I	2020-11-28	1	N/A	0	RBD	-
T859A	2021-01-08	1	N/A	0	-	-
S359G	2021-01-10	1	N/A	0	RBD	-
H519P	2021-01-01	1	N/A	0	RBD	-
S591A	2021-01-18	1	N/A	0	-	-
P793S	2021-01-30	1	2020-08-25	2	-	-
V551I	2021-01-02	1	N/A	0	-	-
C136Y	2021-01-11	1	N/A	0	NTD	-
G72E	2021-01-16	1	2020-03-04	13	NTD	-
A852T	2021-01-19	1	N/A	0	FP	-
K147E	2021-01-04	1	2020-08-02	2	NTD	-
I1225T	2021-01-24	1	2020-11-08	2	TM	-
D1199Y	2021-01-19	1	2020-08-31	9	HR2	-
H66L	2020-12-18	1	N/A	0	NTD	-
delL141	2021-01-08	1	N/A	0	NTD	-
A879T	2021-01-20	1	2020-03-22	8	-	-
R214C	2021-01-28	1	2020-04-27	1	NTD	-
T724S	2021-01-08	1	N/A	0	-	-
I670V	2021-01-23	1	2020-05-28	2	-	-
K537N	2021-01-06	1	2020-11-02	1	RBD	-
A292S	2020-11-02	1	2020-05-03	10	NTD	-
V395A	2021-01-25	1	N/A	0	RBD	-
A475T	2021-01-22	1	N/A	0	RBD:RBM	-
G504S	2021-01-23	1	N/A	0	RBD:RBM	-
K150Q	2021-01-15	1	N/A	0	NTD	-
I410V	2021-01-25	1	2020-04-27	3	RBD	-
P337L	2021-01-27	1	2020-12-18	2	RBD	-
S673G	2020-12-28	1	2020-06-10	1	-	-
D215N	2021-01-04	1	N/A	0	NTD	-
S721R	2021-01-27	1	N/A	0	-	-
L582F	2021-01-24	1	N/A	0	-	-
T739A	2021-02-01	1	N/A	0	-	-
F833L	2020-12-29	1	N/A	0	FP	-
L629F	2020-11-21	1	2020-10-07	2	-	-
L828F	2020-12-29	1	N/A	0	FP	-
L849I	2021-01-08	1	N/A	0	FP	-
T827A	2021-01-17	1	2020-04-29	1	FP	-
R158I	2021-01-22	1	2020-08-03	1	NTD	-
P174L	2021-01-18	1	2020-10-06	1	NTD	-
E169K	2021-01-30	1	N/A	0	NTD	-
K964R	2021-01-28	1	N/A	0	HR1	-
R158G	2020-12-26	1	2020-07-14	4	NTD	-
A243del	2021-01-09	1	2020-05-05	3	NTD	-
V608I	2020-12-29	1	2020-11-12	2	-	-
V433I	2021-01-01	1	2020-04-08	1	RBD	-
T415I	2020-12-10	1	N/A	0	RBD	-
I210T	2020-12-07	1	2020-09-09	7	NTD	-
K182R	2021-01-09	1	2020-06-10	17	NTD	-
Y1155H	2020-11-13	1	2020-09-21	1	-	-
I402V	2021-01-14	1	2020-06-11	17	RBD	-
V1268F	2020-12-30	1	2020-10-13	1	CT	-
S151I	2021-01-08	1	2020-04-11	34	NTD	-
T723A	2020-12-05	1	N/A	0	-	-
G1124C	2020-12-29	1	2020-06-23	4	-	mask
I1172V	2021-01-26	1	2021-01-04	1	HR2	-
E96Q	2021-01-24	1	N/A	0	NTD	-
G446A	2021-01-19	1	2020-05-07	1	RBD:RBM	-
A771V	2021-01-19	1	N/A	0	-	-
I1114V	2021-01-10	1	2020-04-03	2	-	-
Q134R	2020-12-23	1	N/A	0	NTD	-
T345S	2021-01-26	1	N/A	0	RBD	-
V772I	2021-01-15	1	2020-03-30	281	-	-
T63N	2021-01-09	1	2020-08-12	2	NTD	-
I1225F	2021-01-29	1	2020-08-06	6	TM	-
V615L	2020-11-08	1	2020-07-18	1	-	-
T1120I	2021-01-16	1	2020-03-22	6	-	-
P1263T	2021-01-03	1	2020-09-24	63	CT	-
M1050T	2020-12-13	1	N/A	0	-	-
ins253S	2021-01-07	1	N/A	0	NTD	-
V1189A	2021-01-25	1	N/A	0	HR2	-
E465D	2020-12-09	1	2020-10-05	1	RBD:RBM	-
K304E	2021-01-25	1	N/A	0	-	-
S530P	2021-01-19	1	N/A	0	RBD	-
F782Y	2020-12-10	1	N/A	0	-	-
G142D	2021-01-08	1	2020-03-26	12	NTD	-
R102G	2021-01-09	1	2020-04-04	12	NTD	-
D228H	2021-01-05	1	2020-11-05	2	NTD	-
E1182Q	2021-01-25	1	2020-06-17	19	HR2	-
L10V	2020-12-22	1	2020-08-04	1	SP	-
A411V	2020-11-21	1	N/A	0	RBD	-
P426S	2020-12-21	1	2020-11-22	5	RBD	-
S255P	2021-01-15	1	2020-04-04	6	NTD	-
S371F	2020-12-15	1	N/A	0	RBD	-
L1200I	2021-01-31	1	2020-06-07	1	HR2	-
D820G	2021-01-04	1	N/A	0	FP	-
R408I	2021-01-12	1	2020-04-20	19	RBD	-
S325Y	2020-12-16	1	N/A	0	RBD	-
C1240Y	2021-01-18	1	N/A	0	CT	-
P863S	2020-12-21	1	2021-01-02	1	-	-
F55Y	2021-01-03	1	N/A	0	NTD	-
L242F	2021-01-25	1	2020-05-08	8	NTD	-
Q564H	2021-01-19	1	N/A	0	-	-
delY144	2021-01-03	1	N/A	0	NTD	-
V911I	2021-01-12	1	2020-08-18	4	-	-
S967G	2021-01-19	1	N/A	0	HR1	-
E773G	2020-12-26	1	N/A	0	-	-
G504D	2021-01-15	1	N/A	0	RBD:RBM	-
G548D	2021-01-02	1	N/A	0	-	-
L1224S	2020-12-07	1	2020-11-20	3	TM	-
P621L	2020-12-27	1	N/A	0	-	-
S943R	2021-01-22	1	N/A	0	HR1	-
A163V	2020-12-13	1	2020-05-02	6	NTD	-
M740I	2021-01-12	1	2020-10-05	12	-	-
V615I	2021-01-27	1	2020-03-21	12	-	-
Q1142L	2020-12-21	1	N/A	0	-	-
C15F	2021-01-22	1	2020-04-16	20	NTD	-
V120I	2020-12-24	1	2020-04-07	1	NTD	-
L244V	2021-01-02	1	N/A	0	NTD	-
K187N	2020-12-29	1	N/A	0	NTD	-
P217H	2021-01-20	1	N/A	0	NTD	-
G447D	2021-01-12	1	N/A	0	RBD:RBM	-
E780Q	2021-01-10	1	2020-04-21	4	-	-
D820E	2021-01-05	1	N/A	0	FP	-
E309A	2021-02-03	1	N/A	0	-	caution
G184S	2021-01-20	1	2020-04-02	13	NTD	-
Q173R	2021-01-04	1	2020-06-04	1	NTD	-
R21G	2021-01-18	1	2020-11-04	15	NTD	-
T33K	2021-01-04	1	2020-12-05	61	NTD	-
K462I	2021-01-21	1	N/A	0	RBD:RBM	-
T315I	2020-12-27	1	N/A	0	-	caution
E1144Q	2021-01-29	1	2020-12-16	2	-	-
A263V	2021-01-11	1	2020-07-14	16	NTD	-
N824Y	2021-01-24	1	2020-09-27	1	FP	-
E554Q	2020-12-19	1	2020-08-21	2	-	-
S758I	2021-01-30	1	N/A	0	-	-
R21K	2020-12-10	1	2020-03-26	84	NTD	-
Y248C	2021-01-11	1	N/A	0	NTD	-
W64L	2021-01-02	1	2020-04-22	21	NTD	-
Q1113H	2021-01-05	1	N/A	0	-	-
K378R	2021-01-05	1	N/A	0	RBD	-
C15S	2021-01-09	1	N/A	0	NTD	-
D820Y	2020-12-26	1	2020-10-15	1	FP	-
I1227V	2021-01-22	1	N/A	0	TM	-
I624V	2020-12-30	1	2021-01-03	1	-	-
M1229del	2021-01-22	1	N/A	0	TM	-
F515L	2021-01-02	1	N/A	0	RBD	-
I1114M	2020-12-29	1	N/A	0	-	-
N703H	2021-01-20	1	N/A	0	-	-
P209L	2020-12-15	1	2020-04-26	1	NTD	-
S71P	2021-01-26	1	2020-08-31	77	NTD	-
V1164I	2021-01-12	1	2020-04-21	17	HR2	-
N657K	2021-01-23	1	N/A	0	-	-
D843N	2021-01-30	1	N/A	0	FP	-
G857C	2020-11-26	1	N/A	0	-	-
Q580R	2021-01-22	1	2020-11-01	1	-	caution
T676S	2021-01-08	1	2020-04-15	1	-	-
N960K	2021-01-31	1	2020-10-30	1	HR1	-
K795R	2021-01-20	1	2020-12-16	1	-	-
V1033I	2021-01-06	1	N/A	0	-	-
delY145H146	2021-01-29	1	2020-07-16	1	NTD	-
G1093C	2021-01-19	1	N/A	0	-	-
F490V	2020-12-27	1	N/A	0	RBD:RBM	-
S929N	2020-12-18	1	N/A	0	HR1	-
L8S	2020-12-28	1	N/A	0	SP	-
D830V	2021-01-03	1	N/A	0	FP	-
A93V	2021-01-12	1	2020-04-05	1	NTD	-
T109S	2021-01-30	1	2020-11-14	1	NTD	-
K300R	2021-01-28	1	2020-10-29	1	NTD	-
Q564E	2021-01-27	1	N/A	0	-	-
Y145N	2021-01-17	1	2020-06-02	3	NTD	-
G669A	2021-01-02	1	2020-06-10	2	-	-
S1196Y	2021-01-22	1	N/A	0	HR2	-
S1242I	2021-01-10	1	2020-05-08	22	CT	-
V483I	2020-12-28	1	2020-03-28	4	RBD:RBM	-
G446D	2020-12-22	1	N/A	0	RBD:RBM	-
G257V	2021-01-11	1	2020-09-06	13	NTD	-
Q613L	2021-01-03	1	N/A	0	-	-
M1233I	2020-12-18	1	2020-08-27	1	TM	-
T323A	2021-01-12	1	2020-11-21	3	RBD	-
delL1265K1266G1267V1268K1269L1270H1271Y1272T1273	2021-01-03	1	N/A	0	CT	-
K147N	2020-12-29	1	2020-11-22	1	NTD	-
S50L	2021-01-18	1	2020-03-16	18	NTD	-
L945I	2021-01-11	1	2020-04-14	1	HR1	-
T791P	2021-01-25	1	2020-11-02	1	-	-
F456L	2021-01-12	1	N/A	0	RBD:RBM	-
F32L	2020-12-17	1	2020-03-28	6	NTD	caution
P1263Q	2021-01-14	1	2020-08-16	2	CT	-
A67G	2021-01-24	1	N/A	0	NTD	-
D1259V	2021-01-19	1	N/A	0	CT	-
E654K	2021-01-30	1	2021-01-20	1	-	-
T250N	2021-01-26	1	2020-05-11	14	NTD	-
D745G	2020-12-15	1	2020-04-20	18	-	-
N544Y	2020-12-31	1	N/A	0	-	-
K113N	2021-02-01	1	N/A	0	NTD	-
K1181N	2021-01-08	1	2021-01-10	1	HR2	-
Q628R	2021-01-25	1	N/A	0	-	-
N1108S	2021-01-08	1	2020-09-03	1	-	-
I834T	2020-12-07	1	2020-04-09	22	FP	-
D88H	2021-01-29	1	N/A	0	NTD	-
K1266*	2021-01-11	1	N/A	0	CT	-
I472V	2021-01-02	1	2020-09-14	7	RBD:RBM	-
S975N	2021-01-22	1	N/A	0	-	-
G769R	2021-01-25	1	2020-04-02	6	-	-
N703S	2021-01-22	1	2020-03-24	2	-	-
L513F	2020-12-26	1	2020-06-23	2	RBD	-
delI624H625A626	2021-01-20	1	N/A	0	-	-
P1090S	2021-01-30	1	N/A	0	-	-
P1162T	2020-12-17	1	2020-05-08	1	-	-
V1122L	2021-01-21	1	2020-03-30	108	-	-
T761I	2021-02-03	1	2020-03-26	3	-	-
T523A	2021-01-03	1	N/A	0	RBD	-
N149Y	2021-01-25	1	2020-11-03	1	NTD	-
P1263A	2021-01-20	1	N/A	0	CT	-
V130F	2021-01-30	1	2020-10-06	2	NTD	-
P384T	2021-01-15	1	N/A	0	RBD	-
E309G	2021-01-19	1	N/A	0	-	caution
K814T	2021-01-23	1	N/A	0	-	-
K444R	2021-01-30	1	2020-07-30	30	RBD:RBM	-
G1099D	2021-01-09	1	2020-11-22	4	-	-
P809T	2021-01-09	1	2020-10-02	7	-	-
N1178S	2021-01-02	1	N/A	0	HR2	-
N87S	2020-12-30	1	N/A	0	NTD	-
D428H	2021-01-17	1	N/A	0	RBD	-
K417R	2021-01-10	1	N/A	0	RBD	-
A163E	2020-12-26	1	2020-11-01	1	NTD	-
V1065F	2021-01-06	1	N/A	0	-	-
P521T	2021-01-25	1	N/A	0	RBD	-
L945F	2021-01-01	1	N/A	0	HR1	-
T716V	2020-12-06	1	N/A	0	-	-
T1027I	2021-01-26	1	2020-04-17	41	-	-
V6I	2021-01-30	1	2020-04-03	2	SP	-
K1191T	2021-01-12	1	N/A	0	HR2	-
E1182D	2020-12-08	1	N/A	0	HR2	-
A522T	2021-01-08	1	N/A	0	RBD	-
V785I	2021-01-17	1	2020-11-02	4	-	-
V642G	2020-12-17	1	2020-10-07	1	-	-
A260D	2021-01-11	1	2020-10-10	1	NTD	-
F374S	2020-12-26	1	N/A	0	RBD	-
Y449H	2020-12-11	1	N/A	0	RBD:RBM	-
R346I	2021-01-02	1	2020-10-15	2	RBD	-
S704P	2021-01-16	1	N/A	0	-	-
G199V	2020-12-14	1	2021-01-13	1	NTD	-
T523I	2021-01-19	1	2020-11-01	1	RBD	-
T768I	2021-01-17	1	N/A	0	-	-
Q957R	2021-01-31	1	2020-10-12	1	HR1	-
N717S	2021-01-03	1	2020-10-30	7	-	-
A672S	2020-12-15	1	N/A	0	-	-
V289L	2021-01-27	1	2020-09-24	11	NTD	-
R466S	2021-01-29	1	N/A	0	RBD:RBM	-
T208K	2021-01-11	1	N/A	0	NTD	-
L452M	2021-01-26	1	2020-10-16	6	RBD:RBM	-
G932V	2020-12-27	1	2020-12-11	3	HR1	-
R246I	2021-01-25	1	2020-10-21	3	NTD	-
I1018V	2021-01-06	1	2020-09-18	1	-	-
S477I	2021-01-08	1	2020-04-04	136	RBD:RBM	-
I203V	2021-01-27	1	2020-04-12	2	NTD	-
V126F	2021-01-25	1	2020-08-28	2	NTD	-
A831S	2021-01-28	1	N/A	0	FP	-
E1262Y	2021-01-03	1	N/A	0	CT	-
D405Y	2020-12-10	1	2020-12-31	1	RBD:IBM	-
A288V	2021-01-30	1	2020-06-13	4	NTD	-
R683L	2021-01-08	1	2020-11-06	2	-	-
A672T	2021-01-21	1	N/A	0	-	-
E1188K	2021-01-02	1	N/A	0	HR2	-
N824S	2020-12-14	1	2020-03-25	2	FP	-
D586A	2021-01-02	1	N/A	0	-	-
V1060L	2021-01-19	1	2020-03-25	2	-	-
S1239I	2020-12-31	1	2020-06-29	2	CT	-
Q1180R	2021-01-16	1	N/A	0	HR2	-
P139L	2020-12-15	1	2020-11-26	1	NTD	-
I358L	2020-12-20	1	N/A	0	RBD	-
V539L	2020-12-24	1	N/A	0	RBD	-
K304Q	2021-01-08	1	N/A	0	-	-
T63A	2020-12-30	1	N/A	0	NTD	-
E702Q	2021-01-13	1	2020-10-20	7	-	-
Q498K	2021-01-11	1	N/A	0	RBD:RBM	-
F817S	2020-12-10	1	N/A	0	FP	-
T415N	2021-01-02	1	2020-10-11	1	RBD	-
L1197I	2021-01-04	1	N/A	0	HR2	-
E1092G	2021-01-16	1	N/A	0	-	-
K1157T	2021-01-20	1	2020-05-11	2	-	-
F759L	2021-01-20	1	N/A	0	-	-
V6F	2021-01-19	1	2020-03-29	16	SP	-
W1102L	2020-11-22	1	2020-04-06	8	-	-
H1159R	2021-01-04	1	2020-10-29	6	-	-
S98P	2020-12-18	1	2020-06-12	18	NTD	-
G639S	2021-01-09	1	2020-09-19	62	-	-
delY144Y145	2020-12-19	1	N/A	0	NTD	-
G1085E	2020-12-26	1	2020-03-29	1	-	-
S884C	2021-01-14	1	N/A	0	-	-
L10I	2021-01-25	1	2020-11-13	8	SP	-
R21S	2020-12-20	1	N/A	0	NTD	-
A1015del	2021-01-12	1	N/A	0	-	-
delL141G142V143Y144	2021-01-26	1	2020-03-30	27	NTD	-
K790R	2020-12-16	1	2020-10-16	2	-	-
E1150V	2020-12-30	1	N/A	0	-	-
T95A	2020-12-14	1	N/A	0	NTD	-
T1076I	2021-01-04	1	N/A	0	-	-
S50A	2021-01-19	1	N/A	0	NTD	-
A694T	2021-01-16	1	2020-04-17	2	-	-
V1065A	2021-01-18	1	2020-12-09	5	-	-
Q787H	2021-01-08	1	2020-03-23	8	-	-
W1102C	2021-01-15	1	2020-07-03	1	-	-
F486S	2021-01-28	1	N/A	0	RBD:RBM	-
V1176I	2021-01-18	1	N/A	0	HR2	-
D1199H	2020-12-17	1	2020-10-06	3	HR2	-
T676I	2020-12-15	1	2020-05-03	29	-	-
D215A	2021-01-28	1	N/A	0	NTD	-
Q23R	2020-12-16	1	2020-11-20	1	NTD	-
Q836H	2020-11-02	1	2020-04-02	19	FP	-
E96*	2021-01-04	1	N/A	0	NTD	-
A829S	2021-01-04	1	2020-03-28	2	FP	-
S884A	2021-01-30	1	N/A	0	-	-
G261S	2021-01-25	1	2020-11-06	56	NTD	-
Y200S	2020-12-26	1	N/A	0	NTD	-
A713V	2021-01-25	1	N/A	0	-	-
T22A	2021-01-13	1	2020-03-23	1	NTD	-
Q414L	2020-12-04	1	2020-09-19	1	RBD	mask
G268S	2021-01-21	1	N/A	0	NTD	-
V826M	2021-01-06	1	2020-03-15	1	FP	-
I569V	2021-01-12	1	2020-11-14	2	-	-
A1016T	2021-01-09	1	2020-09-10	1	-	-
Q14R	2021-01-16	1	2020-03-27	2	NTD	-
T630N	2021-01-05	1	N/A	0	-	-
T114A	2021-01-12	1	N/A	0	NTD	-
E406Q	2021-01-22	1	2020-03-30	3	RBD	-
F1103S	2021-01-14	1	N/A	0	-	-
C1248S	2021-01-03	1	N/A	0	CT	-
A626S	2021-01-11	1	2020-03-29	164	-	-
D1146G	2021-01-05	1	2020-10-15	12	-	-
P793L	2021-01-22	1	2020-07-23	3	-	-
D1163A	2021-01-23	1	2020-11-22	6	HR2	-
G381R	2021-01-15	1	N/A	0	RBD	-
N532I	2020-12-27	1	N/A	0	RBD	-
E619Q	2021-01-30	1	2020-04-14	2	-	-
delI818E819D820L821	2020-12-10	1	N/A	0	FP	-
I105T	2021-01-05	1	N/A	0	NTD	-
A647V	2021-01-02	1	2020-08-13	6	-	-
A93S	2021-01-23	1	2020-10-14	6	NTD	-
T618A	2021-01-22	1	2020-12-16	1	-	-
D1153G	2021-01-29	1	2020-08-21	3	-	-
V1033A	2020-12-31	1	2020-12-10	1	-	-
E516Q	2020-12-31	1	2020-11-13	5	RBD	-
Q690K	2021-01-24	1	2020-04-21	1	-	-
E180D	2021-01-08	1	2020-12-08	1	NTD	-
S940Y	2021-01-26	1	N/A	0	HR1	-
S349A	2021-01-08	1	N/A	0	RBD	-
F1103L	2020-12-10	1	2020-10-21	1	-	-
K529R	2021-01-09	1	2020-07-17	13	RBD	-
S12Y	2021-01-17	1	2020-10-21	9	SP	-
S929T	2021-01-24	1	2020-09-24	486	HR1	-
Q321R	2021-01-29	1	N/A	0	RBD	-
S172Y	2020-12-10	1	N/A	0	NTD	-
V90L	2020-12-22	1	2020-04-05	14	NTD	-
V1264*	2021-01-03	1	N/A	0	CT	-
F140S	2021-01-21	1	N/A	0	NTD	-
Y351F	2021-01-21	1	N/A	0	RBD	-
P39S	2021-01-12	1	N/A	0	NTD	-
I468M	2021-01-22	1	N/A	0	RBD:RBM	-
V213M	2021-01-11	1	2020-10-17	2	NTD	-
T415A	2021-01-12	1	N/A	0	RBD	-
T299A	2021-01-23	1	2020-06-08	3	NTD	-
I101V	2021-01-28	1	2020-11-11	4	NTD	-
G1219A	2021-01-10	1	N/A	0	TM	-
C1250Y	2020-12-21	1	N/A	0	CT	-
Q1005H	2020-12-22	1	2020-04-18	1	-	-
V6L	2021-01-08	1	2020-10-12	2	SP	-
V127I	2020-12-17	1	N/A	0	NTD	-
D215E	2021-01-10	1	2020-03-07	1	NTD	-
N641S	2021-01-03	1	2020-03-31	1	-	-
Q134E	2021-01-05	1	2020-12-06	1	NTD	-
T645A	2021-01-15	1	N/A	0	-	-
S112L	2021-01-21	1	2020-06-23	9	NTD	-
V722F	2021-01-17	1	N/A	0	-	-
V656I	2020-12-20	1	N/A	0	-	-
A123S	2021-01-25	1	N/A	0	NTD	-
P251S	2021-01-17	1	2020-04-10	2	NTD	-
A27T	2020-11-19	1	2020-09-01	67	NTD	-
V445I	2020-12-28	1	2020-04-02	3	RBD:RBM	-
D1118Q	2021-01-07	1	N/A	0	-	-
N1158H	2021-01-25	1	N/A	0	-	-
A1026S	2021-01-23	1	2020-04-10	10	-	-
G891V	2021-01-01	1	N/A	0	-	-
D80N	2021-01-18	1	2020-06-06	6	NTD	-
W886L	2021-01-09	1	N/A	0	-	-
Q779K	2021-01-21	1	2020-03-11	6	-	-
S1261F	2021-01-08	1	2020-05-18	7	CT	-
F486L	2021-01-20	1	N/A	0	RBD:RBM	-
N148Y	2021-01-29	1	N/A	0	NTD	-
D796E	2021-01-13	1	N/A	0	-	-
N448T	2021-01-22	1	N/A	0	RBD:RBM	-
delE619V620P621V622	2020-12-20	1	N/A	0	-	-
A942S	2021-01-08	1	2020-03-17	98	HR1	-
Q314L	2020-12-21	1	N/A	0	-	-
A893S	2021-01-06	1	N/A	0	-	-
D1184Y	2021-01-02	1	2020-09-10	5	HR2	-
G1267V	2020-12-02	1	2020-09-10	5	CT	-
V534F	2021-01-30	1	2020-11-05	3	RBD	caution
N641del	2020-12-31	1	N/A	0	-	-
L179I	2021-01-16	1	2020-05-09	6	NTD	-
G946R	2021-01-01	1	N/A	0	HR1	-
A684S	2021-01-23	1	2020-06-02	1	-	-
L1012S	2020-12-29	1	N/A	0	-	-
V62I	2020-12-14	1	2020-08-03	10	NTD	-
H146K	2020-12-29	1	N/A	0	NTD	-
E484A	2021-01-27	1	N/A	0	RBD:RBM	-
D1127Y	2021-01-29	1	2020-04-17	1	-	caution
Y266F	2021-01-21	1	N/A	0	NTD	-
W1217L	2020-12-18	1	2020-08-23	1	TM	-
N185S	2021-01-19	1	2020-04-07	12	NTD	-
K814R	2020-12-29	1	2020-10-05	6	-	-
F92I	2021-01-28	1	N/A	0	NTD	-
I1198L	2021-01-21	1	N/A	0	HR2	-
S112P	2021-02-01	1	2020-10-06	1	NTD	-
F855L	2021-01-20	1	2020-04-29	2	FP	-
A694V	2021-01-22	1	2020-04-01	9	-	-
T941I	2021-01-29	1	2020-06-29	3	HR1	-
E868V	2021-01-22	1	N/A	0	-	-
D215H	2021-01-12	1	2020-03-13	923	NTD	-
N460S	2021-01-25	1	N/A	0	RBD:RBM	-
ins246RDSW	2021-01-02	1	N/A	0	NTD	-
V16I	2021-01-09	1	2020-06-10	3	NTD	caution
Q493P	2021-01-12	1	N/A	0	RBD:RBM	-
D1184G	2021-01-25	1	2021-01-21	1	HR2	-
D53N	2021-01-20	1	N/A	0	NTD	-
Q183P	2021-01-16	1	N/A	0	NTD	-
A344V	2021-01-18	1	N/A	0	RBD	-
W152G	2021-01-10	1	N/A	0	NTD	-
R346G	2020-12-14	1	N/A	0	RBD	-
L54S	2021-01-26	1	N/A	0	NTD	-
V62L	2021-01-26	1	2020-11-03	1	NTD	-
A899S	2021-01-24	1	2020-04-02	6	-	-
V826L	2021-01-19	1	2020-03-27	27	FP	-
F1052L	2020-12-27	1	N/A	0	-	-
H245P	2021-01-18	1	N/A	0	NTD	-
I1179V	2021-01-27	1	2020-11-27	1	HR2	-
F58L	2021-01-14	1	N/A	0	NTD	-
T778A	2020-12-17	1	2020-03-20	2	-	-
Y449S	2021-02-03	1	N/A	0	RBD:RBM	-
S459P	2020-12-18	1	N/A	0	RBD:RBM	-
N74Y	2020-12-29	1	N/A	0	NTD	-
T1238A	2021-01-11	1	2020-11-01	4	CT	-
I1225S	2021-01-09	1	N/A	0	TM	-
R1185H	2021-01-03	1	2020-10-21	1	HR2	-
I326V	2020-12-28	1	N/A	0	RBD	-
V171F	2021-01-23	1	2020-05-28	9	NTD	-
R634L	2021-01-28	1	N/A	0	-	-
I128V	2021-01-22	1	2020-10-19	2	NTD	-
F1156L	2021-01-18	1	2020-03-26	4	-	-
Q52H	2021-01-30	1	2020-03-19	13	NTD	-
K378N	2021-01-29	1	2020-03-18	7	RBD	-
E1151D	2021-01-11	1	2020-11-02	2	-	-
G1251E	2021-01-29	1	2020-10-07	1	CT	-
L878S	2021-01-05	1	N/A	0	-	-
V367L	2021-01-27	1	2020-08-20	4	RBD	mask
E1017D	2021-01-29	1	N/A	0	-	-
Q580L	2021-01-28	1	N/A	0	-	caution
T167I	2020-12-13	1	N/A	0	NTD	-
S371P	2021-01-28	1	2020-08-31	1	RBD	-
E1262G	2021-01-13	1	2020-06-16	1	CT	-
N280S	2021-01-02	1	N/A	0	NTD	-
T73I	2021-01-30	1	N/A	0	NTD	-
H66Y	2021-01-22	1	N/A	0	NTD	-
E156G	2021-01-19	1	2020-11-02	1	NTD	-
V1060I	2021-01-12	1	2020-04-04	1	-	-
V976A	2021-01-23	1	N/A	0	-	-
A419T	2021-01-26	1	N/A	0	RBD	-
Y160N	2021-01-23	1	N/A	0	NTD	-
T604A	2021-01-13	1	N/A	0	-	-
S45T	2021-01-14	1	N/A	0	NTD	-
D1163V	2021-01-18	1	2020-10-25	1	HR2	-
N81Y	2020-12-17	1	N/A	0	NTD	-
G1099S	2021-01-14	1	2020-10-26	2	-	-
E1072K	2021-01-15	1	N/A	0	-	-
V42I	2021-01-18	1	2020-10-12	1	NTD	-
N710V	2021-01-25	1	N/A	0	-	-
G1093D	2021-02-03	1	N/A	0	-	-
I1114L	2021-01-29	1	N/A	0	-	-
S1175A	2021-01-29	1	N/A	0	HR2	-
T588I	2021-01-04	1	2020-11-19	1	-	-
V722I	2021-01-27	1	N/A	0	-	-
Y28H	2021-01-19	1	2020-04-07	13	NTD	-
A27P	2021-01-04	1	N/A	0	NTD	-
I332V	2021-01-27	1	N/A	0	RBD	-
I418V	2021-01-23	1	N/A	0	RBD	-
P272S	2021-01-12	1	2020-05-01	1	NTD	-
A783V	2021-01-24	1	2020-10-12	2	-	-
A903S	2020-12-10	1	2021-01-11	2	-	-
V772A	2020-12-14	1	N/A	0	-	-
S161A	2021-01-31	1	2020-06-20	1	NTD	-
T723N	2021-01-26	1	N/A	0	-	-
T632I	2020-12-23	1	2020-05-22	2	-	-
G496V	2021-01-24	1	N/A	0	RBD:RBM	-
N439S	2021-01-11	1	N/A	0	RBD:RBM	-
T572N	2021-01-14	1	2020-10-06	2	-	-
I720V	2021-01-04	1	2020-04-08	2	-	-
I788T	2021-01-23	1	N/A	0	-	-
L1234F	2021-01-26	1	2020-12-03	1	TM	-
S1097T	2020-11-08	1	N/A	0	-	-
K202R	2020-12-15	1	2020-04-16	1	NTD	-
delY145H146K147N148N149	2021-01-15	1	N/A	0	NTD	-
K444N	2021-01-26	1	2020-04-30	3	RBD:RBM	-
A852V	2021-01-19	1	2020-10-27	4	FP	-
Q218R	2020-12-14	1	2020-03-14	2	NTD	-
D428Y	2021-01-20	1	N/A	0	RBD	-
R567K	2021-01-17	1	N/A	0	-	-
A1226V	2021-01-10	1	2020-10-26	7	TM	-
S247N	2020-12-30	1	2020-11-02	4	NTD	-
D427H	2021-01-30	1	2020-11-11	2	RBD	-
M153V	2021-01-02	1	2020-03-31	19	NTD	-
D198Y	2020-12-24	1	N/A	0	NTD	-
K97N	2021-01-06	1	2020-04-10	11	NTD	-
V47F	2020-12-20	1	2020-04-29	1	NTD	-
L517V	2021-01-26	1	N/A	0	RBD	-
R214H	2021-01-09	1	2020-09-25	8	NTD	-
L48S	N/A	0	2020-06-17	1	NTD	-
Q853K	N/A	0	2020-11-05	1	FP	-
N907S	N/A	0	2020-11-11	3	-	-
N603D	N/A	0	2020-10-10	1	-	-
P1162R	N/A	0	2020-08-18	129	-	-
D796G	N/A	0	2020-10-07	1	-	-
L629V	N/A	0	2020-04-17	1	-	-
A1080S	N/A	0	2020-10-15	3	-	-
G75S	N/A	0	2020-11-08	7	NTD	-
V70A	N/A	0	2021-01-17	1	NTD	-
N121S	N/A	0	2020-04-25	1	NTD	-
L861del	N/A	0	2020-09-07	1	-	-
K921*	N/A	0	2020-05-22	3	HR1	-
Q493L	N/A	0	2020-11-04	1	RBD:RBM	-
K1245R	N/A	0	2020-06-09	4	CT	-
V1228A	N/A	0	2020-05-26	3	TM	-
N501T	N/A	0	2020-11-12	7	RBD:RBM	-
L226F	N/A	0	2020-06-29	5	NTD	-
G252S	N/A	0	2020-06-02	10	NTD	-
N1158S	N/A	0	2020-11-07	1	-	-
T1136I	N/A	0	2020-04-09	1	-	-
A570V	N/A	0	2020-04-06	31	-	-
P139S	N/A	0	2020-05-12	1	NTD	-
L1034I	N/A	0	2020-11-14	5	-	-
Q183R	N/A	0	2020-11-05	6	NTD	-
E484R	N/A	0	2020-08-12	2	RBD:RBM	-
L821I	N/A	0	2020-12-29	1	FP	-
D178Y	N/A	0	2020-09-21	1	NTD	-
E1111A	N/A	0	2021-01-02	1	-	-
I1132T	N/A	0	2020-06-20	1	-	-
delF140L141G142V143	N/A	0	2020-04-05	1	NTD	-
V143F	N/A	0	2020-07-17	17	NTD	-
L244F	N/A	0	2020-11-02	11	NTD	-
V860A	N/A	0	2020-04-19	3	-	-
T618S	N/A	0	2020-04-25	1	-	-
A1070T	N/A	0	2020-05-05	4	-	-
C1247S	N/A	0	2020-11-02	1	CT	-
V1189F	N/A	0	2020-04-08	2	HR2	-
K97Q	N/A	0	2020-06-04	2	NTD	-
N801S	N/A	0	2021-01-03	1	-	-
T1027S	N/A	0	2020-03-02	8	-	-
A123V	N/A	0	2020-04-18	5	NTD	-
S399P	N/A	0	2020-03-27	1	RBD	-
T95N	N/A	0	2020-04-29	2	NTD	-
L110F	N/A	0	2020-11-01	1	NTD	-
W1102del	N/A	0	2020-10-23	1	-	-
Y266S	N/A	0	2020-03-14	1	NTD	-
E918D	N/A	0	2020-10-16	1	-	-
D290E	N/A	0	2020-02-28	1	NTD	-
I844T	N/A	0	2021-01-07	1	FP	-
C1240F	N/A	0	2020-09-05	6	CT	-
ins248SHQ	N/A	0	2020-03-27	1	NTD	-
V445F	N/A	0	2020-12-05	1	RBD:RBM	-
T430A	N/A	0	2020-10-21	1	RBD	-
L241S	N/A	0	2020-11-25	1	NTD	-
F4del	N/A	0	2020-04-05	1	SP	-
S45F	N/A	0	2020-11-04	1	NTD	-
V382M	N/A	0	2020-05-01	1	RBD	-
R355S	N/A	0	2020-03-27	1	RBD	-
T747A	N/A	0	2020-04-01	1	-	-
I1115F	N/A	0	2020-10-24	1	-	-
M740L	N/A	0	2020-11-17	2	-	-
C1247R	N/A	0	2021-01-05	1	CT	-
I312F	N/A	0	2021-01-22	2	-	-
T1100I	N/A	0	2020-12-10	2	-	-
S155N	N/A	0	2020-11-01	2	NTD	-
Q613K	N/A	0	2020-07-02	1	-	-
A570S	N/A	0	2020-04-09	13	-	-
P57S	N/A	0	2020-10-21	5	NTD	-
A419S	N/A	0	2020-10-16	7	RBD	-
E1092A	N/A	0	2020-11-08	1	-	-
Q954R	N/A	0	2020-11-15	3	HR1	-
D839N	N/A	0	2020-05-25	2	FP	-
S711F	N/A	0	2020-10-11	6	-	-
L48F	N/A	0	2020-03-22	1	NTD	-
R1107K	N/A	0	2020-12-07	1	-	-
I692V	N/A	0	2020-12-10	2	-	-
I312V	N/A	0	2020-09-02	6	-	-
K776E	N/A	0	2020-11-03	1	-	-
S247G	N/A	0	2020-05-18	22	NTD	-
V83I	N/A	0	2020-07-15	57	NTD	-
D1260A	N/A	0	2020-12-13	3	CT	-
I312L	N/A	0	2020-07-23	4	-	-
D198H	N/A	0	2020-12-10	1	NTD	-
A892S	N/A	0	2020-03-21	34	-	-
W258S	N/A	0	2020-06-11	3	NTD	mask
V622A	N/A	0	2020-11-04	2	-	-
S659T	N/A	0	2020-11-17	2	-	-
A1015V	N/A	0	2020-10-21	1	-	-
S375P	N/A	0	2020-04-08	2	RBD	-
T732A	N/A	0	2020-10-15	28	-	-
P681L	N/A	0	2020-03-16	17	-	-
L242P	N/A	0	2020-11-12	6	NTD	-
T547A	N/A	0	2020-10-20	1	-	-
H519Y	N/A	0	2020-12-21	1	RBD	-
I931V	N/A	0	2020-04-05	2	HR1	-
N751D	N/A	0	2020-11-17	1	-	-
F1256X	N/A	0	2020-10-06	1	CT	-
P26T	N/A	0	2020-08-27	1	NTD	-
D1199G	N/A	0	2020-11-08	1	HR2	-
V1264M	N/A	0	2020-08-13	1	CT	-
E471Q	N/A	0	2020-06-11	10	RBD:RBM	-
F592S	N/A	0	2020-11-08	3	-	-
N17K	N/A	0	2020-10-24	2	NTD	-
A222F	N/A	0	2020-09-24	1	NTD	-
E554K	N/A	0	2020-12-01	3	-	-
Y396F	N/A	0	2021-01-31	1	RBD	-
N125S	N/A	0	2020-10-15	18	NTD	-
delP139F140L141G142V143Y144Y145	N/A	0	2020-11-08	4	NTD	-
A522P	N/A	0	2020-05-04	2	RBD	-
F220L	N/A	0	2020-11-12	1	NTD	-
M900I	N/A	0	2020-09-09	4	-	-
I1018M	N/A	0	2020-11-26	1	-	-
A879L	N/A	0	2020-11-10	1	-	-
E1202D	N/A	0	2020-11-01	14	HR2	-
S161T	N/A	0	2020-04-09	2	NTD	-
A1026T	N/A	0	2020-04-09	1	-	-
V36F	N/A	0	2020-10-12	4	NTD	-
V952F	N/A	0	2020-03-16	5	HR1	-
I1216S	N/A	0	2020-12-10	1	TM	-
S1021Y	N/A	0	2020-11-04	3	-	-
F65S	N/A	0	2020-12-13	1	NTD	-
delL141G142V143	N/A	0	2020-04-08	7	NTD	-
N536K	N/A	0	2020-11-11	1	RBD	-
E1111D	N/A	0	2020-04-11	1	-	-
N1134S	N/A	0	2020-12-10	1	-	-
R847I	N/A	0	2020-08-23	2	FP	-
Q218*	N/A	0	2020-04-04	1	NTD	-
H1058L	N/A	0	2020-03-31	3	-	-
L1049I	N/A	0	2020-11-03	4	-	-
E583Q	N/A	0	2020-04-05	90	-	-
E1202K	N/A	0	2020-09-29	7	HR2	-
K947R	N/A	0	2020-09-24	1	HR1	-
S691Y	N/A	0	2020-12-09	1	-	-
Y266C	N/A	0	2020-06-16	2	NTD	-
L335F	N/A	0	2020-04-19	6	RBD	-
I1018F	N/A	0	2020-03-31	1	-	-
L865F	N/A	0	2020-10-17	1	-	-
T470A	N/A	0	2020-06-04	10	RBD:RBM	-
I770V	N/A	0	2020-04-09	2	-	-
N481S	N/A	0	2020-12-11	7	RBD:RBM	-
F157S	N/A	0	2020-06-05	3	NTD	-
S659L	N/A	0	2020-08-27	31	-	-
Y1067*	N/A	0	2020-05-22	3	-	-
D568G	N/A	0	2021-01-11	1	-	-
R246S	N/A	0	2020-04-02	3	NTD	-
I850F	N/A	0	2020-03-11	1	FP	-
N370K	N/A	0	2020-11-09	4	RBD	-
E324Q	N/A	0	2020-11-17	1	RBD	-
T998I	N/A	0	2020-12-18	1	-	-
K814M	N/A	0	2020-12-11	1	-	-
A263S	N/A	0	2020-06-11	18	NTD	-
V1068F	N/A	0	2020-04-02	106	-	-
E156A	N/A	0	2020-09-11	45	NTD	-
C1253G	N/A	0	2020-06-10	1	CT	-
G1204V	N/A	0	2020-03-11	1	-	-
H69L	N/A	0	2020-04-03	3	NTD	-
N370S	N/A	0	2020-03-28	6	RBD	-
P295S	N/A	0	2020-04-03	1	NTD	-
Q613R	N/A	0	2020-04-22	1	-	-
N440Y	N/A	0	2020-10-11	8	RBD:RBM	-
A771D	N/A	0	2020-12-06	2	-	-
P85S	N/A	0	2020-10-04	4	NTD	-
V3F	N/A	0	2020-09-20	1	SP	-
T240S	N/A	0	2020-12-06	30	NTD	-
A701T	N/A	0	2020-09-27	2	-	-
Q607H	N/A	0	2020-03-22	6	-	-
D1259E	N/A	0	2020-11-16	2	CT	-
S60P	N/A	0	2020-09-16	1	NTD	-
L611F	N/A	0	2020-03-05	1	-	-
T19P	N/A	0	2020-04-19	1	NTD	-
R78G	N/A	0	2020-05-04	3	NTD	-
T1027N	N/A	0	2020-11-18	1	-	-
E1258D	N/A	0	2020-12-11	1	CT	-
K1157N	N/A	0	2020-08-20	1	-	-
V47A	N/A	0	2020-11-06	1	NTD	-
D428V	N/A	0	2020-11-17	1	RBD	-
I805L	N/A	0	2020-11-07	1	-	-
K41E	N/A	0	2020-11-22	2	NTD	-
N30S	N/A	0	2020-11-02	1	NTD	-
K1045N	N/A	0	2020-09-11	4	-	-
A1026V	N/A	0	2020-06-03	3	-	-
D80A	N/A	0	2020-03-27	78	NTD	-
A352D	N/A	0	2020-11-11	2	RBD	-
N925Y	N/A	0	2020-05-05	1	HR1	-
G72R	N/A	0	2020-04-17	32	NTD	-
K462T	N/A	0	2020-11-04	5	RBD:RBM	-
P1112L	N/A	0	2020-04-23	5	-	-
G75C	N/A	0	2020-11-04	1	NTD	-
F306L	N/A	0	2020-12-05	60	-	-
G1167D	N/A	0	2020-09-03	12	HR2	-
D428G	N/A	0	2021-01-26	1	RBD	-
V915del	N/A	0	2020-04-15	1	-	-
V1228I	N/A	0	2020-06-12	5	TM	-
I1210T	N/A	0	2020-08-26	1	-	-
T307A	N/A	0	2021-01-19	1	-	-
G885D	N/A	0	2020-07-25	3	-	-
K790N	N/A	0	2020-04-17	1	-	-
L585F	N/A	0	2020-04-04	6	-	-
F1042I	N/A	0	2020-11-13	1	-	-
F32S	N/A	0	2020-10-08	1	NTD	caution
D1084H	N/A	0	2020-05-09	2	-	-
T696A	N/A	0	2020-12-14	1	-	-
I692F	N/A	0	2021-01-22	1	-	-
delL1197I1198D1199L1200	N/A	0	2020-04-12	1	HR2	-
N603I	N/A	0	2020-12-07	1	-	-
I870V	N/A	0	2020-03-25	14	-	-
Q493H	N/A	0	2020-11-11	1	RBD:RBM	-
T307N	N/A	0	2020-05-10	5	-	-
V951del	N/A	0	2020-05-13	1	HR1	-
D950Y	N/A	0	2020-04-03	3	HR1	-
S371T	N/A	0	2020-10-30	5	RBD	-
D839Y	N/A	0	2020-02-29	61	FP	-
D427G	N/A	0	2020-10-06	14	RBD	-
Q271*	N/A	0	2020-08-24	1	NTD	-
V915I	N/A	0	2020-03-24	11	-	-
P1079T	N/A	0	2020-11-05	2	-	-
D1184N	N/A	0	2020-05-05	3	HR2	-
delN679S680P681R682R683A684R685S686	N/A	0	2020-01-29	2	-	-
N540S	N/A	0	2020-10-18	3	RBD	-
V308I	N/A	0	2020-11-09	1	-	-
I231V	N/A	0	2020-11-17	2	NTD	-
N1192D	N/A	0	2020-11-01	2	HR2	-
K786R	N/A	0	2020-12-18	1	-	-
V976F	N/A	0	2020-03-29	6	-	-
N955H	N/A	0	2020-05-09	10	HR1	-
T1238N	N/A	0	2020-04-10	1	CT	-
T1100K	N/A	0	2020-04-30	1	-	-
P521R	N/A	0	2020-06-16	2	RBD	-
R466I	N/A	0	2020-11-03	1	RBD:RBM	-
N211S	N/A	0	2020-09-16	4	NTD	-
A829V	N/A	0	2020-11-01	7	FP	-
W64C	N/A	0	2020-11-05	2	NTD	-
delD1146S1147F1148	N/A	0	2020-10-20	1	-	-
A123T	N/A	0	2020-12-20	2	NTD	-
K1205Q	N/A	0	2020-07-12	6	-	-
C1247G	N/A	0	2020-04-24	6	CT	-
V159F	N/A	0	2020-04-29	1	NTD	-
S875F	N/A	0	2020-10-27	2	-	-
Q1071L	N/A	0	2020-04-27	6	-	-
I850V	N/A	0	2020-08-17	2	FP	-
Q1113E	N/A	0	2020-11-14	2	-	-
T549A	N/A	0	2020-05-22	71	-	-
D808G	N/A	0	2020-10-21	7	-	-
I105L	N/A	0	2020-04-09	4	NTD	-
K1205R	N/A	0	2020-10-15	1	-	-
I651V	N/A	0	2021-01-02	1	-	-
N440K	N/A	0	2020-08-31	21	RBD:RBM	-
S1239T	N/A	0	2020-03-24	5	CT	-
N354K	N/A	0	2020-08-23	4	RBD	-
I1115V	N/A	0	2020-10-23	5	-	-
A706S	N/A	0	2020-07-15	13	-	-
L1141F	N/A	0	2020-11-12	2	-	-
P174H	N/A	0	2020-10-25	4	NTD	-
L1063F	N/A	0	2020-04-08	46	-	-
S803L	N/A	0	2020-11-02	1	-	-
N679K	N/A	0	2020-09-28	27	-	-
G842S	N/A	0	2020-11-14	5	FP	-
V1133A	N/A	0	2020-10-20	6	-	-
V785A	N/A	0	2020-04-08	1	-	-
L822I	N/A	0	2020-04-02	2	FP	-
E1144A	N/A	0	2021-01-27	3	-	-
E554G	N/A	0	2020-02-16	8	-	-
N460K	N/A	0	2020-10-21	1	RBD:RBM	-
G75R	N/A	0	2020-07-14	8	NTD	-
A575T	N/A	0	2020-11-08	1	-	-
Q414R	N/A	0	2020-04-02	8	RBD	mask
D737Y	N/A	0	2020-10-27	3	-	-
V327F	N/A	0	2020-04-02	1	RBD	-
H1101N	N/A	0	2020-06-15	1	-	-
Q409H	N/A	0	2020-08-28	1	RBD	-
I468T	N/A	0	2020-05-02	1	RBD:RBM	-
K733R	N/A	0	2020-12-21	2	-	-
T33A	N/A	0	2020-08-09	5	NTD	-
G1085A	N/A	0	2020-04-10	2	-	-
D820H	N/A	0	2020-11-13	1	FP	-
G1099C	N/A	0	2020-04-24	1	-	-
D627N	N/A	0	2020-08-18	2	-	-
V120F	N/A	0	2020-06-12	2	NTD	-
V1040G	N/A	0	2020-05-07	1	-	-
T73N	N/A	0	2020-11-14	1	NTD	-
A352S	N/A	0	2020-10-15	11	RBD	-
A626V	N/A	0	2020-06-28	26	-	-
F329L	N/A	0	2020-12-12	4	RBD	-
N164D	N/A	0	2020-09-10	1	NTD	-
T286A	N/A	0	2020-04-11	1	NTD	-
Q779E	N/A	0	2020-03-19	1	-	-
K1045E	N/A	0	2020-10-24	3	-	-
I584V	N/A	0	2020-07-18	3	-	-
E96G	N/A	0	2020-10-16	26	NTD	-
I934M	N/A	0	2020-03-24	1	HR1	-
L7F	N/A	0	2020-11-17	1	SP	-
C131F	N/A	0	2020-04-19	1	NTD	-
Y269H	N/A	0	2020-09-09	6	NTD	-
Q779L	N/A	0	2020-10-06	7	-	-
T1231P	N/A	0	2020-10-27	2	TM	-
E1092D	N/A	0	2020-10-15	1	-	-
T678S	N/A	0	2020-04-10	1	-	-
T500S	N/A	0	2020-11-05	1	RBD:RBM	-
I850T	N/A	0	2020-11-01	16	FP	-
P9T	N/A	0	2020-04-04	3	SP	-
N1178K	N/A	0	2020-11-14	1	HR2	-
P863L	N/A	0	2020-09-10	1	-	-
Q218P	N/A	0	2020-11-06	1	NTD	-
G261D	N/A	0	2020-08-10	2	NTD	-
K558Q	N/A	0	2020-11-28	1	-	-
Q321L	N/A	0	2020-11-05	3	RBD	-
N925D	N/A	0	2020-08-05	1	HR1	-
E471G	N/A	0	2020-08-23	4	RBD:RBM	-
delA942S943A944L945	N/A	0	2020-11-01	1	HR1	-
K41R	N/A	0	2020-12-01	1	NTD	-
S1097L	N/A	0	2020-04-22	1	-	-
V503I	N/A	0	2020-08-11	1	RBD:RBM	-
T778N	N/A	0	2020-10-17	4	-	-
S596R	N/A	0	2020-11-07	2	-	-
G885C	N/A	0	2020-10-17	1	-	-
L611I	N/A	0	2020-04-06	1	-	-
H1088R	N/A	0	2020-10-27	1	-	-
N658D	N/A	0	2020-03-23	4	-	-
L276P	N/A	0	2020-04-03	1	NTD	caution
L699V	N/A	0	2020-08-10	1	-	-
R1039K	N/A	0	2020-04-25	1	-	-
G404C	N/A	0	2020-06-08	1	RBD:IBM	-
N925K	N/A	0	2020-12-12	2	HR1	-
T768N	N/A	0	2020-11-05	6	-	-
N556Y	N/A	0	2020-10-13	1	-	-
T618R	N/A	0	2020-11-04	7	-	-
T376S	N/A	0	2020-11-14	1	RBD	-
L141V	N/A	0	2020-11-12	7	NTD	-
L517I	N/A	0	2020-11-11	1	RBD	-
D867N	N/A	0	2020-11-04	2	-	-
T208S	N/A	0	2020-12-11	3	NTD	-
P1162A	N/A	0	2020-04-11	2	-	-
D1153V	N/A	0	2020-09-01	1	-	-
A1174V	N/A	0	2020-08-10	120	HR2	-
K776R	N/A	0	2020-11-07	2	-	-
delE132F133	N/A	0	2020-04-02	1	NTD	-
L212S	N/A	0	2020-04-26	5	NTD	-
C1253F	N/A	0	2020-07-06	290	CT	-
S982L	N/A	0	2020-11-12	1	-	-
I670L	N/A	0	2020-04-22	11	-	-
W1214G	N/A	0	2020-09-04	1	TM	mask
E780D	N/A	0	2020-04-08	1	-	-
delY38P39D40K41V42F43R44S45S46V47L48H49S50T51Q52D53L54F55L56P57F58F59S60N61V62T63W64F65H66A67I68H69V70S71G72T73N74G75T76	N/A	0	2020-09-09	1	NTD	-
G832F	N/A	0	2020-11-22	1	FP	-
Q779R	N/A	0	2020-10-10	3	-	-
T323L	N/A	0	2020-06-15	2	RBD	-
V729A	N/A	0	2020-04-16	1	-	-
T1117A	N/A	0	2020-09-27	1	-	-
delG667A668G669I670C671A672S673	N/A	0	2020-12-06	1	-	-
K1255N	N/A	0	2020-09-25	1	CT	-
V83A	N/A	0	2020-11-20	1	NTD	-
Q414K	N/A	0	2020-06-14	22	RBD	mask
R403S	N/A	0	2020-04-10	1	RBD:IBM	-
A263T	N/A	0	2020-09-14	2	NTD	-
N450D	N/A	0	2020-08-17	2	RBD:RBM	-
Y204H	N/A	0	2020-11-20	3	NTD	-
D867G	N/A	0	2020-03-29	11	-	-
V36L	N/A	0	2020-10-13	1	NTD	-
R765L	N/A	0	2020-03-18	17	-	caution
G219F	N/A	0	2020-06-11	1	NTD	-
H1159Y	N/A	0	2020-04-08	6	-	-
N282S	N/A	0	2020-05-28	4	NTD	-
N540D	N/A	0	2020-11-17	5	RBD	-
N460I	N/A	0	2020-10-03	2	RBD:RBM	-
K97T	N/A	0	2020-10-23	1	NTD	-
F1075L	N/A	0	2020-11-14	1	-	-
P272H	N/A	0	2020-10-20	25	NTD	-
N211T	N/A	0	2020-11-23	1	NTD	-
G485S	N/A	0	2020-04-10	1	RBD:RBM	-
K187E	N/A	0	2020-11-17	2	NTD	-
delP139F140L141G142V143Y144	N/A	0	2020-05-01	3	NTD	-
E868G	N/A	0	2020-10-22	5	-	-
I934L	N/A	0	2020-11-19	1	HR1	-
E1202V	N/A	0	2020-05-27	1	HR2	-
N1187I	N/A	0	2020-11-14	2	HR2	-
A260S	N/A	0	2020-10-07	1	NTD	-
G799V	N/A	0	2020-11-12	5	-	-
P25H	N/A	0	2020-12-16	1	NTD	-
S221P	N/A	0	2020-03-31	1	NTD	-
P681S	N/A	0	2020-03-24	11	-	-
Y473F	N/A	0	2020-04-28	1	RBD:RBM	-
G1044*	N/A	0	2020-09-16	1	-	-
N1023Y	N/A	0	2020-04-28	1	-	-
K150T	N/A	0	2020-04-14	2	NTD	-
L1270S	N/A	0	2020-10-26	1	CT	-
D215G	N/A	0	2020-05-08	62	NTD	-
S297L	N/A	0	2020-03-04	2	NTD	-
L24del	N/A	0	2020-08-25	10	NTD	-
K537T	N/A	0	2020-09-28	1	RBD	-
A623T	N/A	0	2020-11-06	1	-	-
T676P	N/A	0	2020-10-30	1	-	-
G1223S	N/A	0	2020-12-14	1	TM	-
S45P	N/A	0	2020-05-17	2	NTD	-
I923M	N/A	0	2020-04-10	1	HR1	-
R246T	N/A	0	2020-09-10	4	NTD	-
D215V	N/A	0	2020-08-25	20	NTD	-
S943T	N/A	0	2020-11-07	1	HR1	-
V320A	N/A	0	2020-03-24	4	RBD	mask
N188T	N/A	0	2021-01-03	1	NTD	-
V143I	N/A	0	2020-11-05	2	NTD	-
F135V	N/A	0	2020-04-22	1	NTD	-
S1249F	N/A	0	2020-10-22	1	CT	-
H207Y	N/A	0	2020-10-19	3	NTD	-
Q52L	N/A	0	2020-03-27	16	NTD	-
S151T	N/A	0	2020-10-20	3	NTD	-
L861V	N/A	0	2020-10-27	1	-	-
S708F	N/A	0	2020-03-11	6	-	-
F855S	N/A	0	2020-11-23	2	FP	-
T676N	N/A	0	2020-12-03	1	-	-
G932S	N/A	0	2020-10-19	2	HR1	-
S1175L	N/A	0	2020-03-30	3	HR2	-
Y313H	N/A	0	2020-10-16	2	-	caution
V120A	N/A	0	2020-12-16	1	NTD	-
I934V	N/A	0	2020-11-17	1	HR1	-
V860F	N/A	0	2020-09-02	2	-	-
K304R	N/A	0	2020-04-12	1	-	-
F565S	N/A	0	2020-10-13	2	-	-
D796H	N/A	0	2020-04-28	30	-	-
P792L	N/A	0	2020-04-18	1	-	-
F1121L	N/A	0	2020-04-01	2	-	-
E154Q	N/A	0	2020-04-09	4	NTD	-
V1128A	N/A	0	2020-11-08	2	-	-
H655R	N/A	0	2020-05-21	2	-	-
V1133L	N/A	0	2020-05-20	7	-	-
A262T	N/A	0	2020-11-13	1	NTD	-
D574X	N/A	0	2020-04-11	1	-	-
delF140L141G142	N/A	0	2020-07-03	1	NTD	-
A783E	N/A	0	2020-11-23	1	-	-
I119V	N/A	0	2020-05-06	27	NTD	-
K558R	N/A	0	2020-10-26	1	-	-
K811N	N/A	0	2020-11-19	1	-	-
F1220I	N/A	0	2020-08-31	1	TM	-
E471A	N/A	0	2020-11-08	1	RBD:RBM	-
S161Y	N/A	0	2020-10-29	2	NTD	-
F220I	N/A	0	2020-04-13	6	NTD	-
S691P	N/A	0	2020-04-05	2	-	-
S162G	N/A	0	2020-04-20	1	NTD	-
T723I	N/A	0	2020-08-02	666	-	-
L1244F	N/A	0	2020-09-24	4	CT	-
delQ14C15V16	N/A	0	2020-10-09	1	NTD	-
D364N	N/A	0	2020-08-26	3	RBD	-
Y200H	N/A	0	2020-08-06	1	NTD	-
K1073R	N/A	0	2020-11-04	2	-	-
delG142V143Y144	N/A	0	2020-04-17	5	NTD	-
N532Y	N/A	0	2020-10-13	1	RBD	-
D950N	N/A	0	2020-04-08	4	HR1	-
delT1231I1232M1233L1234C1235C1236M1237T1238S1239C1240C1241S1242C1243L1244K1245G1246C1247	N/A	0	2020-10-20	1	CT	-
A944V	N/A	0	2020-08-18	1	HR1	-
S937L	N/A	0	2020-03-23	14	HR1	-
G1131del	N/A	0	2020-04-03	1	-	-
F906V	N/A	0	2020-04-21	1	-	-
T761R	N/A	0	2020-12-05	1	-	-
I100M	N/A	0	2020-04-26	2	NTD	-
delL244H245R246S247	N/A	0	2020-12-08	2	NTD	-
F888L	N/A	0	2020-06-19	37	-	-
C1248Y	N/A	0	2020-08-09	5	CT	-
R1091L	N/A	0	2020-04-05	6	-	-
Q580H	N/A	0	2020-09-01	1	-	caution
T1116I	N/A	0	2020-04-16	2	-	-
Q173K	N/A	0	2020-04-05	10	NTD	-
delQ675T676Q677	N/A	0	2020-12-10	1	-	-
L1218P	N/A	0	2020-11-04	2	TM	-
F1220del	N/A	0	2020-12-26	1	TM	-
L1024F	N/A	0	2020-04-02	4	-	-
S1249P	N/A	0	2020-10-22	3	CT	-
D111del	N/A	0	2020-10-21	1	NTD	-
G1035V	N/A	0	2020-09-28	2	-	-
P561T	N/A	0	2020-11-08	1	-	-
C1240S	N/A	0	2020-05-11	2	CT	-
S494A	N/A	0	2020-10-27	3	RBD:RBM	-
V622I	N/A	0	2020-04-15	1	-	-
N1158D	N/A	0	2021-01-29	2	-	-
R273K	N/A	0	2020-04-07	1	NTD	-
K529N	N/A	0	2021-01-12	3	RBD	-
N536S	N/A	0	2020-10-03	8	RBD	-
N164S	N/A	0	2020-11-26	1	NTD	-
Q804H	N/A	0	2020-09-10	1	-	-
R78S	N/A	0	2020-08-26	13	NTD	-
D820N	N/A	0	2020-06-20	1	FP	-
S1196F	N/A	0	2020-04-18	1	HR2	-
N450K	N/A	0	2020-03-27	11	RBD:RBM	-
V722A	N/A	0	2020-06-20	1	-	-
T333I	N/A	0	2020-10-05	1	RBD	-
S256P	N/A	0	2020-09-20	11	NTD	caution
N188S	N/A	0	2020-11-25	1	NTD	-
V1128F	N/A	0	2020-03-30	3	-	-
P26R	N/A	0	2020-05-11	5	NTD	-
D830Y	N/A	0	2020-03-26	2	FP	-
F1109L	N/A	0	2020-05-14	9	-	-
G482A	N/A	0	2020-11-02	1	RBD:RBM	-
C1241Y	N/A	0	2020-06-01	1	CT	-
R682W	N/A	0	2020-04-19	2	-	-
Q183E	N/A	0	2020-06-14	1	NTD	-
Q690R	N/A	0	2020-10-06	12	-	-
E1195D	N/A	0	2020-09-28	2	HR2	-
P807T	N/A	0	2020-10-29	2	-	-
D427Y	N/A	0	2020-04-06	7	RBD	-
Q613del	N/A	0	2020-04-14	1	-	-
V171I	N/A	0	2020-11-12	1	NTD	-
Y789*	N/A	0	2020-04-13	1	-	-
P715S	N/A	0	2020-11-17	1	-	-
K77*	N/A	0	2020-05-22	3	NTD	-
I1081M	N/A	0	2021-01-07	6	-	-
E516*	N/A	0	2020-11-04	1	RBD	-
S750G	N/A	0	2020-11-06	1	-	-
I1232V	N/A	0	2020-03-28	3	TM	-
S813N	N/A	0	2020-04-08	3	-	-
D1163X	N/A	0	2020-04-12	1	HR2	-
T19K	N/A	0	2020-06-04	98	NTD	-
L981F	N/A	0	2021-01-02	1	-	-
E1188V	N/A	0	2020-09-24	1	HR2	-
M1229T	N/A	0	2020-04-29	160	TM	-
I233M	N/A	0	2020-09-16	2	NTD	-
S758T	N/A	0	2020-06-10	1	-	-
N1187T	N/A	0	2020-12-12	1	HR2	-
A348V	N/A	0	2020-11-01	1	RBD	-
L189F	N/A	0	2020-08-19	280	NTD	-
T250A	N/A	0	2020-10-03	1	NTD	-
D1127G	N/A	0	2020-04-09	3	-	caution
P1079A	N/A	0	2020-11-01	1	-	-
E1202G	N/A	0	2020-08-28	2	HR2	-
I285T	N/A	0	2020-03-31	1	NTD	caution
W1214X	N/A	0	2020-12-18	1	TM	mask
G1171D	N/A	0	2020-10-16	16	HR2	-
S680P	N/A	0	2020-10-21	3	-	-
G446X	N/A	0	2020-11-16	1	RBD:RBM	-
R1014I	N/A	0	2020-12-19	2	-	-
G1131V	N/A	0	2020-04-08	1	-	-
S1055L	N/A	0	2020-10-09	1	-	-
V539I	N/A	0	2020-11-07	17	RBD	-
E1188A	N/A	0	2020-04-10	3	HR2	-
I584L	N/A	0	2020-09-24	1	-	-
Q183H	N/A	0	2020-04-03	1	NTD	-
T724I	N/A	0	2020-04-12	1	-	-
A163T	N/A	0	2020-10-26	4	NTD	-
P807S	N/A	0	2020-10-05	2	-	-
N969S	N/A	0	2020-12-04	1	HR1	-
M697I	N/A	0	2020-11-09	1	-	-
V1065L	N/A	0	2020-06-08	4	-	-
I1018T	N/A	0	2020-11-30	1	-	-
N148D	N/A	0	2020-04-26	5	NTD	-
D1165N	N/A	0	2020-10-11	2	HR2	-
V1230A	N/A	0	2020-11-02	2	TM	-
Q218K	N/A	0	2020-11-18	1	NTD	-
Y396H	N/A	0	2020-10-16	3	RBD	-
R567S	N/A	0	2020-09-24	1	-	-
N481K	N/A	0	2020-10-16	11	RBD:RBM	-
delP1213W1214Y1215I1216W1217L1218G1219F1220I1221A1222G1223L1224I1225A1226I1227V1228M1229V1230T1231I1232M1233L1234C1235C1236M1237T1238S1239C1240C1241S1242	N/A	0	2020-10-19	1	CT	-
L229F	N/A	0	2020-10-07	5	NTD	-
delI210	N/A	0	2020-11-04	1	NTD	-
K854M	N/A	0	2020-06-07	2	FP	-
H1088Q	N/A	0	2020-11-02	1	-	-
L179P	N/A	0	2020-05-18	5	NTD	-
K182N	N/A	0	2020-11-02	4	NTD	-
E1111K	N/A	0	2020-09-08	4	-	-
delV62T63W64F65H66A67I68H69V70S71G72T73N74	N/A	0	2020-04-27	2	NTD	-
P1112R	N/A	0	2020-09-17	1	-	-
G482S	N/A	0	2020-10-24	3	RBD:RBM	-
D427V	N/A	0	2020-11-08	12	RBD	-
A1174S	N/A	0	2020-10-30	2	HR2	-
P1112S	N/A	0	2020-11-18	1	-	-
delE1207Q1208Y1209I1210	N/A	0	2020-11-02	1	-	-
Q913H	N/A	0	2020-08-21	5	-	-
V320F	N/A	0	2020-06-17	3	RBD	mask
A706P	N/A	0	2020-11-04	2	-	-
G798S	N/A	0	2020-10-16	32	-	-
G476F	N/A	0	2020-09-19	1	RBD:RBM	-
Q954K	N/A	0	2020-08-14	37	HR1	-
E281K	N/A	0	2020-03-25	2	NTD	-
Y248S	N/A	0	2020-11-08	3	NTD	-
P499S	N/A	0	2020-05-18	2	RBD:RBM	-
N439K	N/A	0	2020-04-08	2300	RBD:RBM	-
I726T	N/A	0	2020-10-16	2	-	-
D80H	N/A	0	2020-11-26	3	NTD	-
N188H	N/A	0	2020-05-07	1	NTD	-
G219D	N/A	0	2020-04-29	1	NTD	-
M177K	N/A	0	2020-05-06	1	NTD	-
T250S	N/A	0	2020-11-13	5	NTD	-
I870T	N/A	0	2020-04-09	3	-	-
delN641V642	N/A	0	2020-04-15	2	-	-
G142C	N/A	0	2020-03-30	3	NTD	-
G946A	N/A	0	2020-11-13	1	HR1	-
C1253Y	N/A	0	2020-11-02	1	CT	-
S13N	N/A	0	2020-04-20	6	NTD	-
R408T	N/A	0	2020-09-23	3	RBD	-
T109del	N/A	0	2020-04-09	1	NTD	-
T761P	N/A	0	2020-04-03	1	-	-
D1153H	N/A	0	2020-04-14	1	-	-
Q1208R	N/A	0	2020-11-09	1	-	-
F175L	N/A	0	2020-11-02	1	NTD	-
delY1272T1273	N/A	0	2020-09-26	1	CT	-
T1009S	N/A	0	2020-05-13	1	-	-
delT240L241L242	N/A	0	2020-09-24	1	NTD	-
Q23H	N/A	0	2020-09-21	372	NTD	-
I68T	N/A	0	2020-04-10	11	NTD	-
Q895H	N/A	0	2020-11-08	1	-	-
V620F	N/A	0	2020-10-19	1	-	-
V1104I	N/A	0	2020-04-17	7	-	-
T604Y	N/A	0	2020-10-22	6	-	-
N122K	N/A	0	2020-11-17	2	NTD	-
V70F	N/A	0	2020-05-26	18	NTD	-
Q173H	N/A	0	2020-04-01	2	NTD	-
Q690H	N/A	0	2020-11-08	43	-	-
M902V	N/A	0	2020-04-12	1	-	-
delT109L110	N/A	0	2020-08-10	1	NTD	-
W1214F	N/A	0	2020-05-30	1	TM	mask
V11I	N/A	0	2020-05-11	8	SP	-
I203del	N/A	0	2020-11-18	1	NTD	-
V1129L	N/A	0	2020-10-14	2	-	-
G889V	N/A	0	2020-04-09	1	-	-
K854R	N/A	0	2021-01-14	1	FP	-
D1127A	N/A	0	2020-11-02	1	-	caution
N370D	N/A	0	2020-09-23	2	RBD	-
Q23K	N/A	0	2020-12-29	1	NTD	-
N1125D	N/A	0	2020-10-21	1	-	-
D138N	N/A	0	2021-01-05	4	NTD	-
T859N	N/A	0	2020-09-07	230	-	-
D1259H	N/A	0	2020-04-19	1	CT	-
I235T	N/A	0	2020-11-27	1	NTD	-
V1228del	N/A	0	2020-05-18	2	TM	-
A688S	N/A	0	2020-03-30	6	-	-
Y248F	N/A	0	2020-10-07	2	NTD	-
K310R	N/A	0	2020-11-14	14	-	-
A890S	N/A	0	2021-01-05	1	-	-
E1262K	N/A	0	2020-10-02	1	CT	-
Q1208K	N/A	0	2020-11-17	1	-	-
V1264A	N/A	0	2020-04-23	1	CT	-
K1245E	N/A	0	2020-10-06	2	CT	-
T588S	N/A	0	2020-12-26	2	-	-
S673T	N/A	0	2020-08-17	15	-	-
K1255T	N/A	0	2021-01-18	2	CT	-
T19R	N/A	0	2020-11-18	1	NTD	-
T719S	N/A	0	2020-11-22	1	-	-
E654D	N/A	0	2020-04-18	24	-	-
K814E	N/A	0	2020-03-17	4	-	-
T1116N	N/A	0	2020-04-07	1	-	-
V483L	N/A	0	2020-09-18	3	RBD:RBM	-
I203M	N/A	0	2020-04-20	1	NTD	-
A222P	N/A	0	2020-09-25	1	NTD	-
A520T	N/A	0	2020-11-07	1	RBD	-
N536D	N/A	0	2020-11-09	1	RBD	-
L699F	N/A	0	2020-10-04	1	-	-
I472L	N/A	0	2020-12-20	1	RBD:RBM	-
N164T	N/A	0	2020-09-23	776	NTD	-
M869I	N/A	0	2020-11-04	6	-	-
H245del	N/A	0	2020-05-03	1	NTD	-
G257C	N/A	0	2020-12-29	1	NTD	-
V503A	N/A	0	2020-11-23	1	RBD:RBM	-
A846S	N/A	0	2020-05-12	143	FP	-
S721G	N/A	0	2020-11-11	1	-	-
D253Y	N/A	0	2020-06-13	9	NTD	-
F186S	N/A	0	2020-11-22	4	NTD	-
D1146E	N/A	0	2020-08-17	3	-	-
H207R	N/A	0	2020-06-22	26	NTD	-
N603K	N/A	0	2020-09-24	1	-	-
I197S	N/A	0	2021-01-01	2	NTD	-
L1265P	N/A	0	2020-04-22	3	CT	-
G880S	N/A	0	2020-04-18	1	-	-
A264T	N/A	0	2021-01-13	1	NTD	-
H146del	N/A	0	2020-04-16	1	NTD	-
Q853H	N/A	0	2020-11-02	1	FP	-
K1073E	N/A	0	2020-10-11	9	-	-
N211del	N/A	0	2020-04-02	1	NTD	-
S708A	N/A	0	2020-05-08	1	-	-
Q1201H	N/A	0	2020-10-19	6	HR2	-
G103C	N/A	0	2020-09-20	1	NTD	-
K529M	N/A	0	2020-04-12	8	RBD	-
K921del	N/A	0	2020-07-09	1	HR1	-
delT51Q52D53L54F55L56	N/A	0	2020-11-01	1	NTD	-
D40N	N/A	0	2020-11-25	1	NTD	-
G838V	N/A	0	2020-04-28	2	FP	-
V987F	N/A	0	2020-12-10	1	-	-
L249S	N/A	0	2020-04-09	20	NTD	-
A1190S	N/A	0	2020-03-31	1	HR2	-
D936N	N/A	0	2020-11-14	6	HR1	-
V83F	N/A	0	2020-04-10	7	NTD	-
L948I	N/A	0	2020-10-05	10	HR1	-
K1154I	N/A	0	2020-12-17	1	-	-
H146L	N/A	0	2020-04-22	1	NTD	-
I1210M	N/A	0	2020-06-08	2	-	-
delD138P139F140L141G142V143Y144	N/A	0	2020-05-06	3	NTD	-
S1030A	N/A	0	2020-10-11	1	-	-
K206R	N/A	0	2020-11-14	1	NTD	-
F377del	N/A	0	2020-08-21	1	RBD	-
T874I	N/A	0	2020-09-17	3	-	-
V401L	N/A	0	2020-11-10	1	RBD	-
V171A	N/A	0	2020-10-11	2	NTD	-
T553A	N/A	0	2020-11-20	2	-	-
K1149M	N/A	0	2020-03-23	1	-	-
V382L	N/A	0	2020-05-11	4	RBD	-
S305T	N/A	0	2020-04-07	1	-	-
Q677L	N/A	0	2020-07-12	3	-	-
P561S	N/A	0	2020-10-21	38	-	-
T73A	N/A	0	2020-10-15	1	NTD	-
E132Q	N/A	0	2020-11-03	15	NTD	-
R158K	N/A	0	2020-10-31	1	NTD	-
N1135Y	N/A	0	2020-03-11	1	-	-
A924S	N/A	0	2020-04-10	19	HR1	-
Q804K	N/A	0	2020-06-14	2	-	-
Q784L	N/A	0	2020-11-08	2	-	-
G252D	N/A	0	2020-12-19	1	NTD	-
S810P	N/A	0	2020-09-27	2	-	-
Y489H	N/A	0	2020-08-25	1	RBD:RBM	-
delQ14C15V16N17L18	N/A	0	2020-04-27	1	NTD	-
A262P	N/A	0	2020-07-18	1	NTD	-
N334K	N/A	0	2020-06-16	5	RBD	-
S689R	N/A	0	2020-10-21	7	-	-
L1197R	N/A	0	2020-10-09	1	HR2	-
N709K	N/A	0	2020-11-11	1	-	-
E324A	N/A	0	2020-10-20	1	RBD	-
K458Q	N/A	0	2020-11-14	2	RBD:RBM	-
W1214L	N/A	0	2020-04-03	1	TM	mask
Q1071K	N/A	0	2020-10-30	1	-	-
G1171V	N/A	0	2020-06-05	1	HR2	-
R1107M	N/A	0	2020-10-22	3	-	-
D979H	N/A	0	2020-04-19	1	-	caution
F1062L	N/A	0	2020-12-27	1	-	-
E661G	N/A	0	2020-10-22	2	-	-
V1094A	N/A	0	2020-11-02	1	-	-
P631H	N/A	0	2020-12-19	1	-	-
D1257Y	N/A	0	2020-11-09	1	CT	-
L806V	N/A	0	2020-10-21	2	-	-
F338L	N/A	0	2020-07-14	31	RBD	-
F2L	N/A	0	2020-03-30	8	SP	-
S698A	N/A	0	2020-09-24	3	-	-
S637F	N/A	0	2020-10-14	2	-	-
G1085V	N/A	0	2021-01-05	1	-	-
T307S	N/A	0	2020-03-20	15	-	-
N1187S	N/A	0	2020-10-29	1	HR2	-
T1160I	N/A	0	2020-02-28	10	-	-
I1198V	N/A	0	2020-11-30	1	HR2	-
Q920R	N/A	0	2021-01-04	1	HR1	-
C743R	N/A	0	2020-07-03	1	-	-
N164H	N/A	0	2020-08-17	1	NTD	-
D290V	N/A	0	2020-03-20	1	NTD	-
F1103C	N/A	0	2020-06-24	1	-	-
A694F	N/A	0	2020-10-04	9	-	-
Q949L	N/A	0	2021-01-09	1	HR1	-
L938I	N/A	0	2020-03-27	15	HR1	-
L117I	N/A	0	2020-09-25	1	NTD	-
N658K	N/A	0	2020-10-21	3	-	-
R634C	N/A	0	2020-11-03	1	-	-
E619D	N/A	0	2020-06-18	3	-	-
L24V	N/A	0	2020-11-04	4	NTD	-
V159I	N/A	0	2020-10-05	22	NTD	-
Q134H	N/A	0	2020-11-09	1	NTD	-
D290Y	N/A	0	2020-03-07	1	NTD	-
Q690L	N/A	0	2020-08-24	1	-	-
E1031D	N/A	0	2020-09-20	2	-	-
T724A	N/A	0	2020-12-08	1	-	-
K147I	N/A	0	2020-12-09	1	NTD	-
A930V	N/A	0	2021-01-09	1	HR1	-
G72W	N/A	0	2020-03-31	2	NTD	-
E654V	N/A	0	2020-11-14	1	-	-
ins98KAE	N/A	0	2020-06-12	1	NTD	-
L452Q	N/A	0	2020-06-07	2	RBD:RBM	-
S813G	N/A	0	2020-02-16	5	-	-
I231L	N/A	0	2020-04-26	6	NTD	-
N440S	N/A	0	2020-10-06	1	RBD:RBM	-
T638I	N/A	0	2020-06-15	4	-	-
K986R	N/A	0	2020-06-09	28	-	-
F643L	N/A	0	2020-11-03	5	-	-
N824T	N/A	0	2020-05-05	1	FP	-
T912A	N/A	0	2020-11-11	2	-	-
delA260G261A262	N/A	0	2020-11-04	1	NTD	-
N1187H	N/A	0	2020-11-04	1	HR2	-
L518S	N/A	0	2020-11-04	1	RBD	-
A262D	N/A	0	2020-04-27	1	NTD	-
N1194H	N/A	0	2020-11-02	8	HR2	-
Q218L	N/A	0	2020-05-10	1	NTD	-
ins264Y	N/A	0	2020-03-05	3	NTD	-
T259K	N/A	0	2020-09-18	1	NTD	-
R78K	N/A	0	2020-10-29	1	NTD	-
P217T	N/A	0	2020-03-11	1	NTD	-
C1236S	N/A	0	2020-08-25	7	TM	-
S325F	N/A	0	2020-04-21	5	RBD	-
K1045M	N/A	0	2020-09-10	1	-	-
W104F	N/A	0	2020-11-05	21	NTD	-
I693V	N/A	0	2020-07-19	4	-	-
delT33R34G35V36Y37	N/A	0	2020-09-09	1	NTD	-
Q804P	N/A	0	2020-11-23	1	-	-
N280I	N/A	0	2021-01-02	1	NTD	-
N928D	N/A	0	2020-10-13	1	HR1	-
E554V	N/A	0	2020-12-19	1	-	-
F135L	N/A	0	2020-10-30	2	NTD	-
T478R	N/A	0	2020-10-19	21	RBD:RBM	-
[truncated: 232 more rows]

## Sheet: Mutations by ID @ Figs. 5, 6
GISAID Accession ID	Collection date	Mutations	Is B.1.1.7
EPI_ISL_661759	2020-11-12	delH69V70,Y145del,N501Y,A570D,D614G,P681H,T716I,S982A,D1118H	TRUE
EPI_ISL_647445	2020-11-01	delH69V70,Y145del,N501Y,A570D,D614G,P681H,T716I,S982A,D1118H	TRUE
EPI_ISL_659415	2020-11-05	delH69V70,Y145del,N501Y,A570D,D614G,P681H,T716I,S982A,D1118H	TRUE
EPI_ISL_673712	2020-11-15	delH69V70,Y145del,N501Y,A570D,D614G,P681H,T716I,S982A,D1118H	TRUE
EPI_ISL_661750	2020-11-14	delH69V70,Y145del,N501Y,A570D,D614G,P681H,T716I,S982A,D1118H	TRUE
EPI_ISL_661721	2020-11-11	delH69V70,Y145del,N501Y,A570D,D614G,P681H,T716I,S982A,D1118H	TRUE
EPI_ISL_659430	2020-11-05	delH69V70,Y145del,N501Y,A570D,D614G,P681H,T716I,S982A,D1118H	TRUE
EPI_ISL_661789	2020-11-11	delH69V70,Y145del,N501Y,A570D,D614G,P681H,T716I,S982A,D1118H	TRUE
EPI_ISL_661739	2020-11-14	delH69V70,Y145del,N501Y,A570D,D614G,P681H,T716I,S982A,D1118H	TRUE
EPI_ISL_661794	2020-11-14	delH69V70,Y145del,N501Y,A570D,D614G,P681H,T716I,S982A,D1118H	TRUE
EPI_ISL_661793	2020-11-14	delH69V70,Y145del,N501Y,A570D,D614G,P681H,T716I,S982A,D1118H	TRUE
EPI_ISL_658120	2020-11-08	delH69V70,Y145del,N501Y,A570D,D614G,P681H,T716I,S982A,D1118H	TRUE
EPI_ISL_658112	2020-11-06	delH69V70,Y145del,N501Y,A570D,D614G,P681H,T716I,S982A,D1118H	TRUE
EPI_ISL_661797	2020-11-11	delH69V70,Y145del,N501Y,A570D,D614G,P681H,T716I,S982A,D1118H	TRUE
EPI_ISL_661779	2020-11-12	delH69V70,Y145del,N501Y,A570D,D614G,P681H,T716I,S982A,D1118H	TRUE
EPI_ISL_661769	2020-11-14	delH69V70,Y145del,N501Y,A570D,D614G,P681H,T716I,S982A,D1118H	TRUE
EPI_ISL_658116	2020-11-08	delH69V70,Y145del,N501Y,A570D,D614G,P681H,T716I,S982A,D1118H	TRUE
EPI_ISL_659412	2020-11-05	delH69V70,Y145del,N501Y,A570D,D614G,P681H,T716I,S982A,D1118H	TRUE
EPI_ISL_658153	2020-11-09	delH69V70,Y145del,N501Y,A570D,D614G,P681H,T716I,S982A,D1118H	TRUE
EPI_ISL_659435	2020-11-06	delH69V70,Y145del,N501Y,A570D,D614G,P681H,T716I,S982A,D1118H	TRUE
EPI_ISL_673703	2020-11-15	delH69V70,Y145del,N501Y,A570D,D614G,P681H,T716I,S982A,D1118H	TRUE
EPI_ISL_661729	2020-11-11	delH69V70,Y145del,N501Y,A570D,D614G,P681H,A706V,T716I,S982A,D1118H	TRUE
EPI_ISL_629665	2020-10-21	delH69V70,Y145del,N501Y,A570D,D614G,P681H,T716I,S982A,D1118H	TRUE
EPI_ISL_659421	2020-11-05	delH69V70,Y145del,N501Y,A570D,D614G,P681H,T716I,S982A,D1118H	TRUE
EPI_ISL_661774	2020-11-14	delH69V70,Y145del,N501Y,A570D,D614G,P681H,T716I,S982A,D1118H	TRUE
EPI_ISL_661752	2020-11-11	delH69V70,Y145del,N501Y,A570D,D614G,P681H,T716I,S982A,D1118H	TRUE
EPI_ISL_661743	2020-11-11	delH69V70,Y145del,N501Y,A570D,D614G,P681H,T716I,S982A,D1118H	TRUE
EPI_ISL_659481	2020-11-05	delH69V70,Y145del,N501Y,A570D,D614G,P681H,T716I,S982A,D1118H	TRUE
EPI_ISL_661732	2020-11-11	delH69V70,Y145del,N501Y,A570D,D614G,P681H,T716I,S982A,D1118H	TRUE
EPI_ISL_659411	2020-11-05	delH69V70,Y145del,N501Y,A570D,D614G,P681H,T716I,S982A,D1118H	TRUE
EPI_ISL_581117	2020-09-21	delH69V70,Y145del,N501Y,A570D,D614G,P681H,T716I,S982A,D1118H	TRUE
EPI_ISL_667926	2020-11-12	delH69V70,Y145del,N501Y,A570D,D614G,P681H,T716I,S982A,D1118H	TRUE
EPI_ISL_659422	2020-11-05	delH69V70,Y145del,N501Y,A570D,D614G,P681H,T716I,S982A,D1118H	TRUE
EPI_ISL_673746	2020-11-13	delH69V70,Y145del,N501Y,A570D,D614G,P681H,T716I,S982A,D1118H	TRUE
EPI_ISL_661747	2020-11-11	delH69V70,Y145del,N501Y,A570D,D614G,P681H,T716I,S982A,D1118H	TRUE
EPI_ISL_673724	2020-11-15	delH69V70,Y145del,N501Y,A570D,D614G,P681H,T716I,S982A,D1118H	TRUE
EPI_ISL_673728	2020-11-15	delH69V70,Y145del,N501Y,A570D,D614G,P681H,T716I,S982A,D1118H	TRUE
EPI_ISL_705004	2020-11-20	delH69V70,Y145del,N501Y,A570D,D614G,P681H,T716I,S982A,D1118H	TRUE
EPI_ISL_673748	2020-11-15	delH69V70,Y145del,N501Y,A570D,D614G,P681H,T716I,S982A,D1118H	TRUE
EPI_ISL_673783	2020-11-15	delH69V70,Y145del,N501Y,A570D,D614G,P681H,T716I,S982A,D1118H	TRUE
EPI_ISL_673700	2020-11-15	delH69V70,Y145del,N501Y,A570D,D614G,P681H,T716I,S982A,D1118H	TRUE
EPI_ISL_673752	2020-11-15	delH69V70,Y145del,N501Y,A570D,D614G,P681H,T716I,S982A,D1118H	TRUE
EPI_ISL_705007	2020-12-04	delH69V70,N501Y,A570D,D614G,P681H,T716I,S982A,D1118H	TRUE
EPI_ISL_705019	2020-11-22	delH69V70,Y145del,D287G,N501Y,A570D,D614G,P681H,T716I,S982A,D1118H	TRUE
EPI_ISL_673778	2020-11-13	delH69V70,Y145del,N501Y,A570D,D614G,P681H,T716I,S982A,D1118H	TRUE
EPI_ISL_673749	2020-11-15	delH69V70,Y145del,N501Y,A570D,D614G,P681H,A706V,T716I,S982A,D1118H	TRUE
EPI_ISL_673754	2020-11-15	delH69V70,Y145del,N501Y,A570D,D614G,P681H,T716I,S982A,D1118H	TRUE
EPI_ISL_673723	2020-11-15	delH69V70,Y145del,N501Y,A570D,D614G,P681H,T716I,S982A,D1118H	TRUE
EPI_ISL_705033	2020-11-22	delH69V70,Y145del,N501Y,A570D,D614G,P681H,T716I,S982A,D1118H	TRUE
EPI_ISL_708999	2020-12-04	delH69V70,Y145del,N501Y,A570D,D614G,P681H,T716I,S982A,D1118H	TRUE
EPI_ISL_673780	2020-11-15	delH69V70,Y145del,N501Y,A570D,D614G,P681H,T716I,S982A,D1118H	TRUE
EPI_ISL_705020	2020-11-22	delH69V70,Y145del,N501Y,A570D,D614G,P681H,T716I,S982A,D1118H	TRUE
EPI_ISL_705000	2020-11-22	delH69V70,Y145del,N501Y,A570D,D614G,P681H,T716I,S982A,D1118H	TRUE
EPI_ISL_708998	2020-11-29	delH69V70,Y145del,N501Y,A570D,D614G,P681H,T716I,S982A,D1118H	TRUE
EPI_ISL_705008	2020-11-22	delH69V70,Y145del,N501Y,A570D,D614G,P681H,T716I,S982A,D1118H	TRUE
EPI_ISL_705039	2020-11-22	delH69V70,Y145del,N501Y,A570D,D614G,P681H,T716I,S982A,D1118H	TRUE
EPI_ISL_708993	2020-12-04	delH69V70,Y145del,N501Y,A570D,D614G,P681H,T716I,S982A,D1118H	TRUE
EPI_ISL_708995	2020-12-04	delH69V70,Y145del,N501Y,A570D,D614G,P681H,T716I,S982A,D1118H	TRUE
EPI_ISL_705022	2020-11-22	delH69V70,Y145del,N501Y,A570D,D614G,P681H,T716I,S982A,D1118H	TRUE
EPI_ISL_708964	2020-11-30	delH69V70,Y145del,N501Y,A570D,D614G,P681H,T716I,S982A,D1118H	TRUE
EPI_ISL_705029	2020-11-22	delH69V70,Y145del,N501Y,A570D,D614G,P681H,T716I,S982A,D1118H	TRUE
EPI_ISL_705071	2020-11-22	delH69V70,Y145del,N501Y,A570D,D614G,P681H,T716I,S982A,D1118H	TRUE
EPI_ISL_673781	2020-11-15	delH69V70,Y145del,N501Y,A570D,D614G,P681H,T716I,S982A,D1118H	TRUE
EPI_ISL_705069	2020-11-21	delH69V70,Y145del,N501Y,A570D,D614G,P681H,T716I,S982A,D1118H	TRUE
EPI_ISL_705017	2020-11-22	delH69V70,Y145del,N501Y,A570D,D614G,P681H,T716I,S982A,D1118H	TRUE
EPI_ISL_708970	2020-12-02	delH69V70,Y145del,N501Y,A570D,D614G,P681H,T716I,S982A,D1118H	TRUE
EPI_ISL_705063	2020-11-22	delH69V70,Y145del,N501Y,A570D,D614G,P681H,T716I,S982A,D1118H	TRUE
EPI_ISL_705065	2020-11-22	delH69V70,Y145del,N501Y,A570D,D614G,P681H,T716I,S982A,D1118H	TRUE
EPI_ISL_705001	2020-11-22	delH69V70,Y145del,N501Y,A570D,D614G,P681H,T716I,A852S,S982A,D1118H	TRUE
EPI_ISL_708963	2020-11-30	delH69V70,Y145del,N501Y,A570D,D614G,P681H,T716I,S982A,D1118H	TRUE
EPI_ISL_705079	2020-11-22	delH69V70,Y145del,N501Y,A570D,D614G,P681H,T716I,S982A,D1118H	TRUE
EPI_ISL_718318	2020-12-10	delH69V70,Y145del,N501Y,A570D,D614G,P681H,T716I,S982A,D1118H	TRUE
EPI_ISL_708990	2020-12-04	delH69V70,Y145del,N501Y,A570D,D614G,P681H,T716I,S982A,D1118H	TRUE
EPI_ISL_708997	2020-12-04	delH69V70,Y145del,N501Y,A570D,D614G,P681H,T716I,S982A,D1118H	TRUE
EPI_ISL_708994	2020-12-04	delH69V70,Y145del,N501Y,A570D,D614G,P681H,T716I,S982A,A1020S,D1118H	TRUE
EPI_ISL_708969	2020-11-30	delH69V70,Y145del,N501Y,A570D,D614G,P681H,T716I,S982A,D1118H	TRUE
EPI_ISL_718322	2020-12-10	delH69V70,Y145del,N501Y,A570D,D614G,P681H,T716I,S982A,D1118H	TRUE
EPI_ISL_718333	2020-12-10	delH69V70,Y145del,N501Y,A570D,D614G,P681H,T716I,S982A,D1118H	TRUE
EPI_ISL_718319	2020-12-10	delH69V70,Y145del,N501Y,A570D,D614G,P681H,T716I,S982A,D1118H	TRUE
EPI_ISL_718336	2020-12-10	delH69V70,Y145del,N501Y,A570D,D614G,P681H,T716I,S982A,D1118H	TRUE
EPI_ISL_718320	2020-12-10	delH69V70,Y145del,N501Y,A570D,D614G,P681H,T716I,S982A,D1118H	TRUE
EPI_ISL_718323	2020-12-10	delH69V70,Y145del,N501Y,A570D,D614G,P681H,T716I,S982A,D1118H	TRUE
EPI_ISL_718328	2020-12-10	delH69V70,Y145del,N501Y,A570D,D614G,P681H,T716I,S982A,D1118H	TRUE
EPI_ISL_718329	2020-12-10	delH69V70,Y145del,N501Y,A570D,D614G,P681H,T716I,S982A,D1118H	TRUE
EPI_ISL_718321	2020-12-10	delH69V70,Y145del,N501Y,A570D,D614G,P681H,T716I,S982A,D1118H	TRUE
EPI_ISL_718325	2020-12-10	delH69V70,Y145del,N501Y,A570D,D614G,P681H,T716I,S982A,D1118H	TRUE
EPI_ISL_718327	2020-12-10	delH69V70,Y145del,N501Y,A570D,D614G,P681H,T716I,S982A,D1118H	TRUE
EPI_ISL_718324	2020-12-10	delH69V70,Y145del,N501Y,A570D,D614G,P681H,T716I,S982A,D1118H	TRUE
EPI_ISL_718335	2020-12-10	delH69V70,Y145del,N501Y,A570D,D614G,P681H,T716I,S982A,D1118H	TRUE
EPI_ISL_708991	2020-12-05	delH69V70,Y145del,N501Y,A570D,D614G,P681H,T716I,S982A,D1118H	TRUE
EPI_ISL_718330	2020-12-10	delH69V70,Y145del,N501Y,A570D,D614G,P681H,T716I,S982A,D1118H	TRUE
EPI_ISL_718342	2020-12-10	delH69V70,Y145del,N501Y,A570D,D614G,P681H,T716I,S982A,D1118H	TRUE
EPI_ISL_708975	2020-11-30	delH69V70,Y145del,N501Y,A570D,D614G,P681H,T716I,S982A,D1118H	TRUE
EPI_ISL_718341	2020-12-10	delH69V70,Y145del,N501Y,A570D,D614G,P681H,T716I,S982A,D1118H	TRUE
EPI_ISL_718340	2020-12-10	delH69V70,Y145del,N501Y,A570D,D614G,P681H,T716I,S982A,D1118H	TRUE
EPI_ISL_718346	2020-12-10	delH69V70,Y145del,N501Y,A570D,D614G,P681H,T716I,S982A,D1118H	TRUE
EPI_ISL_718373	2020-12-10	delH69V70,D138H,Y145del,N501Y,A570D,D614G,P681H,T716I,S982A,D1118H	TRUE
EPI_ISL_718372	2020-12-10	delH69V70,Y145del,N501Y,A570D,D614G,P681H,T716I,S982A,D1118H	TRUE
EPI_ISL_718349	2020-12-10	delH69V70,Y145del,N501Y,A570D,D614G,P681H,T716I,S982A,D1118H	TRUE
EPI_ISL_718343	2020-12-10	delH69V70,Y145del,N501Y,A570D,D614G,P681H,T716I,S982A,D1118H	TRUE
EPI_ISL_720629	2020-11-17	delH69V70,Y145del,N501Y,A570D,D614G,P681H,T716I,D1118H	TRUE
EPI_ISL_718371	2020-12-10	delH69V70,Y145del,N501Y,A570D,D614G,P681H,T716I,S982A,D1118H	TRUE
EPI_ISL_718347	2020-12-10	delH69V70,Y145del,N501Y,A570D,D614G,P681H,T716I,S982A,D1118H	TRUE
EPI_ISL_718370	2020-12-10	delH69V70,Y145del,N501Y,A570D,D614G,P681H,T716I,S982A,D1118H	TRUE
EPI_ISL_718375	2020-12-10	delH69V70,Y145del,N501Y,A570D,D614G,P681H,T716I,S982A,D1118H	TRUE
EPI_ISL_718348	2020-12-10	delH69V70,Y145del,N501Y,A570D,D614G,P681H,T716I,S982A,D1118H	TRUE
EPI_ISL_718388	2020-12-10	delH69V70,Y145del,N501Y,A570D,D614G,P681H,T716I,S982A,D1118H	TRUE
EPI_ISL_718374	2020-12-10	delH69V70,Y145del,N501Y,A570D,D614G,P681H,T716I,S982A,D1118H	TRUE
EPI_ISL_720602	2020-11-17	delH69V70,Y145del,N501Y,A570D,D614G,P681H,T716I,S982A,D1118H	TRUE
EPI_ISL_720617	2020-11-18	delH69V70,Y145del,N501Y,A570D,D614G,P681H,T716I,S982A,D1118H	TRUE
EPI_ISL_719601	2020-12-10	delH69V70,Y145del,N501Y,A570D,D614G,P681H,T716I,S982A,D1118H	TRUE
EPI_ISL_719603	2020-12-10	delH69V70,Y145del,N501Y,A570D,D614G,P681H,T716I,S982A,D1118H	TRUE
EPI_ISL_720613	2020-11-18	delH69V70,Y145del,N501Y,A570D,D614G,P681H,T716I,S982A,D1118H	TRUE
EPI_ISL_720633	2020-11-18	delH69V70,Y145del,N501Y,A570D,D614G,P681H,T716I,S982A,D1118H	TRUE
EPI_ISL_718377	2020-12-10	delH69V70,Y145del,N501Y,A570D,D614G,P681H,T716I,S982A,D1118H	TRUE
EPI_ISL_720601	2020-11-18	delH69V70,Y145del,N501Y,A570D,D614G,P681H,T716I,S982A,D1118H	TRUE
EPI_ISL_720638	2020-11-17	delH69V70,Y145del,N501Y,A570D,D614G,P681H,T716I,S982A,D1118H	TRUE
EPI_ISL_720634	2020-11-17	delH69V70,Y145del,N501Y,A570D,D614G,P681H,T716I,S982A,D1118H	TRUE
EPI_ISL_720664	2020-11-17	delH69V70,Y145del,N501Y,A570D,D614G,P681H,T716I,S982A,D1118H	TRUE
EPI_ISL_720649	2020-11-17	delH69V70,Y145del,N501Y,A570D,D614G,P681H,T716I,S982A,D1118H	TRUE
EPI_ISL_720614	2020-11-17	delH69V70,Y145del,N501Y,A570D,D614G,P681H,T716I,S982A,D1118H	TRUE
EPI_ISL_720641	2020-11-17	delH69V70,Y145del,N501Y,A570D,D614G,P681H,T716I,S982A,D1118H	TRUE
EPI_ISL_720647	2020-11-17	delH69V70,Y145del,N501Y,A570D,D614G,P681H,T716I,S982A,D1118H	TRUE
EPI_ISL_720699	2020-12-01	delH69V70,Y145del,N501Y,A570D,D614G,P681H,T716I,S982A,D1118H	TRUE
EPI_ISL_731304	2020-12-09	delH69V70,Y145del,N501Y,A570D,D614G,P681H,T716I,S982A,D1118H	TRUE
EPI_ISL_718387	2020-12-10	delH69V70,Y145del,N501Y,A570D,D614G,P681H,T716I,S982A,D1118H	TRUE
EPI_ISL_720608	2020-11-18	delH69V70,Y145del,N501Y,A570D,D614G,P681H,T716I,S982A,D1118H	TRUE
EPI_ISL_731303	2020-12-09	delH69V70,Y145del,N501Y,A570D,D614G,P681H,T716I,S982A,D1118H	TRUE
EPI_ISL_724190	2020-11-21	delH69V70,Y145del,N501Y,A570D,D614G,P681H,T716I,S982A,D1118H	TRUE
EPI_ISL_720689	2020-12-03	delH69V70,Y145del,N501Y,A570D,D614G,P681H,T716I,S982A,D1118H	TRUE
EPI_ISL_731350	2020-12-09	delH69V70,Y145del,N501Y,A570D,D614G,P681H,T716I,S982A,D1118H	TRUE
EPI_ISL_720659	2020-11-17	delH69V70,Y145del,N501Y,A570D,D614G,P681H,T716I,S982A,D1118H	TRUE
EPI_ISL_731300	2020-12-09	delH69V70,Y145del,N501Y,A570D,D614G,P681H,T716I,D1118H	TRUE
EPI_ISL_720693	2020-12-03	delH69V70,Y145del,N501Y,A570D,D614G,P681H,T716I,S982A,D1118H	TRUE
EPI_ISL_724199	2020-11-21	delH69V70,Y145del,N501Y,A570D,D614G,P681H,T716I,S982A,D1118H	TRUE
EPI_ISL_720692	2020-12-02	delH69V70,Y145del,N501Y,A570D,D614G,P681H,T716I,S982A,D1118H	TRUE
EPI_ISL_731310	2020-12-11	delH69V70,Y145del,N501Y,A570D,D614G,P681H,T716I,S982A,D1118H	TRUE
EPI_ISL_731337	2020-12-10	delH69V70,Y145del,N501Y,A570D,D614G,P681H,T716I,S982A,D1118H	TRUE
EPI_ISL_731306	2020-12-09	delH69V70,Y145del,N501Y,A570D,D614G,P681H,T716I,S982A,D1118H	TRUE
EPI_ISL_731357	2020-12-11	delH69V70,Y145del,N501Y,A570D,D614G,P681H,T716I,S982A,D1118H	TRUE
EPI_ISL_724192	2020-11-21	delH69V70,Y145del,N501Y,A570D,D614G,P681H,T716I,S982A,D1118H	TRUE
EPI_ISL_733907	2020-12-02	delH69V70,Y145del,A222V,N501Y,A570D,D614G,P681H,T716I,S982A,D1118H	TRUE
EPI_ISL_731347	2020-12-16	delH69V70,Y145del,N501Y,A570D,D614G,P681H,T716I,S982A,D1118H	TRUE
EPI_ISL_731356	2020-12-08	delH69V70,Y145del,N501Y,A570D,D614G,P681H,T716I,S982A,D1118H	TRUE
EPI_ISL_731348	2020-12-09	delH69V70,Y145del,N501Y,A570D,D614G,P681H,T716I,S982A,D1118H	TRUE
EPI_ISL_731301	2020-12-08	delH69V70,Y145del,N501Y,A570D,D614G,P681H,T716I,S982A,D1118H	TRUE
EPI_ISL_733908	2020-12-08	delH69V70,Y145del,N501Y,A570D,D614G,P681H,T716I,S982A,D1118H	TRUE
EPI_ISL_731338	2020-12-10	delH69V70,Y145del,N501Y,A570D,D614G,P681H,T716I,S982A,D1118H	TRUE
EPI_ISL_733905	2020-12-07	delH69V70,Y145del,N501Y,A570D,D614G,P681H,T716I,S982A,D1118H	TRUE
EPI_ISL_733917	2020-12-11	delH69V70,Y145del,N501Y,A570D,D614G,P681H,T716I,S982A,D1118H	TRUE
EPI_ISL_733915	2020-12-08	delH69V70,Y145del,N501Y,A570D,D614G,P681H,T716I,S982A,D1118H	TRUE
EPI_ISL_733947	2020-12-11	delH69V70,Y145del,N501Y,A570D,D614G,P681H,T716I,S982A,D1118H	TRUE
EPI_ISL_733938	2020-12-11	delH69V70,Y145del,N501Y,A570D,D614G,P681H,T716I,S982A,D1118H	TRUE
EPI_ISL_736175	2020-12-14	delH69V70,Y145del,N501Y,A570D,D614G,P681H,T716I,S982A,D1118H	TRUE
EPI_ISL_733921	2020-12-11	delH69V70,Y145del,N501Y,A570D,D614G,P681H,T716I,S982A,D1118H	TRUE
EPI_ISL_733949	2020-12-11	delH69V70,Y145del,N501Y,A570D,D614G,P681H,T716I,S982A,D1118H	TRUE
EPI_ISL_733936	2020-12-11	delH69V70,Y145del,N501Y,A570D,D614G,P681H,T716I,S982A,D1118H	TRUE
EPI_ISL_731311	2020-12-09	delH69V70,Y145del,N501Y,A570D,D614G,P681H,T716I,S982A,D1118H	TRUE
EPI_ISL_736171	2020-12-13	delH69V70,Y145del,N501Y,A570D,D614G,P681H,T716I,S982A,D1118H	TRUE
EPI_ISL_736170	2020-12-13	delH69V70,V143del,Y144F,N501Y,A570D,D614G,P681H,T716I,S982A,D1118H	TRUE
EPI_ISL_733952	2020-12-11	delH69V70,Y145del,N501Y,A570D,D614G,P681H,T716I,S982A,D1118H	TRUE
EPI_ISL_733960	2020-12-11	delH69V70,Y145del,N501Y,A570D,D614G,P681H,T716I,S982A,D1118H	TRUE
EPI_ISL_736174	2020-12-12	delH69V70,Y145del,N501Y,A570D,D614G,P681H,T716I,S982A,D1118H	TRUE
EPI_ISL_736181	2020-12-13	delH69V70,Y145del,N501Y,A570D,D614G,P681H,T716I,S982A,D1118H	TRUE
EPI_ISL_756653	2020-12-17	delH69V70,Y145del,N501Y,A570D,D614G,P681H,T716I,S982A,D1118H	TRUE
EPI_ISL_736172	2020-12-14	delH69V70,Y145del,N501Y,A570D,D614G,P681H,T716I,S982A,D1118H	TRUE
EPI_ISL_736191	2020-12-14	delH69V70,Y145del,N501Y,A570D,D614G,P681H,T716I,S982A,D1118H	TRUE
EPI_ISL_733965	2020-12-11	delH69V70,Y145del,N501Y,A570D,D614G,P681H,T716I,S982A,D1118H	TRUE
EPI_ISL_736188	2020-12-13	delH69V70,Y145del,N501Y,A570D,D614G,P681H,T716I,S982A,D1118H	TRUE
EPI_ISL_756600	2020-12-16	delH69V70,Y145del,N501Y,A570D,D614G,P681H,T716I,S982A,D1118H	TRUE
EPI_ISL_736190	2020-12-14	delH69V70,Y145del,N501Y,A570D,D614G,P681H,T716I,S982A,D1118H	TRUE
EPI_ISL_756649	2020-12-17	delH69V70,Y145del,N501Y,A570D,D614G,P681H,T716I,S982A,D1118H	TRUE
EPI_ISL_756601	2020-12-17	delH69V70,Y145del,N501Y,A570D,D614G,P681H,T716I,S982A,D1118H	TRUE
EPI_ISL_756654	2020-12-16	delH69V70,Y145del,N501Y,A570D,D614G,P681H,T716I,S982A,D1118H	TRUE
EPI_ISL_736177	2020-12-13	delH69V70,Y145del,N501Y,A570D,D614G,P681H,T716I,S982A,D1118H	TRUE
EPI_ISL_736186	2020-12-13	delH69V70,Y145del,N501Y,A570D,D614G,P681H,T716I,S982A,D1118H	TRUE
EPI_ISL_736179	2020-12-13	delH69V70,Y145del,N501Y,A570D,D614G,P681H,T716I,S982A,D1118H	TRUE
EPI_ISL_756656	2020-12-16	delH69V70,Y145del,N501Y,A570D,D614G,P681H,T716I,S982A,D1118H	TRUE
EPI_ISL_756652	2020-12-17	delH69V70,Y145del,N501Y,A570D,D614G,P681H,T716I,S982A,D1118H	TRUE
EPI_ISL_756655	2020-12-17	delH69V70,Y145del,N501Y,A570D,D614G,P681H,T716I,S982A,D1118H	TRUE
EPI_ISL_736195	2020-12-13	delH69V70,Y145del,N501Y,A570D,D614G,P681H,T716I,S982A,D1118H	TRUE
EPI_ISL_756603	2020-12-16	delH69V70,V143del,Y144F,N501Y,A570D,D614G,P681H,T716I,S982A,D1118H	TRUE
EPI_ISL_756664	2020-12-16	delH69V70,Y145del,N501Y,A570D,D614G,P681H,N710K,T716I,S982A,D1118H	TRUE
EPI_ISL_756662	2020-12-17	delH69V70,Y145del,N501Y,A570D,D614G,P681H,T716I,S982A,D1118H	TRUE
EPI_ISL_756665	2020-12-17	delH69V70,Y145del,N501Y,A570D,D614G,P681H,T716I,S982A,D1118H	TRUE
EPI_ISL_756650	2020-12-16	delH69V70,Y145del,N501Y,A570D,D614G,P681H,T716I,S982A,D1118H	TRUE
EPI_ISL_756666	2020-12-17	delH69V70,Y145del,N501Y,A570D,D614G,P681H,T716I,S982A,D1118H	TRUE
EPI_ISL_756667	2020-12-17	delH69V70,Y145del,N501Y,A570D,D614G,P681H,T716I,S982A,D1118H	TRUE
EPI_ISL_762446	2020-12-17	delH69V70,Y145del,N501Y,A570D,D614G,P681H,T716I,S982A,D1118H	TRUE
EPI_ISL_761173	2020-12-18	delH69V70,Y145del,N501Y,A570D,D614G,P681H,T716I,S982A,D1118H	TRUE
EPI_ISL_761149	2020-12-17	delH69V70,Y145del,N501Y,A570D,D614G,P681H,T716I,S982A,D1118H	TRUE
EPI_ISL_761136	2020-12-18	delH69V70,Y145del,N501Y,A570D,D614G,P681H,T716I,S982A,D1118H	TRUE
EPI_ISL_761151	2020-12-17	delH69V70,Y145del,N501Y,A570D,D614G,P681H,T716I,S982A,D1118H	TRUE
EPI_ISL_761159	2020-12-18	delH69V70,Y145del,N501Y,A570D,D614G,P681H,T716I,S982A,D1118H	TRUE
EPI_ISL_761155	2020-12-18	delH69V70,Y145del,N501Y,A570D,D614G,P681H,T716I,S982A,D1118H	TRUE
EPI_ISL_761130	2020-12-18	delH69V70,Y145del,N501Y,A570D,D614G,P681H,T716I,S982A,D1118H	TRUE
EPI_ISL_762448	2020-12-16	delH69V70,Y145del,N501Y,A570D,D614G,P681H,T716I,S982A,D1118H	TRUE
EPI_ISL_761161	2020-12-18	delH69V70,Y145del,N501Y,A570D,D614G,P681H,T716I,S982A,D1118H	TRUE
EPI_ISL_762447	2020-12-16	delH69V70,Y145del,N501Y,A570D,D614G,P681H,T716I,S982A,D1118H	TRUE
EPI_ISL_762455	2020-12-16	delH69V70,Y145del,N501Y,A570D,D614G,P681H,T716I,S982A,D1118H	TRUE
EPI_ISL_762461	2020-12-17	delH69V70,Y145del,N501Y,A570D,D614G,P681H,T716I,S982A,D1118H	TRUE
EPI_ISL_762456	2020-12-15	delH69V70,Y145del,N501Y,A570D,D614G,P681H,T716I,S982A,D1118H	TRUE
EPI_ISL_761171	2020-12-17	delH69V70,Y145del,N501Y,A570D,D614G,P681H,T716I,S982A,D1118H	TRUE
EPI_ISL_762454	2020-12-16	delH69V70,Y145del,N501Y,A570D,D614G,P681H,T716I,S982A,D1118H	TRUE
EPI_ISL_762453	2020-12-16	delH69V70,Y145del,N501Y,A570D,D614G,P681H,T716I,S982A,D1118H	TRUE
EPI_ISL_761160	2020-12-17	delH69V70,Y145del,N501Y,A570D,D614G,P681H,T716I,S982A,D1118H	TRUE
EPI_ISL_762451	2020-12-17	delH69V70,Y145del,N501Y,A570D,D614G,P681H,T716I,S982A,D1118H	TRUE
EPI_ISL_762463	2020-12-15	delH69V70,Y145del,N501Y,A570D,D614G,P681H,T716I,S982A,D1118H	TRUE
EPI_ISL_762465	2020-12-16	delH69V70,Y145del,N501Y,A570D,D614G,P681H,T716I,S982A,D1118H	TRUE
EPI_ISL_762466	2020-12-17	P25S,delH69V70,Y145del,N501Y,A570D,D614G,P681H,T716I,S982A,D1118H	TRUE
EPI_ISL_762462	2020-12-15	delH69V70,Y145del,N501Y,A570D,D614G,P681H,T716I,S982A,D1118H	TRUE
EPI_ISL_762457	2020-12-16	delH69V70,Y145del,N501Y,A570D,D614G,P681H,T716I,S982A,D1118H	TRUE
EPI_ISL_762467	2020-12-17	delH69V70,Y145del,N501Y,A570D,D614G,P681H,T716I,S982A,D1118H	TRUE
EPI_ISL_762472	2020-12-17	delH69V70,Y145del,N501Y,A570D,D614G,P681H,T716I,S982A,D1118H	TRUE
EPI_ISL_762458	2020-12-16	delH69V70,Y145del,N501Y,A570D,D614G,P681H,T716I,S982A,D1118H	TRUE
EPI_ISL_762470	2020-12-16	delH69V70,Y145del,N501Y,A570D,D614G,P681H,T716I,S982A,D1118H	TRUE
EPI_ISL_762471	2020-12-16	delH69V70,Y145del,N501Y,A570D,D614G,P681H,T716I,S982A,D1118H	TRUE
EPI_ISL_762459	2020-12-17	delH69V70,Y145del,N501Y,A570D,D614G,P681H,T716I,S982A,D1118H	TRUE
EPI_ISL_762474	2020-12-18	delH69V70,Y145del,N501Y,A570D,D614G,P681H,T716I,S982A,D1118H	TRUE
EPI_ISL_762473	2020-12-17	delH69V70,Y145del,N501Y,A570D,D614G,P681H,T716I,S982A,D1118H	TRUE
EPI_ISL_762460	2020-12-16	delH69V70,Y145del,N501Y,A570D,D614G,P681H,T716I,S982A,D1118H	TRUE
EPI_ISL_762479	2020-12-16	delH69V70,Y145del,N501Y,A570D,D614G,P681H,T716I,S982A,D1118H	TRUE
EPI_ISL_762475	2020-12-16	delH69V70,Y145del,N501Y,A570D,D614G,P681H,T716I,S982A,D1118H	TRUE
EPI_ISL_762478	2020-12-16	delH69V70,Y145del,N501Y,A570D,D614G,P681H,T716I,S982A,D1118H	TRUE
EPI_ISL_762484	2020-12-16	delH69V70,Y145del,N501Y,A570D,D614G,P681H,T716I,S982A,D1118H	TRUE
EPI_ISL_762480	2020-12-15	delH69V70,Y145del,N501Y,A570D,D614G,P681H,T716I,S982A,D1118H	TRUE
EPI_ISL_762476	2020-12-16	P25L,delH69V70,Y145del,N501Y,A570D,D614G,P681H,T716I,S982A,D1118H	TRUE
EPI_ISL_762481	2020-12-18	delH69V70,Y145del,N501Y,A570D,D614G,P681H,T716I,S982A,D1118H	TRUE
EPI_ISL_762483	2020-12-17	delH69V70,Y145del,N501Y,A570D,D614G,P681H,T716I,S982A,D1118H	TRUE
EPI_ISL_762496	2020-12-17	delH69V70,Y145del,N501Y,A570D,D614G,P681H,T716I,S982A,D1118H	TRUE
EPI_ISL_762477	2020-12-16	delH69V70,Y145del,N501Y,A570D,D614G,P681H,T716I,S982A,D1118H	TRUE
EPI_ISL_762490	2020-12-17	delH69V70,Y145del,N501Y,A570D,D614G,P681H,T716I,S982A,D1118H	TRUE
EPI_ISL_762488	2020-12-16	delH69V70,Y145del,N501Y,A570D,D614G,P681H,T716I,S982A,D1118H	TRUE
EPI_ISL_762493	2020-12-14	delH69V70,Y145del,N501Y,A570D,D614G,P681H,T716I,S982A,D1118H	TRUE
EPI_ISL_762494	2020-12-14	delH69V70,V143del,Y144F,N501Y,A570D,D614G,P681H,T716I,S982A,D1118H	TRUE
EPI_ISL_762498	2020-12-15	delH69V70,Y145del,N501Y,A570D,D614G,P681H,T716I,S982A,D1118H	TRUE
EPI_ISL_762492	2020-12-17	delH69V70,Y145del,N501Y,A570D,D614G,P681H,T716I,S982A,D1118H	TRUE
EPI_ISL_763790	2020-11-27	delH69V70,Y145del,N501Y,A570D,D614G,P681H,T716I,S939F,S982A,D1118H	TRUE
EPI_ISL_763791	2020-12-18	delH69V70,Y145del,N501Y,A570D,D614G,P681H,T716I,S982A,D1118H	TRUE
EPI_ISL_763799	2020-12-18	delH69V70,Y145del,N501Y,A570D,D614G,P681H,T716I,S982A,D1118H	TRUE
EPI_ISL_782934	2020-12-07	delH69V70,Y145del,N501Y,A570D,D614G,P681H,T716I,S982A,D1118H	TRUE
EPI_ISL_782932	2020-12-07	delH69V70,Y145del,A243S,N501Y,A570D,D614G,P681H,T716I,S982A,D1118H	TRUE
EPI_ISL_781606	2020-12-18	delH69V70,Y145del,N501Y,A570D,D614G,P681H,T716I,S982A,D1118H	TRUE
EPI_ISL_950908	2020-12-16	delH69V70,Y145del,N501Y,A570D,D614G,P681H,T716I,S982A,D1118H	TRUE
EPI_ISL_782937	2020-12-08	delH69V70,Y145del,N501Y,A570D,D614G,P681H,T716I,S982A,D1118H	TRUE
EPI_ISL_950911	2020-12-15	delH69V70,Y145del,N501Y,A570D,D614G,P681H,T716I,S982A,D1118H	TRUE
EPI_ISL_782930	2020-12-07	delH69V70,Y145del,N501Y,A570D,D614G,P681H,T716I,S982A,D1118H	TRUE
EPI_ISL_950904	2020-12-15	delH69V70,Y145del,N501Y,A570D,D614G,P681H,T716I,S982A,D1118H	TRUE
EPI_ISL_762495	2020-12-18	delH69V70,Y145del,N501Y,A570D,D614G,P681H,T716I,S982A,D1118H	TRUE
EPI_ISL_950912	2020-12-16	delH69V70,Y145del,N501Y,A570D,D614G,P681H,T716I,S982A,D1118H	TRUE
EPI_ISL_950914	2020-12-15	delH69V70,Y145del,N501Y,A570D,D614G,P681H,T716I,S982A,D1118H	TRUE
EPI_ISL_950910	2020-12-16	delH69V70,Y145del,N501Y,A570D,D614G,P681H,T716I,S982A,D1118H	TRUE
EPI_ISL_643939	2020-10-29	delH69V70,Y145del,N501Y,A570D,D614G,P681H,T716I,S982A,D1118H	TRUE
EPI_ISL_655913	2020-11-08	delH69V70,Y145del,N501Y,A570D,D614G,V615L,P681H,T716I,S982A,D1118H	TRUE
EPI_ISL_950918	2020-12-16	delH69V70,Y145del,N501Y,A570D,D614G,P681H,T716I,S982A,D1118H	TRUE
EPI_ISL_782936	2020-12-06	delH69V70,Y145del,N501Y,A570D,D614G,P681H,T716I,S982A,D1118H	TRUE
EPI_ISL_762485	2020-12-16	delH69V70,Y145del,N501Y,A570D,D614G,P681H,T716I,S982A,D1118H	TRUE
EPI_ISL_659491	2020-11-05	delH69V70,Y145del,N501Y,A570D,D614G,P681H,T716I,S982A,D1118H	TRUE
EPI_ISL_655866	2020-11-08	delH69V70,Y145del,N501Y,A570D,D614G,P681H,T716I,S982A,D1118H	TRUE
EPI_ISL_667845	2020-11-12	delH69V70,Y145del,N501Y,A570D,D614G,P681H,T716I,S982A,D1118H	TRUE
EPI_ISL_667914	2020-11-13	delH69V70,Y145del,N501Y,A570D,D614G,P681H,T716I,S982A,D1118H	TRUE
EPI_ISL_667916	2020-11-13	delH69V70,Y145del,N501Y,A570D,D614G,P681H,T716I,S982A,D1118H	TRUE
EPI_ISL_667850	2020-11-14	delH69V70,Y145del,N501Y,A570D,D614G,P681H,T716I,S982A,D1118H	TRUE
EPI_ISL_658188	2020-11-08	delH69V70,Y145del,N501Y,A570D,D614G,P681H,T716I,S982A,D1118H	TRUE
EPI_ISL_667899	2020-11-12	delH69V70,Y145del,N501Y,A570D,D614G,P681H,T716I,S982A,D1118H	TRUE
EPI_ISL_667882	2020-11-13	delH69V70,Y145del,N501Y,A570D,D614G,P681H,T716I,S982A,D1118H	TRUE
EPI_ISL_673792	2020-11-15	delH69V70,Y145del,N501Y,A570D,A575S,D614G,P681H,A706V,T716I,S982A,D1118H	TRUE
EPI_ISL_667903	2020-11-12	delH69V70,Y145del,N501Y,A570D,D614G,P681H,T716I,S982A,D1118H	TRUE
EPI_ISL_667846	2020-11-12	delH69V70,Y145del,N501Y,A570D,D614G,P681H,T716I,S982A,D1118H	TRUE
EPI_ISL_673786	2020-11-15	delH69V70,Y145del,N501Y,A570D,D614G,P681H,A706V,T716I,S982A,D1118H	TRUE
EPI_ISL_667892	2020-11-12	delH69V70,Y145del,N501Y,A570D,D614G,P681H,T716I,S982A,D1118H	TRUE
EPI_ISL_679862	2020-11-06	delH69V70,Y145del,N501Y,A570D,D614G,P681H,T716I,S982A,D1118H	TRUE
EPI_ISL_673799	2020-11-15	delH69V70,Y145del,H146Q,N501Y,A570D,D614G,P681H,T716I,S982A,D1118H	TRUE
EPI_ISL_673794	2020-11-15	delH69V70,Y145del,N501Y,A570D,D614G,P681H,T716I,S982A,D1118H	TRUE
EPI_ISL_673793	2020-11-15	delH69V70,Y145del,N501Y,A570D,D614G,P681H,T716I,S982A,D1118H	TRUE
EPI_ISL_673797	2020-11-13	delH69V70,Y145del,N501Y,A570D,D614G,P681H,T716I,S982A,D1118H	TRUE
EPI_ISL_679883	2020-11-06	delH69V70,Y145del,N501Y,A570D,D614G,P681H,T716I,S982A,D1118H	TRUE
EPI_ISL_702824	2020-12-03	delH69V70,N501Y,A570D,D614G,P681H,T716I,S982A,D1118H	TRUE
EPI_ISL_679884	2020-11-06	delH69V70,Y145del,N501Y,A570D,D614G,P681H,T716I,S982A,D1118H	TRUE
EPI_ISL_702829	2020-11-22	delH69V70,Y145del,N501Y,A570D,D614G,P681H,T716I,S982A,D1118H	TRUE
EPI_ISL_702816	2020-11-19	delH69V70,Y145del,N501Y,A570D,D614G,P681H,T716I,S982A,D1118H	TRUE
EPI_ISL_679841	2020-10-31	delH69V70,Y145del,N501Y,A570D,D614G,P681H,T716I,S982A,D1118H	TRUE
EPI_ISL_705044	2020-11-22	delH69V70,Y145del,N501Y,A570D,D614G,P681H,T716I,S982A,D1118H	TRUE
EPI_ISL_702830	2020-11-22	delH69V70,Y145del,N501Y,A570D,D614G,P681H,T716I,S982A,D1118H	TRUE
EPI_ISL_702804	2020-11-19	delH69V70,Y145del,N501Y,A570D,D614G,P681H,T716I,S982A,D1118H	TRUE
EPI_ISL_705057	2020-11-22	delH69V70,Y145del,N501Y,A570D,D614G,P681H,T716I,S982A,D1118H	TRUE
EPI_ISL_702833	2020-11-22	delH69V70,Y145del,N501Y,A570D,D614G,P681H,T716I,S982A,D1118H	TRUE
EPI_ISL_718355	2020-12-10	delH69V70,Y145del,N501Y,A570D,D614G,P681H,T716I,S982A,D1118H	TRUE
EPI_ISL_718363	2020-12-10	delH69V70,Y145del,N501Y,A570D,D614G,P681H,T716I,S982A,D1118H	TRUE
EPI_ISL_718359	2020-12-10	delH69V70,Y145del,N501Y,A570D,D614G,P681H,T716I,S982A,D1118H	TRUE
EPI_ISL_718350	2020-12-10	delH69V70,Y145del,N501Y,A570D,D614G,P681H,T716I,S982A,D1118H	TRUE
EPI_ISL_718362	2020-12-10	delH69V70,Y145del,N501Y,A570D,D614G,P681H,T716I,S982A,D1118H	TRUE
EPI_ISL_705055	2020-11-22	delH69V70,Y145del,N501Y,A570D,D614G,P681H,T716I,S982A,D1118H	TRUE
EPI_ISL_718354	2020-12-10	delH69V70,Y145del,N501Y,A570D,D614G,P681H,T716I,S982A,D1118H	TRUE
EPI_ISL_718353	2020-12-10	delH69V70,Y145del,N501Y,A570D,D614G,P681H,A706V,T716I,S982A,D1118H	TRUE
EPI_ISL_718366	2020-12-10	delH69V70,Y145del,N501Y,A570D,D614G,P681H,T716I,S982A,D1118H	TRUE
EPI_ISL_718369	2020-12-10	delH69V70,Y145del,N501Y,A570D,D614G,P681H,T716I,S982A,D1118H	TRUE
EPI_ISL_705082	2020-11-22	delH69V70,Y145del,N501Y,A570D,D614G,P681H,T716I,S982A,D1118H	TRUE
EPI_ISL_718383	2020-12-10	delH69V70,Y145del,N501Y,A570D,D614G,P681H,T716I,S982A,D1118H	TRUE
EPI_ISL_720670	2020-12-02	delH69V70,Y145del,N501Y,A570D,D614G,P681H,T716I,S982A,D1118H	TRUE
EPI_ISL_718356	2020-12-10	delH69V70,Y145del,N501Y,A570D,D614G,P681H,T716I,S982A,D1118H	TRUE
EPI_ISL_718364	2020-12-10	delH69V70,Y145del,N501Y,A570D,D614G,P681H,T716I,S982A,D1118H	TRUE
EPI_ISL_718398	2020-12-10	delH69V70,Y145del,N501Y,A570D,D614G,P681H,T716I,S982A,D1118H	TRUE
EPI_ISL_718391	2020-12-10	delH69V70,Y145del,N501Y,A570D,D614G,P681H,T716I,S982A,D1118H	TRUE
EPI_ISL_718381	2020-12-10	delH69V70,Y145del,N501Y,A570D,D614G,P681H,T716I,S982A,D1118H	TRUE
EPI_ISL_718380	2020-12-10	delH69V70,Y145del,N501Y,A570D,D614G,P681H,T716I,S982A,D1118H	TRUE
EPI_ISL_718384	2020-12-10	delH69V70,Y145del,N501Y,A570D,D614G,P681H,T716I,S982A,D1118H	TRUE
EPI_ISL_718392	2020-12-10	delH69V70,Y145del,N501Y,A570D,D614G,P681H,T716I,S982A,D1118H	TRUE
EPI_ISL_720676	2020-12-02	delH69V70,Y145del,N501Y,A570D,D614G,P681H,T716I,S982A,D1118H	TRUE
EPI_ISL_718395	2020-12-10	delH69V70,Y145del,N501Y,A570D,D614G,P681H,T716I,S982A,D1118H	TRUE
EPI_ISL_718396	2020-12-10	delH69V70,Y145del,N501Y,A570D,D614G,P681H,T716I,I818V,S982A,D1118H	TRUE
EPI_ISL_718394	2020-12-10	delH69V70,Y145del,N501Y,A570D,D614G,P681H,T716I,S982A,D1118H	TRUE
EPI_ISL_720674	2020-12-03	delH69V70,Y145del,N501Y,A570D,D614G,P681H,T716I,S982A,D1118H	TRUE
EPI_ISL_720675	2020-12-02	delH69V70,Y145del,N501Y,A570D,D614G,P681H,T716I,S982A,D1118H	TRUE
EPI_ISL_720669	2020-12-02	delH69V70,Y145del,N501Y,A570D,D614G,P681H,T716I,S982A,A1020V,D1118H	TRUE
EPI_ISL_718399	2020-12-10	delH69V70,Y145del,N501Y,A570D,D614G,P681H,T716I,S982A,D1118H	TRUE
EPI_ISL_720685	2020-12-04	delH69V70,Y145del,N501Y,A570D,D614G,P681H,T716I,S982A,D1118H	TRUE
EPI_ISL_720678	2020-12-03	delH69V70,Y145del,N501Y,A570D,D614G,P681H,T716I,S982A,D1118H	TRUE
EPI_ISL_731316	2020-12-09	delH69V70,Y145del,N501Y,A570D,D614G,P681H,T716I,S982A,D1118H	TRUE
EPI_ISL_720682	2020-12-02	delH69V70,Y145del,N501Y,A570D,D614G,P681H,T716I,S982A,D1118H	TRUE
EPI_ISL_731330	2020-12-11	delH69V70,Y145del,N501Y,A570D,D614G,P681H,T716I,S982A,D1118H	TRUE
EPI_ISL_731366	2020-12-09	delH69V70,Y145del,N501Y,A570D,D614G,P681H,T716I,S982A,D1118H	TRUE
EPI_ISL_720677	2020-12-02	delH69V70,Y145del,N501Y,A570D,D614G,P681H,T716I,S982A,D1118H	TRUE
EPI_ISL_720684	2020-12-04	delH69V70,Y145del,N501Y,A570D,D614G,P681H,T716I,S982A,D1118H	TRUE
EPI_ISL_720686	2020-12-04	delH69V70,Y145del,N501Y,A570D,D614G,P681H,T716I,S982A,D1118H	TRUE
EPI_ISL_731315	2020-12-09	delH69V70,Y145del,N501Y,A570D,D614G,P681H,T716I,S982A,D1118H	TRUE
EPI_ISL_731327	2020-12-10	delH69V70,Y145del,N501Y,A570D,D614G,P681H,T716I,S982A,D1118H	TRUE
EPI_ISL_720680	2020-12-02	delH69V70,E96D,Y145del,N501Y,A570D,D614G,P681H,T716I,S982A,D1118H	TRUE
EPI_ISL_731331	2020-12-09	delH69V70,Y145del,N501Y,A570D,D614G,P681H,T716I,S982A,D1118H	TRUE
EPI_ISL_731320	2020-12-10	delH69V70,Y145del,N501Y,A570D,D614G,P681H,T716I,S982A,D1118H	TRUE
EPI_ISL_731373	2020-12-10	delH69V70,Y145del,N501Y,A570D,D614G,P681H,T716I,S982A,D1118H	TRUE
EPI_ISL_731332	2020-12-11	delH69V70,Y145del,N501Y,A570D,D614G,P681H,T716I,S982A,D1118H	TRUE
EPI_ISL_731317	2020-12-09	delH69V70,Y145del,N501Y,A570D,D614G,P681H,T716I,S982A,D1118H	TRUE
EPI_ISL_731361	2020-12-11	delH69V70,Y145del,N501Y,A570D,D614G,P681H,T716I,S982A,D1118H	TRUE
EPI_ISL_731395	2020-12-08	delH69V70,Y145del,N501Y,A570D,D614G,P681H,T716I,S982A,D1118H	TRUE
EPI_ISL_731362	2020-12-09	delH69V70,Y145del,N501Y,A570D,D614G,P681H,T716I,S982A,D1118H	TRUE
EPI_ISL_731324	2020-12-09	delH69V70,Y145del,N501Y,A570D,D614G,P681H,T716I,S982A,D1118H	TRUE
EPI_ISL_731376	2020-12-10	delH69V70,Y145del,N501Y,A570D,D614G,P681H,T716I,S982A,D1118H	TRUE
EPI_ISL_731374	2020-12-09	delH69V70,Y145del,N501Y,A570D,D614G,P681H,T716I,S982A,D1118H	TRUE
EPI_ISL_733977	2020-12-11	delH69V70,Y145del,N501Y,A570D,D614G,P681H,T716I,S982A,D1118H	TRUE
EPI_ISL_731397	2020-12-10	delH69V70,Y145del,N501Y,A570D,D614G,P681H,T716I,S982A,D1118H	TRUE
EPI_ISL_731377	2020-12-08	delH69V70,Y145del,N501Y,A570D,D614G,P681H,T716I,S982A,D1118H	TRUE
EPI_ISL_736205	2020-12-10	delH69V70,Y145del,N501Y,A570D,D614G,P681H,T716I,S982A,D1118H	TRUE
EPI_ISL_731396	2020-12-09	delH69V70,Y145del,N501Y,A570D,D614G,P681H,T716I,S982A,D1118H	TRUE
EPI_ISL_736200	2020-12-13	delH69V70,Y145del,N501Y,A570D,D614G,P681H,T716I,S982A,D1118H	TRUE
EPI_ISL_731387	2020-12-09	delH69V70,Y145del,N501Y,A570D,D614G,P681H,T716I,S982A,D1118H	TRUE
EPI_ISL_733994	2020-12-11	delH69V70,Y145del,N501Y,A570D,D614G,P681H,T716I,S982A,D1118H	TRUE
EPI_ISL_733982	2020-12-11	delH69V70,Y145del,N501Y,A570D,D614G,P681H,T716I,S982A,D1118H	TRUE
EPI_ISL_736201	2020-12-11	delH69V70,Y145del,N501Y,A570D,D614G,P681H,T716I,S982A,D1118H	TRUE
EPI_ISL_736208	2020-12-12	delH69V70,Y145del,A262V,N501Y,A570D,D614G,P681H,T716I,S982A,D1118H	TRUE
EPI_ISL_736202	2020-12-08	delH69V70,Y145del,N501Y,A570D,D614G,P681H,T716I,S982A,D1118H	TRUE
EPI_ISL_736207	2020-12-12	delH69V70,Y145del,N501Y,A570D,D614G,P681H,T716I,S982A,D1118H	TRUE
EPI_ISL_756604	2020-12-17	delH69V70,Y145del,S221L,N501Y,A570D,D614G,P681H,T716I,S982A,D1118H	TRUE
EPI_ISL_742035	2020-12-06	delH69V70,Y145del,N501Y,A570D,D614G,P681H,T716I,S982A,D1118H	TRUE
EPI_ISL_756614	2020-12-17	delH69V70,Y145del,N501Y,A570D,D614G,P681H,T716I,S982A,D1118H	TRUE
EPI_ISL_736203	2020-12-11	delH69V70,E96D,Y145del,N501Y,A570D,D614G,P681H,T716I,S982A,D1118H	TRUE
EPI_ISL_742015	2020-12-18	delH69V70,Y145del,N501Y,A570D,D614G,P681H,T716I,S982A,D1118H	TRUE
EPI_ISL_742034	2020-12-17	delH69V70,Y145del,N501Y,A570D,D614G,P681H,T716I,S982A,D1118H	TRUE
EPI_ISL_756606	2020-12-17	delH69V70,Y145del,N501Y,A570D,D614G,P681H,T716I,S982A,D1118H	TRUE
EPI_ISL_742086	2020-12-18	delH69V70,Y145del,N501Y,A570D,D614G,P681H,T716I,S982A,D1118H	TRUE
EPI_ISL_756607	2020-12-17	delH69V70,Y145del,N501Y,A570D,D614G,P681H,T716I,S982A,D1118H	TRUE
EPI_ISL_756627	2020-12-17	delH69V70,Y145del,N501Y,A570D,D614G,P681H,T716I,S982A,D1118H	TRUE
EPI_ISL_756611	2020-12-17	delH69V70,Y145del,N501Y,A570D,D614G,P681H,T716I,S982A,D1118H	TRUE
EPI_ISL_756626	2020-12-16	delH69V70,Y145del,N501Y,A570D,D614G,P681H,T716I,S982A,D1118H	TRUE
EPI_ISL_756610	2020-12-17	delH69V70,Y145del,N501Y,A570D,D614G,P681H,T716I,S982A,D1118H	TRUE
EPI_ISL_756615	2020-12-17	delH69V70,Y145del,N501Y,A570D,D614G,P681H,T716I,S982A,D1118H	TRUE
EPI_ISL_756613	2020-12-17	delH69V70,Y145del,N501Y,A570D,D614G,P681H,T716I,S982A,D1118H	TRUE
EPI_ISL_756624	2020-12-16	delH69V70,Y145del,N501Y,A570D,D614G,P681H,T716I,S982A,D1118H	TRUE
EPI_ISL_756633	2020-12-17	delH69V70,Y145del,N501Y,A570D,T572I,D614G,P681H,T716I,S982A,D1118H	TRUE
EPI_ISL_756618	2020-12-16	V6A,delH69V70,Y145del,N501Y,A570D,D614G,P681H,T716I,S982A,D1118H	TRUE
EPI_ISL_756629	2020-12-17	delH69V70,Y145del,N501Y,A570D,D614G,P681H,T716I,S982A,D1118H	TRUE
EPI_ISL_756608	2020-12-17	delH69V70,Y145del,N501Y,A570D,D614G,P681H,T716I,S982A,D1118H	TRUE
EPI_ISL_756625	2020-12-17	delH69V70,Y145del,S221L,N501Y,A570D,D614G,P681H,T716I,S982A,D1118H	TRUE
EPI_ISL_756622	2020-12-17	delH69V70,Y145del,N501Y,A570D,D614G,P681H,T716I,S982A,D1118H	TRUE
EPI_ISL_756623	2020-12-17	delH69V70,Y145del,N501Y,A570D,D614G,P681H,T716I,S982A,D1118H	TRUE
EPI_ISL_756617	2020-12-17	delH69V70,S98F,Y145del,N501Y,A570D,D614G,P681H,T716I,S982A,D1118H	TRUE
EPI_ISL_756638	2020-12-16	delH69V70,Y145del,N501Y,A570D,D614G,P681H,T716I,S982A,D1118H	TRUE
EPI_ISL_756637	2020-12-17	delH69V70,Y145del,N501Y,A570D,D614G,P681H,T716I,S982A,D1118H	TRUE
EPI_ISL_756630	2020-12-17	delH69V70,Y145del,N501Y,A570D,D614G,P681H,T716I,S982A,D1118H	TRUE
EPI_ISL_756634	2020-12-16	delH69V70,Y145del,N501Y,A570D,D614G,P681H,T716I,S982A,D1118H	TRUE
EPI_ISL_756631	2020-12-17	delH69V70,Y145del,N501Y,A570D,D614G,P681H,T716I,S982A,D1118H	TRUE
EPI_ISL_756635	2020-12-16	delH69V70,Y145del,N501Y,A570D,D614G,P681H,T716I,S982A,D1118H	TRUE
EPI_ISL_756646	2020-12-16	delH69V70,Y145del,L216F,N501Y,A570D,D614G,P681H,T716I,S982A,D1118H	TRUE
EPI_ISL_756643	2020-12-17	delH69V70,Y145del,N501Y,A570D,D614G,P681H,T716I,S982A,D1118H	TRUE
EPI_ISL_756641	2020-12-16	delH69V70,Y145del,N501Y,A570D,D614G,P681H,T716I,S982A,D1118H	TRUE
EPI_ISL_756661	2020-12-17	delH69V70,Y145del,N501Y,A570D,D614G,P681H,T716I,S982A,D1118H	TRUE
EPI_ISL_756642	2020-12-17	delH69V70,Y145del,N501Y,A570D,D614G,P681H,T716I,S982A,D1118H	TRUE
EPI_ISL_756670	2020-12-16	delH69V70,Y145del,N501Y,A570D,D614G,P681H,T716I,S982A,D1118H	TRUE
EPI_ISL_756644	2020-12-16	delH69V70,Y145del,N501Y,A570D,D614G,P681H,T716I,S982A,D1118H	TRUE
EPI_ISL_756645	2020-12-16	delH69V70,Y145del,N501Y,A570D,D614G,P681H,T716I,S982A,D1118H	TRUE
EPI_ISL_756636	2020-12-16	delH69V70,Y145del,N501Y,A570D,D614G,P681H,T716I,S982A,D1118H	TRUE
EPI_ISL_756669	2020-12-16	delH69V70,Y145del,N501Y,A570D,D614G,P681H,T716I,S982A,D1118H	TRUE
EPI_ISL_756673	2020-12-16	delH69V70,Y145del,N501Y,A570D,D614G,P681H,T716I,S982A,D1118H	TRUE
EPI_ISL_756671	2020-12-17	delH69V70,Y145del,N501Y,A570D,D614G,A647S,P681H,T716I,S982A,D1118H	TRUE
EPI_ISL_756660	2020-12-17	delH69V70,Y145del,N501Y,A570D,D614G,P681H,T716I,S982A,D1118H	TRUE
EPI_ISL_756672	2020-12-17	delH69V70,Y145del,N501Y,A570D,D614G,P681H,T716I,S982A,D1118H	TRUE
EPI_ISL_756678	2020-12-17	delH69V70,Y145del,N501Y,A570D,D614G,P681H,T716I,S982A,D1118H	TRUE
EPI_ISL_756681	2020-12-16	delH69V70,Y145del,N501Y,A570D,D614G,P681H,T716I,S982A,D1118H	TRUE
EPI_ISL_756683	2020-12-16	delH69V70,Y145del,N501Y,A570D,D614G,P681H,T716I,S982A,D1118H	TRUE
EPI_ISL_756679	2020-12-17	delH69V70,Y145del,N501Y,A570D,D614G,P681H,T716I,S982A,D1118H	TRUE
EPI_ISL_756668	2020-12-17	delH69V70,Y145del,N501Y,A570D,D614G,P681H,T716I,S982A,D1118H	TRUE
EPI_ISL_756689	2020-12-15	delH69V70,Y145del,N501Y,A570D,D614G,P681H,T716I,S982A,D1118H	TRUE
EPI_ISL_756682	2020-12-16	delH69V70,V143del,Y144F,N501Y,A570D,D614G,P681H,T716I,S982A,D1118H	TRUE
EPI_ISL_756688	2020-12-16	delH69V70,Y145del,N501Y,A570D,D614G,P681H,T716I,S982A,D1118H	TRUE
EPI_ISL_756687	2020-12-16	delH69V70,Y145del,N501Y,A570D,D614G,P681H,T716I,S982A,D1118H	TRUE
EPI_ISL_756695	2020-12-16	delH69V70,Y145del,N501Y,A570D,D614G,P681H,T716I,S982A,D1118H	TRUE
EPI_ISL_756691	2020-12-15	delH69V70,Y145del,N501Y,A570D,D614G,P681H,T716I,S982A,D1118H	TRUE
EPI_ISL_756684	2020-12-17	delH69V70,Y145del,N501Y,A570D,D614G,P681H,T716I,S982A,D1118H	TRUE
EPI_ISL_756696	2020-12-16	delH69V70,S98F,Y145del,N501Y,A570D,D614G,P681H,T716I,S982A,D1118H	TRUE
EPI_ISL_756697	2020-12-15	delH69V70,Y145del,N501Y,A570D,D614G,P681H,T716I,S982A,D1118H	TRUE
EPI_ISL_756676	2020-12-17	delH69V70,Y145del,N501Y,A570D,D614G,P681H,T716I,S982A,D1118H	TRUE
EPI_ISL_763809	2020-12-16	delH69V70,Y145del,N501Y,A570D,D614G,P681H,T716I,S982A,D1118H	TRUE
EPI_ISL_756699	2020-12-15	delH69V70,Y145del,N501Y,A570D,D614G,P681H,T716I,S982A,D1118H	TRUE
EPI_ISL_756698	2020-12-15	delH69V70,Y145del,N501Y,A570D,D614G,P681H,T716I,S982A,D1118H	TRUE
EPI_ISL_766062	2020-12-18	delH69V70,N501Y,A570D,D614G,P681H,T716I,S982A,D1118H	TRUE
EPI_ISL_766075	2020-12-16	delH69V70,N501Y,A570D,D614G,P681H,T716I,S982A,D1118H	TRUE
EPI_ISL_763801	2020-12-03	delH69V70,Y145del,N501Y,A570D,D614G,P681H,T716I,S939F,S982A,D1118H	TRUE
EPI_ISL_763804	2020-12-18	delH69V70,Y145del,N501Y,A570D,D614G,P681H,T716I,S982A,D1118H	TRUE
EPI_ISL_766082	2020-12-18	delH69V70,Y145del,N501Y,A570D,D614G,P681H,T716I,S982A,D1118H	TRUE
EPI_ISL_778038	2020-12-18	delH69V70,Y145del,N501Y,A570D,D614G,P681H,T716I,S982A,D1118H	TRUE
EPI_ISL_778002	2020-12-18	delH69V70,Y145del,N501Y,A570D,D614G,P681H,T716I,S982A,D1118H	TRUE
EPI_ISL_766089	2020-12-16	delH69V70,Y145del,N501Y,A570D,D614G,P681H,T716I,S982A,D1118H	TRUE
EPI_ISL_778056	2020-12-18	delH69V70,Y145del,N501Y,A570D,D614G,P681H,T716I,S982A,D1118H	TRUE
EPI_ISL_778041	2020-12-18	delH69V70,Y145del,N501Y,A570D,D614G,P681H,T716I,R765C,S982A,D1118H	TRUE
EPI_ISL_778001	2020-12-18	delH69V70,Y145del,N501Y,A570D,D614G,P681H,T716I,S982A,D1118H	TRUE
EPI_ISL_778067	2020-12-18	delH69V70,Y145del,N501Y,A570D,D614G,P681H,T716I,S982A,D1118H	TRUE
EPI_ISL_778051	2020-12-18	delH69V70,S98F,D111N,Y145del,N501Y,A570D,D614G,P681H,T716I,S982A,D1118H	TRUE
EPI_ISL_778039	2020-12-18	delH69V70,Y145del,N501Y,A570D,D614G,P681H,T716I,S982A,D1118H	TRUE
EPI_ISL_781645	2020-12-18	delH69V70,Y145del,N501Y,A570D,D614G,P681H,T716I,S982A,D1118H	TRUE
EPI_ISL_781690	2020-12-14	delH69V70,Y145del,N501Y,A570D,D614G,P681H,T716I,S939F,S982A,D1118H	TRUE
EPI_ISL_781610	2020-12-18	delH69V70,Y145del,N501Y,A570D,D614G,P681H,T716I,S982A,D1118H	TRUE
EPI_ISL_778057	2020-12-18	delH69V70,Y145del,N501Y,A570D,D614G,P681H,T716I,S982A,D1118H	TRUE
EPI_ISL_781637	2020-12-18	delH69V70,Y145del,N501Y,A570D,D614G,P681H,T716I,S982A,D1118H	TRUE
EPI_ISL_781685	2020-12-18	T20I,delH69V70,Y145del,N501Y,A570D,D614G,P681H,T716I,S982A,D1118H	TRUE
EPI_ISL_781622	2020-12-18	delH69V70,Y145del,N501Y,A570D,D614G,P681H,T716I,S982A,D1118H	TRUE
EPI_ISL_782905	2020-12-06	delH69V70,Y145del,N501Y,A570D,D614G,P681H,T716I,S982A,D1118H	TRUE
EPI_ISL_781638	2020-12-18	delH69V70,Y145del,N501Y,A570D,D614G,P681H,T716I,S982A,D1118H	TRUE
EPI_ISL_781691	2020-12-18	delH69V70,Y145del,N501Y,A570D,D614G,P681H,T716I,S982A,D1118H	TRUE
EPI_ISL_782910	2020-12-07	delH69V70,Y145del,N501Y,A570D,D614G,P681H,T716I,S982A,D1118H	TRUE
EPI_ISL_782917	2020-12-07	delH69V70,Y145del,N501Y,A570D,D614G,P681H,T716I,S982A,D1118H	TRUE
EPI_ISL_782908	2020-12-07	delH69V70,Y145del,H146Q,N501Y,A570D,D614G,P681H,T716I,S982A,D1118H	TRUE
EPI_ISL_782922	2020-12-07	delH69V70,Y145del,N501Y,A570D,D614G,P681H,T716I,S982A,D1118H	TRUE
EPI_ISL_782924	2020-12-06	delH69V70,Y145del,N501Y,A570D,D614G,P681H,T716I,S982A,D1118H	TRUE
EPI_ISL_782916	2020-12-07	delH69V70,Y145del,N501Y,A570D,D614G,P681H,T716I,S982A,D1118H	TRUE
EPI_ISL_781642	2020-12-18	delH69V70,Y145del,N501Y,A570D,D614G,P681H,T716I,S982A,D1118H	TRUE
EPI_ISL_782904	2020-12-06	delH69V70,Y145del,N501Y,A570D,D614G,P681H,T716I,S982A,D1118H	TRUE
EPI_ISL_782942	2020-12-07	delH69V70,Y145del,N501Y,A570D,D614G,P681H,T716I,S982A,D1118H	TRUE
EPI_ISL_782941	2020-12-08	delH69V70,Y145del,N501Y,A570D,D614G,P681H,I712V,T716I,S982A,D1118H	TRUE
EPI_ISL_782928	2020-12-07	delH69V70,Y145del,N501Y,A570D,D614G,P681H,T716I,S982A,D1118H	TRUE
EPI_ISL_781698	2020-12-18	delH69V70,Y145del,N501Y,A570D,D614G,P681H,T716I,S982A,D1118H	TRUE
EPI_ISL_782944	2020-12-07	delH69V70,Y145del,N501Y,A570D,D614G,P681H,T716I,S982A,D1118H	TRUE
EPI_ISL_782906	2020-12-07	L5F,delH69V70,Y145del,N501Y,A570D,D614G,P681H,T716I,S982A,D1118H	TRUE
EPI_ISL_782909	2020-12-07	delH69V70,Y145del,N501Y,A570D,D614G,P681H,T716I,S982A,D1118H	TRUE
EPI_ISL_782926	2020-12-06	delH69V70,Y145del,N501Y,A570D,D614G,P681H,T716I,S982A,D1118H	TRUE
EPI_ISL_782915	2020-12-07	delH69V70,Y145del,N501Y,A570D,D614G,P681H,T716I,S982A,D1118H	TRUE
EPI_ISL_782946	2020-12-06	delH69V70,Y145del,N501Y,A570D,D614G,P681H,T716I,S982A,D1118H	TRUE
EPI_ISL_782943	2020-12-07	delH69V70,Y145del,N501Y,A570D,D614G,P681H,T716I,S982A,D1118H	TRUE
EPI_ISL_782955	2020-12-07	delH69V70,Y145del,N501Y,A570D,D614G,P681H,T716I,S982A,D1118H	TRUE
EPI_ISL_782947	2020-12-07	delH69V70,Y145del,N501Y,A570D,D614G,P681H,T716I,S982A,D1118H	TRUE
EPI_ISL_782960	2020-12-07	delH69V70,Y145del,N501Y,A570D,D614G,P681H,T716I,S982A,D1118H	TRUE
EPI_ISL_782966	2020-12-07	delH69V70,Y145del,L455F,N501Y,L552F,A570D,D614G,P681H,T716I,S982A,D1118H	TRUE
EPI_ISL_782949	2020-12-07	delH69V70,Y145del,N501Y,A570D,D614G,P681H,T716I,S982A,D1118H	TRUE
EPI_ISL_782953	2020-12-07	delH69V70,Y145del,N501Y,A570D,D614G,P681H,T716I,S982A,D1118H	TRUE
EPI_ISL_782961	2020-12-07	delH69V70,Y145del,N501Y,A570D,D614G,P681H,T716I,S982A,D1118H	TRUE
EPI_ISL_782957	2020-12-07	delH69V70,Y145del,N501Y,A570D,D614G,P681H,T716I,S982A,D1118H	TRUE
EPI_ISL_782965	2020-12-07	delH69V70,Y145del,N501Y,A570D,D614G,P681H,T716I,S982A,D1118H	TRUE
EPI_ISL_782971	2020-12-07	delH69V70,Y145del,N501Y,A570D,D614G,P681H,T716I,S982A,D1118H	TRUE
EPI_ISL_782981	2020-12-07	delH69V70,Y145del,N501Y,A570D,D614G,P681H,T716I,S982A,D1118H	TRUE
EPI_ISL_782970	2020-12-05	delH69V70,Y145del,N501Y,A570D,D614G,P681H,T716I,S982A,D1118H	TRUE
EPI_ISL_816861	2020-12-08	delH69V70,Y145del,N501Y,A570D,D614G,P681H,T716I,S982A,D1118H	TRUE
EPI_ISL_782972	2020-12-07	delH69V70,Y145del,N501Y,A570D,D614G,P681H,T716I,S982A,D1118H	TRUE
EPI_ISL_816862	2020-12-08	delH69V70,Y145del,N501Y,A570D,D614G,P681H,T716I,S982A,D1118H	TRUE
EPI_ISL_782979	2020-12-07	delH69V70,Y145del,N501Y,A570D,D614G,P681H,T716I,S982A,D1118H	TRUE
EPI_ISL_782954	2020-12-07	delH69V70,Y145del,N501Y,A570D,D614G,P681H,T716I,S982A,D1118H	TRUE
EPI_ISL_782974	2020-12-07	delH69V70,Y145del,N501Y,A570D,D614G,P681H,T716I,S982A,D1118H	TRUE
EPI_ISL_782980	2020-12-07	delH69V70,Y145del,N501Y,A570D,D614G,P681H,T716I,S982A,D1118H	TRUE
EPI_ISL_839445	2020-11-06	delH69V70,Y145del,N501Y,A570D,D614G,P681H,T716I,S982A,D1118H	TRUE
EPI_ISL_841759	2020-12-18	delH69V70,Y145del,N501Y,A570D,D614G,P681H,T716I,S982A,D1118H	TRUE
EPI_ISL_841809	2020-12-16	delH69V70,Y145del,N501Y,A570D,D614G,P681H,T716I,S982A,D1118H	TRUE
EPI_ISL_816871	2020-12-08	delH69V70,Y145del,N501Y,A570D,D614G,P681H,T716I,S982A,D1118H	TRUE
EPI_ISL_816877	2020-12-05	delH69V70,Y145del,N501Y,A570D,D614G,P681H,T716I,S982A,D1118H	TRUE
EPI_ISL_841806	2020-12-16	delH69V70,Y145del,N501Y,A570D,D614G,P681H,T716I,S982A,D1118H	TRUE
EPI_ISL_816874	2020-12-08	delH69V70,Y145del,N501Y,A570D,D614G,P681H,T716I,S982A,D1118H	TRUE
EPI_ISL_816867	2020-12-08	delH69V70,Y145del,N501Y,A570D,D614G,P681H,T716I,S982A,D1118H	TRUE
EPI_ISL_841819	2020-12-15	delH69V70,Y145del,N501Y,A570D,D614G,P681H,T716I,S982A,D1118H	TRUE
EPI_ISL_816872	2020-12-08	delH69V70,E96D,Y145del,N501Y,A570D,D614G,P681H,T716I,S982A,D1118H	TRUE
EPI_ISL_841802	2020-12-16	delH69V70,Y145del,N501Y,A570D,D614G,P681H,T716I,S982A,D1118H	TRUE
EPI_ISL_841800	2020-12-16	delH69V70,Y145del,N501Y,A570D,D614G,P681H,T716I,S982A,K1073M,D1118H	TRUE
EPI_ISL_841804	2020-12-16	delH69V70,Y145del,N501Y,A570D,D614G,P681H,T716I,S982A,D1118H	TRUE
EPI_ISL_816863	2020-12-08	delH69V70,Y145del,N501Y,A570D,D614G,P681H,T716I,S982A,D1118H	TRUE
EPI_ISL_841810	2020-12-17	delH69V70,Y145del,N501Y,A570D,D614G,P681H,T716I,S982A,D1118H	TRUE
EPI_ISL_841815	2020-12-15	delH69V70,Y145del,N501Y,A570D,D614G,P681H,T716I,S982A,D1118H	TRUE
EPI_ISL_865727	2020-12-18	delH69V70,Y145del,N501Y,A570D,D614G,P681H,T716I,S982A,D1118H	TRUE
EPI_ISL_865724	2020-12-18	delH69V70,Y145del,N501Y,A570D,D614G,P681H,T716I,S982A,D1118H	TRUE
EPI_ISL_865726	2020-12-18	delH69V70,Y145del,N501Y,A570D,D614G,P681H,T716I,S982A,D1118H	TRUE
EPI_ISL_841801	2020-12-16	delH69V70,Y145del,N501Y,A570D,D614G,P681H,T716I,S982A,D1118H	TRUE
EPI_ISL_882333	2020-12-02	delH69V70,Y145del,N501Y,A570D,D614G,P681H,T716I,S982A,D1118H	TRUE
EPI_ISL_865728	2020-12-18	delH69V70,Y145del,N501Y,A570D,D614G,P681H,T716I,S982A,D1118H	TRUE
EPI_ISL_865725	2020-12-18	delH69V70,Y145del,N501Y,A570D,D614G,P681H,T716I,S982A,D1118H	TRUE
EPI_ISL_865731	2020-12-18	delH69V70,Y145del,N501Y,A570D,D614G,P681H,T716I,S982A,D1118H	TRUE
EPI_ISL_865729	2020-12-18	delH69V70,Y145del,N501Y,A570D,D614G,P681H,T716I,S982A,D1118H	TRUE
EPI_ISL_916153	2020-11-20	delH69V70,Y145del,N501Y,A570D,D614G,P681H,T716I,S982A,D1118H	TRUE
EPI_ISL_916145	2020-11-19	delH69V70,Y145del,N501Y,A570D,D614G,P681H,T716I,S982A,D1118H	TRUE
EPI_ISL_916131	2020-11-19	delH69V70,Y145del,N501Y,A570D,D614G,P681H,T716I,S982A,D1118H	TRUE
EPI_ISL_865730	2020-12-18	delH69V70,Y145del,N501Y,A570D,D614G,P681H,T716I,S982A,D1118H	TRUE
EPI_ISL_647373	2020-11-02	delH69V70,Y145del,N501Y,A570D,D614G,P681H,T716I,S982A,D1118H	TRUE
EPI_ISL_629597	2020-10-21	delH69V70,Y145del,N501Y,A570D,D614G,P681H,T716I,S982A,D1118H	TRUE
EPI_ISL_647389	2020-11-03	delH69V70,Y145del,N501Y,A570D,D614G,P681H,T716I,S982A,D1118H	TRUE
EPI_ISL_661641	2020-11-12	delH69V70,Y145del,N501Y,A570D,D614G,P681H,A706V,T716I,S982A,D1118H	TRUE
EPI_ISL_643877	2020-10-30	delH69V70,Y145del,N501Y,A570D,D614G,P681H,T716I,S982A,D1118H	TRUE
EPI_ISL_655860	2020-11-08	delH69V70,Y145del,N501Y,A570D,D614G,P681H,T716I,S982A,D1118H	TRUE
EPI_ISL_916165	2020-11-19	delH69V70,Y145del,N501Y,A570D,D614G,P681H,T716I,S982A,D1118H	TRUE
EPI_ISL_659330	2020-11-05	delH69V70,Y145del,N501Y,A570D,D614G,P681H,T716I,S982A,D1118H	TRUE
EPI_ISL_916154	2020-11-19	delH69V70,Y145del,N501Y,A570D,D614G,P681H,T716I,S982A,D1118H	TRUE
EPI_ISL_661646	2020-11-14	delH69V70,Y145del,N501Y,A570D,D614G,P681H,T716I,S982A,D1118H	TRUE
EPI_ISL_661705	2020-11-14	delH69V70,Y145del,N501Y,A570D,D614G,P681H,T716I,S982A,D1118H	TRUE
EPI_ISL_661711	2020-11-11	delH69V70,Y145del,N501Y,A570D,D614G,P681H,T716I,S982A,D1118H	TRUE
EPI_ISL_659356	2020-11-05	delH69V70,Y145del,N501Y,A570D,D614G,P681H,T716I,S982A,D1118H	TRUE
EPI_ISL_661656	2020-11-12	delH69V70,Y145del,N501Y,A570D,D614G,P681H,A706V,T716I,S982A,D1118H	TRUE
EPI_ISL_661662	2020-11-14	delH69V70,Y145del,N501Y,A570D,D614G,P681H,T716I,S982A,D1118H	TRUE
EPI_ISL_659366	2020-11-05	delH69V70,Y145del,N501Y,A570D,D614G,P681H,T716I,S982A,D1118H	TRUE
EPI_ISL_661654	2020-11-11	delH69V70,Y145del,N501Y,A570D,D614G,P681H,T716I,S982A,D1118H	TRUE
EPI_ISL_647422	2020-11-02	delH69V70,Y145del,N501Y,A570D,D614G,P681H,T716I,S982A,D1118H	TRUE
EPI_ISL_661652	2020-11-11	delH69V70,Y145del,N501Y,A570D,D614G,P681H,T716I,S982A,D1118H	TRUE
EPI_ISL_661682	2020-11-14	delH69V70,Y145del,N501Y,A570D,D614G,P681H,T716I,S982A,D1118H	TRUE
EPI_ISL_661713	2020-11-11	delH69V70,Y145del,N501Y,A570D,D614G,P681H,A706V,T716I,S982A,D1118H	TRUE
EPI_ISL_661717	2020-11-11	delH69V70,Y145del,N501Y,A570D,D614G,P681H,T716I,S982A,D1118H	TRUE
EPI_ISL_667837	2020-11-12	delH69V70,Y145del,N501Y,A570D,D614G,P681H,T716I,S982A,D1118H	TRUE
EPI_ISL_661702	2020-11-12	delH69V70,Y145del,N501Y,A570D,D614G,P681H,T716I,S982A,D1118H	TRUE
EPI_ISL_667834	2020-11-12	delH69V70,Y145del,S221L,N501Y,A570D,D614G,P681H,T716I,S982A,D1118H	TRUE
EPI_ISL_661707	2020-11-14	delH69V70,Y145del,N501Y,A570D,D614G,P681H,T716I,S982A,D1118H	TRUE
EPI_ISL_673639	2020-11-15	delH69V70,Y145del,N501Y,A570D,D614G,P681H,T716I,S982A,D1118H	TRUE
EPI_ISL_673634	2020-11-14	delH69V70,Y145del,N501Y,A570D,D614G,P681H,T716I,S982A,D1118H,E1207A	TRUE
EPI_ISL_674990	2020-11-13	delH69V70,Y145del,N501Y,A570D,D614G,P681H,T716I,S982A,D1118H	TRUE
EPI_ISL_673636	2020-11-15	delH69V70,Y145del,N501Y,A570D,D614G,P681H,T716I,S982A,D1118H	TRUE
EPI_ISL_718401	2020-12-10	delH69V70,Y145del,N501Y,A570D,D614G,P681H,T716I,A846V,S982A,D1118H	TRUE
EPI_ISL_667839	2020-11-12	delH69V70,Y145del,N501Y,A570D,D614G,P681H,T716I,S982A,D1118H	TRUE
EPI_ISL_705114	2020-11-22	delH69V70,Y145del,N501Y,A570D,D614G,P681H,T716I,S982A,D1118H	TRUE
EPI_ISL_673661	2020-11-15	delH69V70,Y145del,N501Y,A570D,D614G,P681H,T716I,S982A,D1118H	TRUE
EPI_ISL_718412	2020-12-10	delH69V70,Y145del,N501Y,A570D,D614G,P681H,T716I,S982A,D1118H	TRUE
EPI_ISL_673662	2020-11-15	delH69V70,Y145del,N501Y,A570D,D614G,P681H,T716I,S982A,D1118H	TRUE
EPI_ISL_718414	2020-12-10	delH69V70,Y145del,N501Y,A570D,D614G,P681H,T716I,S982A,D1118H	TRUE
EPI_ISL_705103	2020-11-22	delH69V70,Y145del,N501Y,A570D,D614G,P681H,T716I,P812S,S982A,D1118H	TRUE
EPI_ISL_718413	2020-12-10	delH69V70,Y145del,N501Y,A570D,D614G,P681H,T716I,S982A,D1118H	TRUE
EPI_ISL_718419	2020-12-10	H49Y,delH69V70,Y145del,N501Y,A570D,D614G,P681H,T716I,S982A,D1118H	TRUE
EPI_ISL_718403	2020-12-10	delH69V70,Y145del,N501Y,A570D,D614G,P681H,T716I,S982A,D1118H	TRUE
EPI_ISL_705112	2020-11-23	delH69V70,Y145del,S221L,N501Y,A570D,D614G,P681H,T716I,S982A,D1118H	TRUE
EPI_ISL_720700	2020-12-03	delH69V70,Y145del,N501Y,A570D,D614G,P681H,T716I,S982A,D1118H	TRUE
EPI_ISL_718402	2020-12-10	delH69V70,Y145del,N501Y,A570D,D614G,P681H,T716I,S982A,D1118H	TRUE
EPI_ISL_718425	2020-12-10	delH69V70,Y145del,N501Y,A570D,D614G,P681H,T716I,S982A,D1118H	TRUE
EPI_ISL_718421	2020-12-10	delH69V70,Y145del,N501Y,A570D,D614G,P681H,T716I,S982A,D1118H	TRUE
EPI_ISL_720721	2020-12-02	delH69V70,Y145del,N501Y,A570D,D614G,P681H,T716I,S982A,D1118H	TRUE
EPI_ISL_718422	2020-12-10	delH69V70,Y145del,N501Y,A570D,D614G,P681H,T716I,S982A,D1118H	TRUE
EPI_ISL_718429	2020-12-10	delH69V70,Y145del,N501Y,A570D,D614G,P681H,T716I,S982A,D1118H	TRUE
EPI_ISL_718410	2020-12-10	delH69V70,Y145del,N501Y,A570D,D614G,P681H,T716I,S982A,D1118H	TRUE
EPI_ISL_718427	2020-12-10	delH69V70,Y145del,N501Y,A570D,D614G,P681H,T716I,S982A,D1118H	TRUE
EPI_ISL_718426	2020-12-10	delH69V70,Y145del,N501Y,A570D,D614G,P681H,T716I,S982A,D1118H	TRUE
EPI_ISL_679816	2020-11-02	delH69V70,Y145del,N501Y,A570D,D614G,P681H,T716I,S982A,D1118H	TRUE
EPI_ISL_720705	2020-12-02	delH69V70,Y145del,N501Y,A570D,D614G,P681H,T716I,S982A,D1118H	TRUE
EPI_ISL_720708	2020-12-02	delH69V70,Y145del,N501Y,A570D,D614G,P681H,T716I,S982A,D1118H	TRUE
EPI_ISL_718420	2020-12-10	delH69V70,Y145del,N501Y,A570D,D614G,P681H,T716I,S982A,D1118H	TRUE
EPI_ISL_718428	2020-12-10	delH69V70,Y145del,N501Y,A570D,D614G,P681H,T716I,S982A,D1118H	TRUE
EPI_ISL_720731	2020-12-02	delH69V70,Y145del,N501Y,A570D,D614G,P681H,T716I,S982A,D1118H	TRUE
EPI_ISL_720739	2020-12-02	delH69V70,Y145del,N501Y,A570D,D614G,P681H,T716I,S982A,D1118H	TRUE
EPI_ISL_720729	2020-12-02	delH69V70,Y145del,N501Y,A570D,D614G,P681H,T716I,S982A,D1118H	TRUE
EPI_ISL_720737	2020-12-03	delH69V70,Y145del,N501Y,A570D,D614G,P681H,A706V,T716I,S982A,D1118H	TRUE
EPI_ISL_720720	2020-12-02	delH69V70,Y145del,N501Y,A570D,D614G,P681H,T716I,S982A,D1118H	TRUE
EPI_ISL_725518	2020-12-05	delH69V70,Y145del,S221L,N501Y,A570D,D614G,P681H,T716I,S982A,D1118H	TRUE
EPI_ISL_736211	2020-12-11	delH69V70,Y145del,N501Y,A570D,D614G,P681H,T716I,S982A,D1118H	TRUE
EPI_ISL_736217	2020-12-11	delH69V70,Y145del,N501Y,A570D,D614G,P681H,T716I,S982A,D1118H	TRUE
EPI_ISL_736213	2020-12-11	delH69V70,Y145del,N501Y,A570D,D614G,P681H,T716I,S982A,D1118H	TRUE
EPI_ISL_736215	2020-12-12	delH69V70,Y145del,H146Q,N501Y,A570D,D614G,P681H,T716I,S982A,D1118H	TRUE
EPI_ISL_720743	2020-12-02	delH69V70,Y145del,N501Y,A570D,D614G,P681H,T716I,S982A,D1118H	TRUE
EPI_ISL_736216	2020-12-11	delH69V70,Y145del,N501Y,A570D,D614G,P681H,T716I,S982A,D1118H	TRUE
EPI_ISL_736218	2020-12-11	delH69V70,Y145del,N501Y,A570D,D614G,P681H,T716I,I909V,S982A,D1118H	TRUE
EPI_ISL_736224	2020-12-11	delH69V70,Y145del,N501Y,A570D,D614G,P681H,T716I,S982A,D1118H	TRUE
EPI_ISL_736210	2020-12-12	delH69V70,Y145del,N501Y,A570D,D614G,P681H,T716I,S982A,D1118H	TRUE
EPI_ISL_736226	2020-12-11	delH69V70,Y145del,N501Y,A570D,D614G,P681H,T716I,S982A,D1118H	TRUE
EPI_ISL_736225	2020-12-11	delH69V70,Y145del,N501Y,A570D,D614G,P681H,T716I,S982A,D1118H	TRUE
EPI_ISL_736220	2020-12-12	delH69V70,Y145del,N501Y,A570D,D614G,P681H,T716I,S982A,D1118H	TRUE
EPI_ISL_736233	2020-12-11	delH69V70,Y145del,N501Y,A570D,D614G,P681H,T716I,S982A,D1118H	TRUE
EPI_ISL_736228	2020-12-11	delH69V70,Y145del,N501Y,A570D,D614G,P681H,T716I,S982A,D1118H	TRUE
EPI_ISL_736227	2020-12-11	delH69V70,Y145del,N501Y,A570D,D614G,P681H,T716I,S982A,D1118H	TRUE
EPI_ISL_736254	2020-12-12	delH69V70,Y145del,N501Y,A570D,D614G,P681H,T716I,S982A,D1118H	TRUE
EPI_ISL_736248	2020-12-12	L18F,delH69V70,Y145del,N501Y,A570D,D614G,P681H,T716I,S982A,D1118H	TRUE
EPI_ISL_736229	2020-12-11	delH69V70,S71F,Y145del,N501Y,A570D,D614G,P681H,T716I,S982A,D1118H	TRUE
EPI_ISL_736256	2020-12-12	delH69V70,Y145del,N501Y,A570D,D614G,P681H,T716I,S982A,D1118H	TRUE
EPI_ISL_736245	2020-12-12	delH69V70,Y145del,N501Y,A570D,D614G,P681H,T716I,S982A,D1118H	TRUE
EPI_ISL_736244	2020-12-12	delH69V70,Y145del,N501Y,A570D,D614G,P681H,T716I,S982A,D1118H	TRUE
EPI_ISL_736240	2020-12-08	delH69V70,Y145del,N501Y,A570D,D614G,P681H,T716I,S982A,D1118H	TRUE
EPI_ISL_736241	2020-12-12	delH69V70,Y145del,N501Y,A570D,D614G,P681H,T716I,S982A,D1118H	TRUE
EPI_ISL_736237	2020-12-12	delH69V70,Y145del,N501Y,A570D,D614G,V622F,P681H,T716I,S982A,D1118H	TRUE
EPI_ISL_736260	2020-12-11	delH69V70,Y145del,N501Y,A570D,D614G,P681H,T716I,S982A,D1118H	TRUE
EPI_ISL_736252	2020-12-08	delH69V70,Y145del,N501Y,A570D,D614G,P681H,T716I,S982A,D1118H	TRUE
EPI_ISL_736263	2020-12-11	delH69V70,Y145del,N501Y,A570D,D614G,P681H,T716I,S982A,D1118H	TRUE
EPI_ISL_736259	2020-12-12	delH69V70,Y145del,N501Y,A570D,D614G,P681H,T716I,S982A,D1118H	TRUE
EPI_ISL_736270	2020-12-11	delH69V70,Y145del,N501Y,A570D,D614G,P681H,T716I,S982A,D1118H	TRUE
EPI_ISL_736282	2020-12-11	delH69V70,Y145del,R357K,N501Y,A570D,D614G,P681H,T716I,S982A,D1118H	TRUE
EPI_ISL_736278	2020-12-11	delH69V70,Y145del,N501Y,A570D,D614G,P681H,T716I,S982A,D1118H	TRUE
EPI_ISL_736283	2020-12-11	delH69V70,Y145del,N501Y,A570D,D614G,P681H,T716I,S982A,D1118H	TRUE
EPI_ISL_736268	2020-12-11	delH69V70,Y145del,N501Y,A570D,D614G,P681H,T716I,S982A,D1118H	TRUE
EPI_ISL_736264	2020-12-08	delH69V70,Y145del,N501Y,A570D,D614G,P681H,A706V,T716I,S982A,D1118H	TRUE
EPI_ISL_736285	2020-12-12	delH69V70,Y145del,N501Y,A570D,D614G,P681H,T716I,S982A,D1118H	TRUE
EPI_ISL_736287	2020-12-12	delH69V70,Y145del,N501Y,A570D,D614G,P681H,T716I,S982A,D1118H	TRUE
EPI_ISL_736284	2020-12-12	delH69V70,Y145del,N501Y,A570D,D614G,P681H,T716I,S982A,D1118H	TRUE
EPI_ISL_736288	2020-12-11	delH69V70,Y145del,N501Y,A570D,D614G,P681H,T716I,S982A,D1118H	TRUE
EPI_ISL_736274	2020-12-08	delH69V70,Y145del,N501Y,A570D,D614G,P681H,T716I,S982A,D1118H	TRUE
EPI_ISL_756705	2020-12-16	delH69V70,Y145del,N501Y,A570D,D614G,P681H,T716I,S982A,D1118H	TRUE
EPI_ISL_756707	2020-12-14	delH69V70,Y145del,T323I,N501Y,A570D,D614G,P681H,T716I,S982A,D1118H	TRUE
EPI_ISL_756712	2020-12-15	delH69V70,Y145del,N501Y,A570D,D614G,P681H,T716I,S982A,D1118H	TRUE
EPI_ISL_756710	2020-12-15	delH69V70,Y145del,N501Y,A570D,D614G,P681H,T716I,S982A,D1118H	TRUE
EPI_ISL_756706	2020-12-16	F4S,delH69V70,Y145del,N501Y,A570D,D614G,P681H,T716I,S982A,D1118H	TRUE
EPI_ISL_736289	2020-12-08	delH69V70,Y145del,N501Y,A570D,D614G,P681H,T716I,S982A,D1118H	TRUE
EPI_ISL_756711	2020-12-16	delH69V70,Y145del,N501Y,A570D,D614G,P681H,T716I,S982A,D1118H	TRUE
EPI_ISL_736291	2020-12-12	delH69V70,Y145del,N501Y,A570D,D614G,P681H,T716I,S982A,D1118H	TRUE
EPI_ISL_756700	2020-12-15	delH69V70,Y145del,N501Y,A570D,D614G,P681H,T716I,S982A,D1118H	TRUE
EPI_ISL_761214	2020-12-17	delH69V70,Y145del,N501Y,A570D,D614G,P681H,T716I,S982A,D1118H	TRUE
EPI_ISL_756709	2020-12-16	delH69V70,Y145del,N501Y,A570D,D614G,P681H,T716I,S982A,D1118H	TRUE
EPI_ISL_761202	2020-12-17	delH69V70,Y145del,N501Y,A570D,D614G,P681H,S704L,T716I,S982A,D1118H	TRUE
EPI_ISL_761232	2020-12-17	delH69V70,Y145del,L216F,N501Y,A570D,D614G,P681H,T716I,S982A,D1118H	TRUE
EPI_ISL_761233	2020-12-17	delH69V70,Y145del,N501Y,A570D,D614G,P681H,T716I,S982A,D1118H	TRUE
EPI_ISL_756713	2020-12-15	delH69V70,Y145del,N501Y,A570D,D614G,P681H,T716I,S982A,D1118H	TRUE
EPI_ISL_761224	2020-12-18	delH69V70,Y145del,N501Y,A570D,D614G,P681H,T716I,S982A,D1118H	TRUE
EPI_ISL_761286	2020-12-18	delH69V70,Y145del,N501Y,A570D,D614G,P681H,T716I,S982A,D1118H	TRUE
EPI_ISL_761299	2020-12-17	delH69V70,Y145del,N501Y,A570D,D614G,P681H,T716I,S982A,D1118H	TRUE
EPI_ISL_756708	2020-12-15	delH69V70,Y145del,N501Y,A570D,D614G,P681H,T716I,S982A,D1118H	TRUE
EPI_ISL_761213	2020-12-18	delH69V70,Y145del,N501Y,A570D,D614G,P681H,T716I,S982A,D1118H	TRUE
EPI_ISL_761288	2020-12-17	delH69V70,Y145del,N501Y,A570D,D614G,P681H,T716I,S982A,D1118H	TRUE
EPI_ISL_761217	2020-12-18	delH69V70,Y145del,N501Y,A570D,D614G,P681H,T716I,S982A,D1118H	TRUE
EPI_ISL_762508	2020-12-17	delH69V70,Y145del,N501Y,A570D,D614G,P681H,T716I,S982A,D1118H	TRUE
EPI_ISL_761294	2020-12-18	delH69V70,Y145del,N501Y,A570D,D614G,P681H,T716I,S982A,D1118H	TRUE
EPI_ISL_762509	2020-12-15	delH69V70,S98F,Y145del,N501Y,A570D,D614G,P681H,T716I,S982A,D1118H	TRUE
EPI_ISL_762516	2020-12-15	delH69V70,Y145del,N501Y,A570D,D614G,P681H,T716I,S982A,D1118H	TRUE
EPI_ISL_762515	2020-12-18	delH69V70,Y145del,N501Y,A570D,D614G,P681H,T716I,S982A,D1118H	TRUE
EPI_ISL_762514	2020-12-16	delH69V70,Y145del,N501Y,A570D,D614G,P681H,A706V,T716I,S982A,D1118H	TRUE
EPI_ISL_762512	2020-12-16	delH69V70,Y145del,N501Y,A570D,D614G,P681H,T716I,S982A,D1118H	TRUE
EPI_ISL_762501	2020-12-16	delH69V70,Y145del,N501Y,A570D,D614G,P681H,T716I,S982A,D1118H	TRUE
EPI_ISL_762513	2020-12-17	delH69V70,Y145del,N501Y,A570D,D614G,P681H,T716I,S982A,D1118H	TRUE
EPI_ISL_762519	2020-12-15	delH69V70,Y145del,N501Y,A570D,D614G,P681H,T716I,A831V,S982A,D1118H	TRUE
EPI_ISL_762520	2020-12-15	delH69V70,Y145del,N501Y,A570D,D614G,P681H,T716I,S982A,D1118H	TRUE
EPI_ISL_762505	2020-12-15	delH69V70,Y145del,N501Y,A570D,D614G,P681H,T716I,S982A,D1118H	TRUE
EPI_ISL_762525	2020-12-17	delH69V70,Y145del,N501Y,A570D,D614G,P681H,T716I,S982A,D1118H	TRUE
EPI_ISL_762522	2020-12-16	delH69V70,Y145del,N501Y,A570D,D614G,P681H,T716I,S982A,D1118H	TRUE
EPI_ISL_762530	2020-12-16	delH69V70,Y145del,N501Y,A570D,D614G,P681H,T716I,S982A,D1118H	TRUE
EPI_ISL_762528	2020-12-16	delH69V70,Y145del,N501Y,A570D,D614G,P681H,T716I,S982A,D1118H	TRUE
EPI_ISL_762533	2020-12-16	delH69V70,Y145del,N501Y,A570D,D614G,P681H,T716I,S982A,D1118H,H1159L	TRUE
EPI_ISL_762537	2020-12-17	delH69V70,Y145del,N501Y,A570D,D614G,P681H,T716I,S982A,D1118H	TRUE
EPI_ISL_762534	2020-12-16	delH69V70,Y145del,N501Y,A570D,D614G,P681H,T716I,S982A,D1118H	TRUE
EPI_ISL_762527	2020-12-17	delH69V70,Y145del,N501Y,A570D,D614G,P681H,T716I,S982A,D1118H	TRUE
EPI_ISL_762529	2020-12-16	delH69V70,S98F,Y145del,N501Y,A570D,D614G,P681H,T716I,S982A,D1118H	TRUE
EPI_ISL_762517	2020-12-16	delH69V70,Y145del,N501Y,A570D,D614G,P681H,T716I,S982A,D1118H	TRUE
EPI_ISL_762535	2020-12-17	delH69V70,Y145del,N501Y,A570D,D614G,P681H,T716I,S982A,D1118H	TRUE
EPI_ISL_762526	2020-12-17	delH69V70,Y145del,N501Y,A570D,D614G,P681H,T716I,S982A,D1118H	TRUE
EPI_ISL_762545	2020-12-16	delH69V70,Y145del,N501Y,A570D,D614G,P681H,T716I,S982A,D1118H	TRUE
EPI_ISL_762531	2020-12-17	delH69V70,Y145del,N501Y,A570D,D614G,P681H,T716I,S982A,D1118H	TRUE
EPI_ISL_762546	2020-12-17	delH69V70,Y145del,N501Y,A570D,D614G,P681H,T716I,S982A,D1118H	TRUE
EPI_ISL_762536	2020-12-17	V6A,delH69V70,Y145del,N501Y,A570D,D614G,P681H,T716I,S982A,D1118H	TRUE
EPI_ISL_762538	2020-12-17	delH69V70,Y145del,N501Y,A570D,D614G,P681H,T716I,S982A,D1118H	TRUE
EPI_ISL_762544	2020-12-17	delH69V70,Y145del,S494P,N501Y,A570D,D614G,P681H,T716I,S982A,D1118H	TRUE
EPI_ISL_762532	2020-12-16	delH69V70,Y145del,N501Y,A570D,D614G,P681H,T716I,S982A,D1118H	TRUE
EPI_ISL_762552	2020-12-17	delH69V70,Y145del,N501Y,A570D,D614G,P681H,T716I,A845V,S982A,D1118H	TRUE
EPI_ISL_762540	2020-12-16	delH69V70,Y145del,N501Y,A570D,D614G,P681H,T716I,S982A,D1118H	TRUE
EPI_ISL_762551	2020-12-17	delH69V70,Y145del,N501Y,A570D,D614G,P681H,T716I,S982A,D1118H	TRUE
EPI_ISL_762541	2020-12-16	delH69V70,Y145del,N501Y,A570D,D614G,P681H,T716I,S982A,D1118H	TRUE
EPI_ISL_762550	2020-12-17	delH69V70,Y145del,N501Y,A570D,D614G,P681H,T716I,S982A,D1118H	TRUE
EPI_ISL_762548	2020-12-16	delH69V70,Y145del,N501Y,A570D,A575S,D614G,P681H,A706V,T716I,S982A,D1118H	TRUE
EPI_ISL_762557	2020-12-16	delH69V70,Y145del,N501Y,A570D,D614G,P681H,T716I,S982A,D1118H	TRUE
EPI_ISL_762554	2020-12-16	delH69V70,Y145del,N501Y,A570D,D614G,P681H,T716I,S982A,D1118H	TRUE
EPI_ISL_762560	2020-12-16	delH69V70,Y145del,N501Y,A570D,D614G,P681H,T716I,S982A,D1118H	TRUE
EPI_ISL_762553	2020-12-17	delH69V70,Y145del,N501Y,A570D,D614G,P681H,T716I,S982A,D1118H	TRUE
EPI_ISL_762547	2020-12-16	delH69V70,Y145del,N501Y,A570D,D614G,P681H,T716I,S982A,D1118H	TRUE
EPI_ISL_762561	2020-12-16	delH69V70,Y145del,N501Y,A570D,D614G,P681H,T716I,S982A,D1118H	TRUE
EPI_ISL_762555	2020-12-16	delH69V70,Y145del,N501Y,A570D,D614G,P681H,T716I,S982A,D1118H	TRUE
EPI_ISL_763813	2020-12-17	delH69V70,N501Y,A570D,D614G,P681H,T716I,S884F,S982A,D1118H	TRUE
EPI_ISL_762565	2020-12-17	delH69V70,Y145del,N501Y,A570D,D614G,P681H,T716I,S982A,D1118H	TRUE
EPI_ISL_762559	2020-12-17	delH69V70,Y145del,N501Y,A570D,D614G,P681H,T716I,S982A,D1118H	TRUE
EPI_ISL_762556	2020-12-16	delH69V70,Y145del,N501Y,A570D,D614G,P681H,T716I,K790R,S982A,D1118H	TRUE
EPI_ISL_763811	2020-12-16	delH69V70,N501Y,A570D,D614G,P681H,T716I,S982A,D1118H	TRUE
EPI_ISL_762564	2020-12-16	delH69V70,Y145del,N501Y,A570D,D614G,P681H,T716I,S982A,D1118H	TRUE
EPI_ISL_763826	2020-12-17	delH69V70,Y145del,N501Y,A570D,D614G,P681H,T716I,S982A,D1118H	TRUE
EPI_ISL_763844	2020-12-14	delH69V70,Y145del,N501Y,A570D,D614G,P681H,T716I,S982A,D1118H	TRUE
EPI_ISL_763841	2020-12-10	delH69V70,Y145del,N501Y,A570D,D614G,P681H,T716I,S982A,D1118H	TRUE
EPI_ISL_763838	2020-12-15	delH69V70,E96D,Y145del,N501Y,A570D,D614G,P681H,T716I,S982A,D1118H	TRUE
EPI_ISL_763835	2020-12-18	delH69V70,Y145del,N501Y,A570D,D614G,P681H,T716I,S982A,D1118H	TRUE
EPI_ISL_763810	2020-12-18	delH69V70,Y145del,N501Y,A570D,D614G,P681H,T716I,S982A,D1118H	TRUE
EPI_ISL_763848	2020-12-03	delH69V70,Y145del,N501Y,A570D,D614G,P681H,T716I,S939F,S982A,D1118H	TRUE
EPI_ISL_763849	2020-12-14	delH69V70,Y145del,N501Y,A570D,D614G,P681H,T716I,S982A,D1118H	TRUE
EPI_ISL_763859	2020-12-13	delH69V70,Y145del,N501Y,A570D,D614G,P681H,T716I,M740V,S982A,D1118H	TRUE
EPI_ISL_763860	2020-12-14	delH69V70,Y145del,N501Y,A570D,D614G,P681H,T716I,S982A,D1118H	TRUE
EPI_ISL_763845	2020-12-16	delH69V70,Y145del,N501Y,A570D,D614G,P681H,T716I,S982A,D1118H	TRUE
EPI_ISL_763863	2020-12-15	A67S,delH69V70,Y145del,N501Y,A570D,D614G,P681H,T716I,S982A,D1118H	TRUE
EPI_ISL_763861	2020-12-13	delH69V70,Y145del,N501Y,A570D,D614G,P681H,T716I,S982A,D1118H	TRUE
EPI_ISL_763875	2020-12-14	delH69V70,Y145del,S494P,N501Y,A570D,D614G,P681H,T716I,S982A,D1118H	TRUE
EPI_ISL_763846	2020-12-16	delH69V70,Y145del,N501Y,A570D,D614G,P681H,T716I,S982A,D1118H	TRUE
EPI_ISL_763874	2020-12-14	delH69V70,Y145del,N501Y,A570D,D614G,P681H,T716I,S982A,D1118H	TRUE
EPI_ISL_763862	2020-12-14	delH69V70,Y145del,N501Y,A570D,D614G,P681H,T716I,S982A,D1118H	TRUE
EPI_ISL_763878	2020-12-14	delH69V70,Y145del,N501Y,A570D,D614G,P681H,T716I,S982A,D1118H	TRUE
EPI_ISL_763873	2020-11-27	delH69V70,Y145del,N501Y,A570D,D614G,P681H,T716I,S939F,S982A,D1118H	TRUE
EPI_ISL_763865	2020-12-18	delH69V70,Y145del,N501Y,A570D,D614G,P681H,T716I,S982A,K1073M,D1118H	TRUE
EPI_ISL_763872	2020-11-30	delH69V70,Y145del,N501Y,A570D,D614G,P681H,T716I,S982A,D1118H	TRUE
EPI_ISL_763876	2020-12-14	delH69V70,Y145del,S494P,N501Y,A570D,D614G,P681H,T716I,S982A,D1118H	TRUE
EPI_ISL_778011	2020-12-18	delH69V70,Y145del,N501Y,A570D,D614G,P681H,T716I,S982A,D1118H	TRUE
EPI_ISL_763880	2020-12-14	delH69V70,Y145del,N501Y,A570D,D614G,P681H,T716I,S982A,D1118H	TRUE
EPI_ISL_763877	2020-12-14	delH69V70,Y145del,S494P,N501Y,A570D,D614G,P681H,T716I,S982A,D1118H	TRUE
EPI_ISL_778010	2020-12-18	delH69V70,Y145del,N501Y,A570D,D614G,P681H,T716I,P812S,S982A,D1118H	TRUE
EPI_ISL_778012	2020-12-18	delH69V70,Y145del,N501Y,A570D,D614G,P681H,T716I,S982A,D1118H	TRUE
EPI_ISL_763879	2020-12-14	delH69V70,Y145del,N501Y,A570D,D614G,P681H,T716I,S982A,D1118H	TRUE
EPI_ISL_778013	2020-12-18	delH69V70,Y145del,N501Y,A570D,D614G,P681H,T716I,S982A,D1118H	TRUE
EPI_ISL_763881	2020-12-14	delH69V70,Y145del,N501Y,A570D,D614G,P681H,T716I,S982A,D1118H	TRUE
EPI_ISL_778019	2020-12-18	delH69V70,Y145del,N501Y,A570D,D614G,P681H,T716I,S982A,D1118H	TRUE
EPI_ISL_778087	2020-12-18	delH69V70,Y145del,N501Y,A570D,D614G,P681H,T716I,S982A,D1118H	TRUE
EPI_ISL_778071	2020-12-18	delH69V70,Y145del,N501Y,A570D,D614G,P681H,T716I,S982A,D1118H	TRUE
EPI_ISL_763869	2020-12-18	delH69V70,Y145del,N501Y,A570D,D614G,P681H,T716I,S982A,D1118H	TRUE
EPI_ISL_778015	2020-12-18	delH69V70,Y145del,N501Y,A570D,D614G,P681H,T716I,S982A,D1118H	TRUE
EPI_ISL_778028	2020-12-18	delH69V70,Y145del,N501Y,A570D,D614G,P681H,T716I,S982A,D1118H	TRUE
EPI_ISL_778020	2020-12-18	delH69V70,Y145del,N501Y,A570D,D614G,P681H,T716I,S982A,D1118H	TRUE
EPI_ISL_778094	2020-12-18	delH69V70,Y145del,N501Y,A570D,D614G,P681H,T716I,S982A,D1118H	TRUE
EPI_ISL_781665	2020-12-18	delH69V70,Y145del,N501Y,A570D,D614G,P681H,T716I,S982A,D1118H	TRUE
EPI_ISL_778072	2020-12-18	delH69V70,Y145del,N501Y,A570D,D614G,P681H,T716I,S982A,D1118H	TRUE
EPI_ISL_778027	2020-12-18	delH69V70,Y145del,N501Y,A570D,D614G,P681H,T716I,S982A,D1118H	TRUE
EPI_ISL_781666	2020-12-18	delH69V70,Y145del,N501Y,A570D,D614G,P681H,T716I,S982A,D1118H	TRUE
EPI_ISL_778075	2020-12-18	P26H,delH69V70,Y145del,N501Y,A570D,D614G,P681H,T716I,S982A,D1118H	TRUE
EPI_ISL_781656	2020-12-18	delH69V70,Y145del,N501Y,A570D,D614G,P681H,T716I,S982A,D1118H	TRUE
EPI_ISL_781671	2020-12-14	delH69V70,Y145del,N501Y,A570D,D614G,P681H,T716I,S982A,D1118H	TRUE
EPI_ISL_781669	2020-12-18	delH69V70,Y145del,N501Y,A570D,D614G,P681H,T716I,S982A,D1118H	TRUE
EPI_ISL_782992	2020-12-07	delH69V70,V143del,Y144F,N501Y,A570D,D614G,P681H,T716I,S982A,D1118H	TRUE
EPI_ISL_778091	2020-12-18	delH69V70,Y145del,N501Y,A570D,D614G,P681H,T716I,S982A,D1118H	TRUE
EPI_ISL_782986	2020-12-07	delH69V70,Y145del,N501Y,A570D,D614G,P681H,T716I,S982A,D1118H	TRUE
EPI_ISL_782984	2020-12-07	delH69V70,Y145del,N501Y,A570D,D614G,P681H,T716I,S982A,D1118H	TRUE
EPI_ISL_782985	2020-12-07	delH69V70,Y145del,N501Y,A570D,D614G,P681H,T716I,S982A,D1118H	TRUE
EPI_ISL_782991	2020-12-07	delH69V70,Y145del,N501Y,A570D,D614G,P681H,T716I,S982A,D1118H	TRUE
EPI_ISL_820130	2020-12-14	delH69V70,Y145del,N501Y,A570D,D614G,P681H,T716I,S982A,D1118H	TRUE
EPI_ISL_782987	2020-12-07	delH69V70,Y145del,N501Y,A570D,D614G,P681H,T716I,S982A,D1118H	TRUE
EPI_ISL_782983	2020-12-07	delH69V70,Y145del,N501Y,A570D,D614G,P681H,T716I,S982A,D1118H	TRUE
EPI_ISL_782997	2020-12-06	delH69V70,Y145del,N501Y,A570D,D614G,P681H,T716I,S982A,D1118H	TRUE
EPI_ISL_841773	2020-12-16	delH69V70,Y145del,N501Y,A570D,D614G,P681H,T716I,S982A,D1118H	TRUE
EPI_ISL_841783	2020-12-16	delH69V70,Y145del,N501Y,A570D,D614G,P681H,T716I,S982A,D1118H	TRUE
EPI_ISL_841790	2020-12-16	delH69V70,Y145del,N501Y,A570D,D614G,P681H,T716I,S982A,D1118H	TRUE
EPI_ISL_841787	2020-12-16	delH69V70,Y145del,N501Y,A570D,D614G,P681H,T716I,S982A,D1118H	TRUE
EPI_ISL_841780	2020-12-15	delH69V70,Y145del,N501Y,A570D,D614G,P681H,T716I,S982A,D1118H,C1243F	TRUE
EPI_ISL_841785	2020-12-16	delH69V70,Y145del,N501Y,A570D,D614G,P681H,T716I,S982A,D1118H	TRUE
EPI_ISL_841798	2020-12-16	delH69V70,Y145del,N501Y,A570D,D614G,P681H,T716I,S982A,D1118H	TRUE
EPI_ISL_841772	2020-12-16	delH69V70,Y145del,N501Y,A570D,D614G,P681H,T716I,S982A,D1118H	TRUE
EPI_ISL_841788	2020-12-15	delH69V70,Y145del,N501Y,A570D,D614G,P681H,T716I,S982A,D1118H	TRUE
EPI_ISL_841784	2020-12-16	delH69V70,Y145del,N501Y,A570D,D614G,P681H,T716I,S982A,D1118H	TRUE
EPI_ISL_841796	2020-12-15	delH69V70,Y145del,N501Y,A570D,D614G,P681H,T716I,S982A,D1118H	TRUE
EPI_ISL_841799	2020-12-16	delH69V70,Y145del,N501Y,A570D,D614G,P681H,T716I,S982A,D1118H	TRUE
EPI_ISL_865706	2020-11-28	delH69V70,Y145del,N501Y,A570D,D614G,P681H,T716I,S982A,D1118H	TRUE
EPI_ISL_865715	2020-12-05	delH69V70,Y145del,N501Y,A570D,D614G,P681H,T716I,S982A,D1118H	TRUE
EPI_ISL_865711	2020-12-02	delH69V70,Y145del,N501Y,A570D,D614G,P681H,T716I,S982A,D1118H	TRUE
EPI_ISL_865718	2020-12-10	delH69V70,Y145del,N501Y,A570D,D614G,P681H,T716I,S982A,D1118H	TRUE
EPI_ISL_865719	2020-12-13	delH69V70,Y145del,N501Y,A570D,D614G,P681H,T716I,S982A,D1118H	TRUE
EPI_ISL_865717	2020-12-09	delH69V70,Y145del,N501Y,A570D,D614G,P681H,T716I,S982A,D1118H	TRUE
EPI_ISL_865713	2020-12-04	delH69V70,Y145del,N501Y,A570D,D614G,P681H,T716I,S982A,D1118H	TRUE
EPI_ISL_924790	2020-11-23	delH69V70,Y145del,N501Y,A570D,D614G,P681H,T716I,S982A,D1118H	TRUE
EPI_ISL_865721	2020-12-17	delH69V70,Y145del,N501Y,A570D,D614G,P681H,T716I,S982A,D1118H	TRUE
EPI_ISL_643863	2020-10-30	delH69V70,Y145del,N501Y,A570D,D614G,P681H,T716I,S982A,D1118H	TRUE
EPI_ISL_643853	2020-10-29	delH69V70,Y145del,N501Y,A570D,D614G,P681H,T716I,S982A,D1118H	TRUE
EPI_ISL_596982	2020-10-08	delH69V70,Y145del,N501Y,A570D,D614G,P681H,T716I,S982A,D1118H	TRUE
EPI_ISL_924791	2020-11-20	delH69V70,Y145del,N501Y,A570D,D614G,P681H,T716I,S982A,D1118H	TRUE
EPI_ISL_655826	2020-11-08	delH69V70,Y145del,N501Y,A570D,D614G,P681H,T716I,S982A,D1118H	TRUE
EPI_ISL_647309	2020-11-02	delH69V70,Y145del,N501Y,A570D,D614G,P681H,T716I,S982A,D1118H	TRUE
EPI_ISL_655825	2020-11-08	delH69V70,Y145del,N501Y,A570D,D614G,P681H,T716I,S982A,D1118H	TRUE
EPI_ISL_659300	2020-11-05	delH69V70,Y145del,N501Y,A570D,D614G,P681H,T716I,S982A,D1118H	TRUE
EPI_ISL_647341	2020-11-02	delH69V70,Y145del,N501Y,A570D,D614G,P681H,T716I,S982A,D1118H	TRUE
EPI_ISL_658014	2020-11-08	delH69V70,Y145del,N501Y,A570D,D614G,P681H,T716I,S982A,D1118H	TRUE
EPI_ISL_659345	2020-11-03	delH69V70,Y145del,N501Y,A570D,D614G,P681H,A706V,T716I,S982A,D1118H	TRUE
EPI_ISL_659305	2020-11-05	delH69V70,Y145del,N501Y,A570D,D614G,P681H,T716I,S982A,D1118H	TRUE
EPI_ISL_658086	2020-11-08	delH69V70,Y145del,N501Y,A570D,D614G,P681H,T716I,S982A,D1118H	TRUE
EPI_ISL_659310	2020-11-05	delH69V70,Y145del,N501Y,A570D,D614G,P681H,T716I,S982A,D1118H	TRUE
EPI_ISL_661625	2020-11-11	delH69V70,Y145del,N501Y,A570D,D614G,P681H,T716I,S982A,D1118H	TRUE
EPI_ISL_667811	2020-11-12	delH69V70,Y145del,N501Y,A570D,D614G,P681H,T716I,S982A,D1118H	TRUE
EPI_ISL_673600	2020-11-15	delH69V70,Y145del,N501Y,A570D,D614G,P681H,T716I,S982A,D1118H	TRUE
EPI_ISL_659302	2020-11-05	delH69V70,Y145del,N501Y,A570D,D614G,P681H,T716I,S982A,D1118H	TRUE
EPI_ISL_674920	2020-11-15	delH69V70,Y145del,N501Y,A570D,D614G,P681H,T716I,S982A,D1118H	TRUE
EPI_ISL_659348	2020-11-05	delH69V70,Y145del,N501Y,A570D,D614G,P681H,T716I,S982A,D1118H	TRUE
EPI_ISL_674941	2020-11-13	delH69V70,Y145del,N501Y,A570D,D614G,P681H,T716I,S982A,D1118H	TRUE
EPI_ISL_667818	2020-11-12	delH69V70,Y145del,N501Y,A570D,D614G,P681H,T716I,S982A,D1118H	TRUE
EPI_ISL_646031	2020-11-02	delH69V70,Y145del,N501Y,A570D,D614G,P681H,T716I,S982A,D1118H	TRUE
EPI_ISL_674927	2020-11-14	delH69V70,Y145del,V193L,N501Y,A570D,D614G,P681H,T716I,S982A,D1118H	TRUE
EPI_ISL_674912	2020-11-14	delH69V70,Y145del,N501Y,A570D,D614G,P681H,T716I,S982A,D1118H	TRUE
EPI_ISL_673607	2020-11-15	delH69V70,Y145del,N501Y,A570D,D614G,P681H,T716I,S982A,D1118H	TRUE
EPI_ISL_673622	2020-11-15	delH69V70,Y145del,N501Y,A570D,D614G,P681H,T716I,S982A,D1118H	TRUE
EPI_ISL_702910	2020-12-03	delH69V70,Y145del,N501Y,A570D,D614G,P681H,T716I,S982A,D1118H	TRUE
EPI_ISL_674955	2020-11-14	delH69V70,Y145del,N501Y,A570D,D614G,P681H,T716I,S982A,D1118H	TRUE
EPI_ISL_705184	2020-12-06	delH69V70,N501Y,A570D,D614G,P681H,T716I,S982A,D1118H	TRUE
EPI_ISL_702918	2020-11-19	delH69V70,Y145del,N501Y,A570D,D614G,P681H,T716I,S982A,D1118H	TRUE
EPI_ISL_705133	2020-11-20	delH69V70,Y145del,N501Y,A570D,A575S,D614G,P681H,A706V,T716I,S982A,D1118H	TRUE
EPI_ISL_674936	2020-11-15	delH69V70,Y145del,N501Y,A570D,D614G,P681H,T716I,S982A,D1118H	TRUE
EPI_ISL_705130	2020-11-22	delH69V70,Y145del,N501Y,A570D,D614G,P681H,T716I,S982A,D1118H	TRUE
EPI_ISL_705125	2020-11-22	delH69V70,Y145del,N501Y,A570D,D614G,P681H,T716I,S982A,D1118H	TRUE
EPI_ISL_705120	2020-11-22	delH69V70,Y145del,N501Y,A570D,D614G,P681H,T716I,S982A,D1118H	TRUE
EPI_ISL_705139	2020-11-22	delH69V70,Y145del,N501Y,A570D,D614G,P681H,T716I,S982A,D1118H	TRUE
EPI_ISL_705138	2020-11-23	delH69V70,Y145del,N501Y,A570D,D614G,P681H,T716I,S982A,D1118H	TRUE
EPI_ISL_705164	2020-11-23	delH69V70,Y145del,S221L,N501Y,A570D,D614G,P681H,T716I,S982A,D1118H	TRUE
EPI_ISL_718407	2020-12-10	delH69V70,Y145del,N501Y,A570D,D614G,P681H,T716I,S982A,D1118H	TRUE
EPI_ISL_705151	2020-11-22	delH69V70,Y145del,N501Y,A570D,A575S,D614G,P681H,A706V,T716I,S982A,D1118H	TRUE
EPI_ISL_705157	2020-11-22	delH69V70,Y145del,N501Y,A570D,D614G,P681H,T716I,S982A,D1118H	TRUE
EPI_ISL_718430	2020-12-10	delH69V70,Y145del,N501Y,A570D,D614G,P681H,T716I,S982A,D1118H	TRUE
EPI_ISL_705189	2020-11-22	delH69V70,Y145del,N501Y,A570D,D614G,P681H,T716I,S982A,D1118H	TRUE
EPI_ISL_718406	2020-12-10	delH69V70,Y145del,N501Y,A570D,D614G,P681H,T716I,S982A,D1118H	TRUE
EPI_ISL_718409	2020-12-10	delH69V70,Y145del,N501Y,A570D,D614G,P681H,T716I,S982A,D1118H	TRUE
EPI_ISL_718431	2020-12-10	delH69V70,Y145del,N501Y,A570D,D614G,P681H,T716I,S982A,D1118H	TRUE
EPI_ISL_718433	2020-12-10	delH69V70,Y145del,N501Y,A570D,D614G,P681H,T716I,S982A,D1118H	TRUE
EPI_ISL_718405	2020-12-10	delH69V70,Y145del,N501Y,A570D,D614G,P681H,T716I,S982A,D1118H	TRUE
EPI_ISL_718432	2020-12-10	delH69V70,Y145del,N501Y,A570D,D614G,P681H,T716I,S982A,D1118H	TRUE
EPI_ISL_718404	2020-12-10	delH69V70,Y145del,N501Y,A570D,D614G,P681H,T716I,S982A,D1118H	TRUE
EPI_ISL_718408	2020-12-10	delH69V70,Y145del,N501Y,A570D,D614G,P681H,T716I,S982A,D1118H	TRUE
EPI_ISL_718440	2020-12-10	delH69V70,Y145del,N501Y,A570D,D614G,P681H,A706V,T716I,S982A,D1118H	TRUE
EPI_ISL_718437	2020-12-10	delH69V70,Y145del,N501Y,A570D,D614G,P681H,T716I,S982A,D1118H	TRUE
EPI_ISL_718438	2020-12-10	delH69V70,Y145del,N501Y,A570D,D614G,P681H,T716I,S982A,D1118H	TRUE
EPI_ISL_718435	2020-12-10	delH69V70,Y145del,N501Y,A570D,D614G,P681H,T716I,S982A,D1118H	TRUE
EPI_ISL_718439	2020-12-10	delH69V70,Y145del,N501Y,A570D,D614G,P681H,T716I,S982A,D1118H	TRUE
EPI_ISL_718442	2020-12-10	delH69V70,Y145del,N501Y,A570D,D614G,P681H,T716I,S982A,D1118H	TRUE
EPI_ISL_718447	2020-12-10	delH69V70,Y145del,N501Y,A570D,D614G,P681H,T716I,S982A,D1118H	TRUE
EPI_ISL_718446	2020-12-10	delH69V70,Y145del,N501Y,A570D,D614G,P681H,T716I,S982A,D1118H	TRUE
EPI_ISL_718443	2020-12-10	delH69V70,Y145del,N501Y,A570D,D614G,P681H,T716I,S982A,D1118H	TRUE
EPI_ISL_718458	2020-12-10	T22I,delH69V70,Y145del,N501Y,A570D,D614G,P681H,T716I,S982A,D1118H	TRUE
EPI_ISL_718445	2020-12-10	delH69V70,Y145del,N501Y,A570D,D614G,P681H,T716I,S982A,D1118H	TRUE
EPI_ISL_718444	2020-12-10	delH69V70,Y145del,N501Y,A570D,D614G,P681H,T716I,S982A,D1118H	TRUE
EPI_ISL_718463	2020-12-10	delH69V70,Y145del,N501Y,A570D,D614G,P681H,T716I,S982A,D1118H	TRUE
EPI_ISL_718456	2020-12-10	delH69V70,Y145del,S494P,N501Y,A570D,D614G,P681H,T716I,S982A,D1118H	TRUE
EPI_ISL_718459	2020-12-10	delH69V70,Y145del,N501Y,A570D,D614G,P681H,T716I,S982A,D1118H,D1168G	TRUE
EPI_ISL_718452	2020-12-10	delH69V70,Y145del,N501Y,A570D,D614G,P681H,T716I,S982A,D1118H	TRUE
EPI_ISL_718462	2020-12-10	delH69V70,Y145del,N501Y,A570D,D614G,P681H,T716I,S982A,D1118H	TRUE
EPI_ISL_718455	2020-12-10	delH69V70,Y145del,N501Y,A570D,D614G,P681H,T716I,S982A,D1118H	TRUE
EPI_ISL_718465	2020-12-10	delH69V70,Y145del,N501Y,A570D,D614G,P681H,T716I,S982A,D1118H	TRUE
EPI_ISL_718466	2020-12-10	delH69V70,Y145del,N501Y,A570D,D614G,P681H,T716I,S982A,D1118H	TRUE
EPI_ISL_718461	2020-12-10	delH69V70,Y145del,N501Y,A570D,D614G,P681H,T716I,S982A,D1118H	TRUE
EPI_ISL_718494	2020-12-10	delH69V70,Y145del,N501Y,A570D,D614G,P681H,T716I,S982A,D1118H	TRUE
EPI_ISL_718474	2020-12-10	delH69V70,Y145del,N501Y,A570D,D614G,P681H,T716I,S982A,D1118H	TRUE
EPI_ISL_718479	2020-12-10	delH69V70,Y145del,N501Y,A570D,D614G,P681H,T716I,S982A,D1118H	TRUE
EPI_ISL_718491	2020-12-10	delH69V70,Y145del,N501Y,A570D,D614G,P681H,T716I,S982A,D1118H	TRUE
EPI_ISL_718469	2020-12-10	delH69V70,Y145del,N501Y,A570D,D614G,P681H,T716I,S982A,D1118H	TRUE
EPI_ISL_720749	2020-12-04	delH69V70,Y145del,N501Y,A570D,D614G,P681H,T716I,S982A,D1118H	TRUE
EPI_ISL_718464	2020-12-10	delH69V70,Y145del,N501Y,A570D,D614G,P681H,T716I,S982A,D1118H	TRUE
EPI_ISL_720758	2020-12-02	delH69V70,Y145del,N501Y,A570D,D614G,P681H,T716I,S982A,D1118H	TRUE
EPI_ISL_718499	2020-12-10	delH69V70,Y145del,N501Y,A570D,D614G,P681H,T716I,S982A,D1118H	TRUE
EPI_ISL_718490	2020-12-10	delH69V70,Y145del,N501Y,A570D,D614G,P681H,T716I,S982A,D1118H	TRUE
EPI_ISL_720715	2020-12-04	delH69V70,Y145del,N501Y,A570D,D614G,P681H,T716I,S982A,D1118H	TRUE
EPI_ISL_718498	2020-12-10	delH69V70,D138H,Y145del,N501Y,A570D,D614G,P681H,T716I,S982A,D1118H	TRUE
EPI_ISL_720765	2020-12-04	delH69V70,Y145del,N501Y,A570D,D614G,P681H,T716I,S982A,D1118H	TRUE
EPI_ISL_720759	2020-12-02	delH69V70,Y145del,N501Y,A570D,D614G,P681H,T716I,S982A,D1118H	TRUE
EPI_ISL_720757	2020-12-03	delH69V70,Y145del,N501Y,A570D,D614G,P681H,T716I,S982A,D1118H	TRUE
EPI_ISL_720718	2020-12-02	delH69V70,Y145del,S494P,N501Y,A570D,D614G,P681H,T716I,S982A,D1118H	TRUE
EPI_ISL_720786	2020-12-03	delH69V70,Y145del,N501Y,A570D,D614G,P681H,T716I,S982A,D1118H	TRUE
EPI_ISL_731408	2020-12-10	delH69V70,Y145del,N501Y,A570D,D614G,P681H,T716I,S982A,D1118H	TRUE
EPI_ISL_720716	2020-12-02	delH69V70,Y145del,N501Y,A570D,D614G,P681H,T716I,S982A,D1118H,K1191N	TRUE
EPI_ISL_720763	2020-12-02	delH69V70,Y145del,N501Y,A570D,D614G,P681H,T716I,S982A,D1118H	TRUE
EPI_ISL_731405	2020-12-09	delH69V70,Y145del,N501Y,A570D,D614G,P681H,T716I,S982A,D1118H	TRUE
EPI_ISL_720777	2020-12-03	delH69V70,Y145del,N501Y,A570D,D614G,P681H,T716I,S982A,D1118H	TRUE
EPI_ISL_720793	2020-12-03	delH69V70,Y145del,N501Y,A570D,D614G,P681H,A706V,T716I,S982A,D1118H	TRUE
EPI_ISL_731412	2020-12-09	delH69V70,Y145del,N501Y,A570D,D614G,P681H,T716I,S982A,D1118H	TRUE
EPI_ISL_731407	2020-12-10	delH69V70,Y145del,N501Y,A570D,D614G,P681H,T716I,S982A,D1118H	TRUE
EPI_ISL_720766	2020-12-03	delH69V70,Y145del,N501Y,A570D,D614G,P681H,T716I,S982A,D1118H	TRUE
EPI_ISL_731410	2020-12-08	delH69V70,Y145del,N501Y,A570D,D614G,P681H,T716I,S982A,D1118H	TRUE
EPI_ISL_731425	2020-12-11	delH69V70,Y145del,N501Y,A570D,D614G,P681H,T716I,S982A,D1118H	TRUE
EPI_ISL_731409	2020-12-09	delH69V70,Y145del,N501Y,A570D,D614G,P681H,T716I,S982A,D1118H	TRUE
EPI_ISL_731424	2020-12-09	delH69V70,Y145del,N501Y,A570D,D614G,P681H,T716I,S982A,D1118H	TRUE
EPI_ISL_731401	2020-12-10	A27S,delH69V70,Y145del,N501Y,A570D,D614G,P681H,T716I,S982A,D1118H	TRUE
EPI_ISL_731450	2020-12-10	delH69V70,Y145del,N501Y,A570D,D614G,P681H,T716I,S982A,D1118H	TRUE
EPI_ISL_731413	2020-12-08	delH69V70,Y145del,N501Y,A570D,D614G,P681H,T716I,S982A,D1118H	TRUE
EPI_ISL_731467	2020-12-09	delH69V70,Y145del,N501Y,A570D,D614G,P681H,T716I,S982A,D1118H	TRUE
EPI_ISL_731455	2020-12-09	delH69V70,Y145del,N501Y,A570D,D614G,P681H,T716I,S982A,D1118H	TRUE
EPI_ISL_731422	2020-12-09	delH69V70,Y145del,N501Y,A570D,D614G,P681H,T716I,S982A,D1118H	TRUE
EPI_ISL_731454	2020-12-10	delH69V70,Y145del,N501Y,A570D,D614G,P681H,T716I,S982A,D1118H	TRUE
EPI_ISL_736294	2020-12-11	delH69V70,Y145del,N501Y,A570D,D614G,P681H,T716I,S982A,D1118H	TRUE
EPI_ISL_731463	2020-12-09	delH69V70,Y145del,N501Y,A570D,D614G,P681H,T716I,S982A,D1118H	TRUE
EPI_ISL_731468	2020-12-08	delH69V70,Y145del,N501Y,A570D,D614G,P681H,T716I,S982A,D1118H	TRUE
EPI_ISL_731475	2020-12-08	delH69V70,Y145del,N501Y,A570D,D614G,P681H,T716I,S982A,D1118H	TRUE
EPI_ISL_731472	2020-12-10	delH69V70,Y145del,N501Y,A570D,D614G,P681H,T716I,S982A,D1118H	TRUE
EPI_ISL_731423	2020-12-09	delH69V70,Y145del,N501Y,A570D,D614G,P681H,T716I,S982A,D1118H	TRUE
EPI_ISL_731476	2020-12-10	delH69V70,Y145del,N501Y,A570D,D614G,P681H,T716I,S982A,D1118H	TRUE
EPI_ISL_756716	2020-12-16	delH69V70,Y145del,N501Y,A570D,D614G,P681H,T716I,S982A,D1118H	TRUE
EPI_ISL_736297	2020-12-11	delH69V70,Y145del,N501Y,A570D,D614G,P681H,T716I,S982A,D1118H	TRUE
EPI_ISL_731478	2020-12-09	delH69V70,Y145del,N501Y,A570D,D614G,P681H,T716I,S982A,D1118H	TRUE
EPI_ISL_736293	2020-12-08	delH69V70,Y145del,N501Y,A570D,D614G,P681H,T716I,S982A,D1118H	TRUE
EPI_ISL_736298	2020-12-11	delH69V70,Y145del,N501Y,A570D,D614G,P681H,T716I,S982A,D1118H	TRUE
EPI_ISL_731474	2020-12-08	delH69V70,Y145del,N501Y,A570D,D614G,P681H,T716I,S982A,D1118H	TRUE
EPI_ISL_756715	2020-12-15	delH69V70,Y145del,N501Y,A570D,D614G,P681H,T716I,S982A,D1118H	TRUE
EPI_ISL_756721	2020-12-15	delH69V70,Y145del,N501Y,A570D,D614G,P681H,T716I,S982A,D1118H	TRUE
EPI_ISL_756719	2020-12-15	delH69V70,Y145del,N501Y,A570D,D614G,P681H,T716I,S982A,D1118H	TRUE
EPI_ISL_756717	2020-12-15	delH69V70,Y145del,N501Y,A570D,D614G,P681H,T716I,S982A,D1118H	TRUE
EPI_ISL_756714	2020-12-15	delH69V70,Y145del,N501Y,A570D,D614G,P681H,T716I,S982A,D1118H	TRUE
EPI_ISL_756718	2020-12-15	delH69V70,Y145del,N501Y,A570D,D614G,P681H,T716I,S982A,D1118H	TRUE
EPI_ISL_756724	2020-12-15	delH69V70,Y145del,N501Y,A570D,D614G,P681H,T716I,S982A,D1118H	TRUE
EPI_ISL_756723	2020-12-16	delH69V70,Y145del,N501Y,A570D,D614G,P681H,T716I,S982A,D1118H	TRUE
EPI_ISL_742109	2020-12-18	delH69V70,Y145del,N501Y,A570D,D614G,P681H,T716I,S982A,D1118H	TRUE
EPI_ISL_756722	2020-12-15	delH69V70,Y145del,N501Y,A570D,D614G,P681H,T716I,S982A,D1118H	TRUE
EPI_ISL_756772	2020-12-14	delH69V70,Y145del,N501Y,A570D,D614G,P681H,T716I,S982A,D1118H	TRUE
EPI_ISL_756774	2020-12-15	delH69V70,Y145del,N501Y,A570D,D614G,P681H,T716I,S982A,D1118H	TRUE
EPI_ISL_756773	2020-12-16	delH69V70,Y145del,N501Y,A570D,D614G,P681H,T716I,S982A,D1118H	TRUE
EPI_ISL_756769	2020-12-15	delH69V70,Y145del,N501Y,A570D,D614G,P681H,T716I,S982A,D1118H	TRUE
EPI_ISL_756771	2020-12-15	delH69V70,Y145del,N501Y,A570D,D614G,P681H,T716I,S982A,D1118H	TRUE
EPI_ISL_756783	2020-12-15	delH69V70,Y145del,N501Y,A570D,D614G,P681H,T716I,S982A,D1118H	TRUE
EPI_ISL_756720	2020-12-15	delH69V70,Y145del,N501Y,A570D,D614G,P681H,T716I,S982A,D1118H	TRUE
EPI_ISL_756779	2020-12-15	delH69V70,Y145del,N501Y,A570D,D614G,P681H,T716I,S982A,D1118H	TRUE
EPI_ISL_756775	2020-12-16	delH69V70,Y145del,N501Y,A570D,D614G,P681H,T716I,S982A,D1118H	TRUE
EPI_ISL_756777	2020-12-15	delH69V70,Y145del,N501Y,A570D,D614G,P681H,T716I,S982A,D1118H	TRUE
EPI_ISL_756782	2020-12-15	delH69V70,Y145del,N501Y,A570D,D614G,P681H,T716I,S982A,D1118H	TRUE
EPI_ISL_756781	2020-12-15	delH69V70,Y145del,N501Y,A570D,D614G,P681H,T716I,S982A,D1118H	TRUE
EPI_ISL_756776	2020-12-15	delH69V70,Y145del,N501Y,A570D,D614G,P681H,T716I,S982A,D1118H	TRUE
EPI_ISL_756794	2020-12-15	delH69V70,Y145del,N501Y,A570D,D614G,P681H,T716I,S982A,D1118H	TRUE
EPI_ISL_756780	2020-12-16	delH69V70,Y145del,N501Y,A570D,D614G,P681H,T716I,S982A,D1118H	TRUE
EPI_ISL_756784	2020-12-16	delH69V70,S71F,Y145del,N501Y,A570D,D614G,P681H,T716I,S982A,D1118H	TRUE
EPI_ISL_756785	2020-12-15	delH69V70,Y145del,N501Y,A570D,D614G,P681H,T716I,S982A,D1118H	TRUE
EPI_ISL_756795	2020-12-16	delH69V70,Y145del,N501Y,A570D,D614G,P681H,T716I,S982A,D1118H	TRUE
EPI_ISL_756797	2020-12-15	delH69V70,Y145del,N501Y,A570D,D614G,P681H,T716I,S982A,D1118H	TRUE
EPI_ISL_756788	2020-12-15	delH69V70,Y145del,N501Y,A570D,D614G,P681H,T716I,S982A,D1118H	TRUE
EPI_ISL_756796	2020-12-15	delH69V70,Y145del,N501Y,A570D,D614G,P681H,T716I,S982A,D1118H	TRUE
EPI_ISL_761237	2020-12-18	delH69V70,Y145del,N501Y,A570D,D614G,P681H,T716I,S982A,D1118H	TRUE
EPI_ISL_761249	2020-12-17	delH69V70,Y145del,N501Y,A570D,D614G,P681H,T716I,S982A,D1118H	TRUE
EPI_ISL_756789	2020-12-16	delH69V70,Y145del,N501Y,A570D,D614G,P681H,T716I,S982A,D1118H	TRUE
EPI_ISL_761251	2020-12-17	delH69V70,Y145del,N501Y,A570D,D614G,P681H,T716I,S982A,D1118H	TRUE
EPI_ISL_761254	2020-12-18	delH69V70,Y145del,N501Y,A570D,D614G,P681H,T716I,S982A,D1118H	TRUE
EPI_ISL_762566	2020-12-17	delH69V70,Y145del,N501Y,A570D,D614G,P681H,T716I,S982A,D1118H	TRUE
EPI_ISL_762577	2020-12-17	delH69V70,Y145del,N501Y,A570D,D614G,P681H,T716I,S982A,D1118H	TRUE
EPI_ISL_761267	2020-12-17	delH69V70,Y145del,W258C,N501Y,A570D,D614G,P681H,T716I,S982A,D1118H	TRUE
EPI_ISL_762582	2020-12-17	delH69V70,Y145del,N501Y,A570D,D614G,P681H,T716I,S982A,D1118H	TRUE
EPI_ISL_762567	2020-12-16	delH69V70,Y145del,L216F,N501Y,A570D,D614G,P681H,T716I,S982A,D1118H	TRUE
EPI_ISL_762578	2020-12-17	delH69V70,Y145del,N501Y,A570D,D614G,P681H,T716I,S982A,D1118H	TRUE
EPI_ISL_762568	2020-12-17	delH69V70,Y145del,N501Y,A570D,D614G,P681H,T716I,S982A,D1118H	TRUE
EPI_ISL_762570	2020-12-17	delH69V70,Y145del,N501Y,A570D,D614G,P681H,T716I,S982A,D1118H	TRUE
EPI_ISL_762574	2020-12-16	delH69V70,Y145del,N501Y,A570D,D614G,P681H,T716I,S982A,D1118H	TRUE
EPI_ISL_762573	2020-12-16	delH69V70,Y145del,N501Y,A570D,D614G,P681H,T716I,S982A,D1118H	TRUE
EPI_ISL_762576	2020-12-16	delH69V70,Y145del,N501Y,A570D,D614G,P681H,T716I,S982A,D1118H	TRUE
EPI_ISL_762569	2020-12-17	delH69V70,Y145del,N501Y,A570D,D614G,P681H,T716I,S982A,D1118H	TRUE
EPI_ISL_762583	2020-12-16	delH69V70,Y145del,N501Y,A570D,D614G,P681H,T716I,S982A,D1118H	TRUE
EPI_ISL_762579	2020-12-17	delH69V70,Y145del,N501Y,A570D,D614G,P681H,T716I,S982A,D1118H	TRUE
EPI_ISL_762575	2020-12-17	delH69V70,Y145del,N501Y,A570D,D614G,P681H,A706V,T716I,S982A,D1118H	TRUE
EPI_ISL_762587	2020-12-17	delH69V70,Y145del,N501Y,A570D,D614G,P681H,T716I,S982A,D1118H	TRUE
EPI_ISL_762585	2020-12-17	delH69V70,Y145del,N501Y,A570D,D614G,P681H,T716I,S982A,D1118H	TRUE
EPI_ISL_762581	2020-12-16	delH69V70,Y145del,N501Y,A570D,D614G,P681H,T716I,S982A,D1118H	TRUE
EPI_ISL_762588	2020-12-16	delH69V70,Y145del,N501Y,A570D,D614G,P681H,T716I,S982A,D1118H	TRUE
EPI_ISL_762593	2020-12-17	delH69V70,Y145del,N501Y,A570D,D614G,P681H,T716I,S982A,D1118H	TRUE
EPI_ISL_762589	2020-12-16	delH69V70,Y145del,N501Y,A570D,D614G,P681H,T716I,S982A,D1118H	TRUE
EPI_ISL_762592	2020-12-17	delH69V70,Y145del,N501Y,A570D,D614G,P681H,T716I,S982A,D1118H	TRUE
EPI_ISL_762594	2020-12-17	delH69V70,Y145del,N501Y,A570D,D614G,P681H,T716I,S982A,D1118H	TRUE
EPI_ISL_762590	2020-12-17	delH69V70,Y145del,N501Y,A570D,D614G,P681H,T716I,S982A,D1118H	TRUE
EPI_ISL_762591	2020-12-18	delH69V70,Y145del,N501Y,A570D,D614G,P681H,T716I,S982A,D1118H	TRUE
EPI_ISL_762595	2020-12-17	delH69V70,Y145del,N501Y,A570D,D614G,P681H,T716I,S982A,D1118H	TRUE
EPI_ISL_762597	2020-12-16	delH69V70,Y145del,N501Y,A570D,D614G,P681H,T716I,S982A,D1118H	TRUE
EPI_ISL_762596	2020-12-18	delH69V70,Y145del,N501Y,A570D,D614G,P681H,T716I,S982A,D1118H	TRUE
EPI_ISL_762584	2020-12-17	delH69V70,Y145del,N501Y,A570D,D614G,P681H,T716I,S982A,D1118H	TRUE
EPI_ISL_762598	2020-12-17	delH69V70,Y145del,N501Y,A570D,D614G,P681H,T716I,S982A,D1118H,D1146Y	TRUE
EPI_ISL_766116	2020-11-24	delH69V70,Y145del,N501Y,A570D,D614G,P681H,T716I,S982A,D1118H	TRUE
EPI_ISL_766117	2020-12-10	delH69V70,Y145del,N501Y,A570D,D614G,P681H,T716I,S982A,D1118H	TRUE
EPI_ISL_799877	2020-12-18	delH69V70,Y145del,N501Y,A570D,D614G,P681H,T716I,S982A,D1118H	TRUE
EPI_ISL_766104	2020-12-18	delH69V70,Y145del,N501Y,A570D,D614G,P681H,T716I,S982A,D1118H	TRUE
EPI_ISL_762599	2020-12-17	delH69V70,Y145del,N501Y,A570D,D614G,P681H,T716I,S982A,D1118H	TRUE
EPI_ISL_781715	2020-12-18	delH69V70,Y144del,R357K,N501Y,A570D,D614G,P681H,T716I,S982A,D1118H	TRUE
EPI_ISL_781741	2020-12-18	delH69V70,Y145del,N501Y,A570D,D614G,P681H,T716I,S982A,D1118H	TRUE
EPI_ISL_781716	2020-12-18	delH69V70,Y145del,N501Y,A570D,D614G,P681H,T716I,S982A,D1118H	TRUE
EPI_ISL_816909	2020-12-09	T20I,delH69V70,Y145del,N501Y,A570D,D614G,P681H,T716I,T719I,S982A,D1118H	TRUE
EPI_ISL_816900	2020-12-09	delH69V70,Y145del,N501Y,A570D,D614G,P681H,T716I,S982A,D1118H	TRUE
EPI_ISL_816913	2020-12-09	delH69V70,E96D,Y145del,N501Y,A570D,D614G,P681H,T716I,S982A,D1118H	TRUE
EPI_ISL_816905	2020-12-10	delH69V70,Y145del,N501Y,A570D,D614G,P681H,T716I,S982A,D1118H	TRUE
EPI_ISL_781728	2020-12-18	delH69V70,Y145del,N501Y,A570D,D614G,P681H,T716I,S982A,D1118H	TRUE
EPI_ISL_816907	2020-12-11	delH69V70,Y145del,N501Y,A570D,D614G,P681H,T716I,S982A,D1118H	TRUE
EPI_ISL_766115	2020-11-24	delH69V70,Y145del,N501Y,A570D,D614G,P681H,T716I,S982A,D1118H	TRUE
EPI_ISL_816901	2020-12-09	delH69V70,Y145del,N501Y,A570D,D614G,P681H,T716I,S982A,D1118H	TRUE
EPI_ISL_766118	2020-12-12	P26S,delH69V70,Y145del,N501Y,A570D,D614G,P681H,T716I,S982A,D1118H	TRUE
EPI_ISL_781729	2020-12-18	delH69V70,Y145del,N501Y,A570D,D614G,P681H,T716I,S982A,D1118H	TRUE
EPI_ISL_816916	2020-12-09	delH69V70,Y145del,N501Y,A570D,D614G,P681H,T716I,S982A,D1118H	TRUE
EPI_ISL_816919	2020-12-11	delH69V70,E96D,Y145del,N501Y,A570D,D614G,P681H,T716I,S982A,D1118H	TRUE
EPI_ISL_781712	2020-12-18	delH69V70,V143del,Y144F,N501Y,A570D,D614G,P681H,T716I,S982A,D1118H	TRUE
EPI_ISL_816912	2020-12-10	delH69V70,Y145del,N501Y,A570D,D614G,P681H,T716I,S982A,D1118H	TRUE
EPI_ISL_816921	2020-12-11	delH69V70,E96D,Y145del,N501Y,A570D,D614G,P681H,T716I,S982A,D1118H	TRUE
EPI_ISL_816917	2020-12-11	delH69V70,Y145del,N501Y,A570D,D614G,P681H,T716I,S982A,D1118H	TRUE
EPI_ISL_816923	2020-12-09	delH69V70,Y145del,N501Y,A570D,D614G,P681H,T716I,S982A,D1118H	TRUE
EPI_ISL_816914	2020-12-11	delH69V70,Y145del,N501Y,A570D,D614G,P681H,T716I,S982A,D1118H	TRUE
EPI_ISL_816924	2020-12-09	delH69V70,Y145del,N501Y,A570D,D614G,P681H,T716I,S982A,D1118H	TRUE
EPI_ISL_816920	2020-12-09	delH69V70,Y145del,N501Y,A570D,D614G,P681H,T716I,S982A,D1118H	TRUE
EPI_ISL_816925	2020-12-09	delH69V70,Y145del,N501Y,A570D,D614G,P681H,T716I,S982A,D1118H	TRUE
EPI_ISL_816931	2020-12-12	delH69V70,Y145del,N501Y,A570D,D614G,P681H,T716I,S982A,D1118H	TRUE
EPI_ISL_816934	2020-12-10	delH69V70,Y145del,N501Y,A570D,D614G,P681H,T716I,S982A,D1118H	TRUE
EPI_ISL_816940	2020-12-12	delH69V70,Y145del,N501Y,A570D,D614G,P681H,T716I,S982A,D1118H	TRUE
EPI_ISL_816938	2020-12-12	delH69V70,Y145del,N501Y,A570D,D614G,P681H,T716I,S982A,D1118H	TRUE
EPI_ISL_816941	2020-12-12	delH69V70,E96D,Y145del,N501Y,A570D,D614G,P681H,T716I,S982A,D1118H	TRUE
EPI_ISL_820129	2020-12-14	delH69V70,Y145del,N501Y,A570D,D614G,P681H,T716I,S982A,D1118H	TRUE
EPI_ISL_820135	2020-12-14	delH69V70,Y145del,N501Y,A570D,D614G,P681H,T716I,S982A,D1118H	TRUE
EPI_ISL_816932	2020-12-12	delH69V70,Y145del,N501Y,A570D,D614G,P681H,T716I,S982A,D1118H	TRUE
EPI_ISL_820150	2020-12-14	delH69V70,Y145del,N501Y,A570D,D614G,P681H,T716I,S982A,D1118H	TRUE
EPI_ISL_820140	2020-12-14	delH69V70,V143del,Y144F,N501Y,A570D,D614G,P681H,T716I,S982A,D1118H	TRUE
EPI_ISL_820139	2020-12-14	delH69V70,Y145del,N501Y,A570D,D614G,P681H,T716I,S982A,D1118H	TRUE
EPI_ISL_820147	2020-12-14	delH69V70,Y145del,N501Y,A570D,D614G,P681H,T716I,S982A,D1118H	TRUE
EPI_ISL_820132	2020-12-14	delH69V70,Y145del,N501Y,A570D,D614G,P681H,T716I,S982A,D1118H	TRUE
EPI_ISL_820145	2020-12-14	delH69V70,Y145del,N501Y,A570D,D614G,P681H,T716I,S982A,D1118H	TRUE
EPI_ISL_820155	2020-12-14	delH69V70,Y145del,N501Y,A570D,D614G,P681H,T716I,S982A,D1118H	TRUE
EPI_ISL_820158	2020-12-14	delH69V70,Y145del,N501Y,A570D,D614G,P681H,T716I,S982A,D1118H	TRUE
EPI_ISL_820157	2020-12-14	delH69V70,Y145del,N501Y,A570D,D614G,P681H,T716I,S982A,D1118H	TRUE
EPI_ISL_820137	2020-12-14	delH69V70,Y145del,N501Y,A570D,D614G,P681H,T716I,S982A,D1118H	TRUE
EPI_ISL_820171	2020-12-14	delH69V70,Y145del,N501Y,A570D,D614G,P681H,T716I,S982A,D1118H	TRUE
EPI_ISL_820152	2020-12-14	delH69V70,Y145del,N501Y,A570D,D614G,P681H,T716I,S982A,D1118H	TRUE
EPI_ISL_820148	2020-12-14	delH69V70,Y145del,N501Y,A570D,D614G,P681H,T716I,S982A,D1118H	TRUE
EPI_ISL_820170	2020-12-14	delH69V70,Y145del,N501Y,A570D,D614G,P681H,T716I,S982A,D1118H	TRUE
EPI_ISL_820173	2020-12-14	delH69V70,Y145del,N501Y,A570D,D614G,P681H,T716I,S982A,D1118H	TRUE
EPI_ISL_820165	2020-12-14	delH69V70,Y145del,T240I,N501Y,A570D,D614G,P681H,T716I,S982A,D1118H	TRUE
EPI_ISL_820184	2020-12-14	delH69V70,Y145del,N501Y,A570D,D614G,P681H,T716I,S982A,D1118H	TRUE
EPI_ISL_820176	2020-12-14	delH69V70,Y145del,N501Y,A570D,D614G,P681H,T716I,S982A,D1118H	TRUE
EPI_ISL_820189	2020-12-14	delH69V70,Y145del,R346G,N501Y,A570D,D614G,P681H,T716I,S982A,D1118H	TRUE
EPI_ISL_820181	2020-12-14	delH69V70,Y145del,N501Y,A570D,D614G,P681H,T716I,S982A,D1118H	TRUE
EPI_ISL_820179	2020-12-14	delH69V70,Y145del,N501Y,A570D,D614G,P681H,T716I,S982A,D1118H	TRUE
EPI_ISL_820177	2020-12-14	delH69V70,Y145del,N501Y,A570D,D614G,P681H,T716I,S982A,D1118H	TRUE
EPI_ISL_820166	2020-12-14	delH69V70,V143del,Y144F,N501Y,A570D,D614G,P681H,T716I,S982A,D1118H	TRUE
EPI_ISL_820174	2020-12-13	delH69V70,Y145del,S221L,N501Y,A570D,D614G,P681H,T716I,S982A,D1118H	TRUE
EPI_ISL_820187	2020-12-14	delH69V70,Y145del,N501Y,A570D,D614G,P681H,T716I,S982A,D1118H	TRUE
EPI_ISL_820198	2020-12-14	delH69V70,Y145del,N501Y,A570D,D614G,P681H,T716I,S982A,D1118H	TRUE
EPI_ISL_820195	2020-12-14	delH69V70,Y145del,N501Y,A570D,D614G,P681H,T716I,S982A,D1118H	TRUE
EPI_ISL_820197	2020-12-14	delH69V70,Y145del,N501Y,A570D,D614G,P681H,A706V,T716I,S982A,D1118H	TRUE
EPI_ISL_820192	2020-12-14	delH69V70,Y145del,N501Y,A570D,D614G,P681H,T716I,S982A,D1118H	TRUE
EPI_ISL_643815	2020-10-29	delH69V70,Y145del,N501Y,A570D,D614G,P681H,T716I,S982A,D1118H	TRUE
EPI_ISL_646085	2020-11-02	delH69V70,Y145del,A292S,N501Y,A570D,D614G,P681H,T716I,S982A,D1118H	TRUE
EPI_ISL_629559	2020-10-22	delH69V70,Y145del,N501Y,A570D,D614G,P681H,T716I,S982A,D1118H	TRUE
EPI_ISL_658054	2020-11-08	delH69V70,Y145del,N501Y,A570D,D614G,P681H,T716I,S982A,D1118H	TRUE
EPI_ISL_646065	2020-11-01	delH69V70,Y145del,N501Y,A570D,D614G,P681H,T716I,S982A,D1118H	TRUE
EPI_ISL_643805	2020-10-30	delH69V70,Y145del,N501Y,A570D,D614G,P681H,T716I,S982A,D1118H	TRUE
EPI_ISL_655782	2020-11-09	delH69V70,Y145del,N501Y,A570D,D614G,P681H,T716I,S982A,D1118H	TRUE
EPI_ISL_647399	2020-11-01	delH69V70,Y145del,N501Y,A570D,D614G,P681H,T716I,S982A,D1118H	TRUE
EPI_ISL_643836	2020-10-29	delH69V70,Y145del,N501Y,A570D,D614G,P681H,T716I,S982A,D1118H	TRUE
EPI_ISL_646089	2020-11-02	delH69V70,Y145del,N501Y,A570D,D614G,P681H,T716I,S982A,D1118H	TRUE
EPI_ISL_658072	2020-11-08	delH69V70,Y145del,N501Y,A570D,D614G,P681H,T716I,S982A,D1118H	TRUE
EPI_ISL_673681	2020-11-15	delH69V70,Y145del,N501Y,A570D,D614G,P681H,T716I,S982A,D1118H	TRUE
EPI_ISL_658098	2020-11-08	delH69V70,Y145del,N501Y,A570D,D614G,P681H,T716I,S982A,D1118H	TRUE
EPI_ISL_673692	2020-11-15	delH69V70,Y145del,N501Y,A570D,D614G,P681H,T716I,S982A,D1118H	TRUE
EPI_ISL_659373	2020-11-05	delH69V70,Y145del,N501Y,A570D,D614G,P681H,T716I,S982A,D1118H	TRUE
EPI_ISL_658077	2020-11-08	delH69V70,Y145del,N501Y,A570D,D614G,P681H,T716I,S982A,D1118H	TRUE
EPI_ISL_673676	2020-11-14	delH69V70,Y145del,N501Y,A570D,D614G,P681H,T716I,S982A,D1118H	TRUE
EPI_ISL_679761	2020-11-01	delH69V70,Y145del,N501Y,A570D,D614G,P681H,T716I,S982A,D1118H	TRUE
EPI_ISL_679748	2020-11-01	delH69V70,Y145del,N501Y,A570D,D614G,P681H,T716I,S982A,D1118H	TRUE
EPI_ISL_673691	2020-11-14	delH69V70,Y145del,N501Y,A570D,D614G,P681H,T716I,S982A,D1118H,E1207A	TRUE
EPI_ISL_661687	2020-11-11	delH69V70,Y145del,N501Y,A570D,D614G,P681H,T716I,S982A,D1118H	TRUE
EPI_ISL_679767	2020-11-02	delH69V70,Y145del,N501Y,A570D,D614G,P681H,T716I,S982A,D1118H	TRUE
EPI_ISL_679764	2020-11-01	delH69V70,Y145del,N501Y,A570D,D614G,P681H,T716I,S982A,D1118H	TRUE
EPI_ISL_702927	2020-11-19	delH69V70,Y145del,N501Y,A570D,D614G,P681H,T716I,S982A,D1118H	TRUE
EPI_ISL_679768	2020-11-01	delH69V70,Y145del,N501Y,A570D,D614G,P681H,T716I,S982A,D1118H	TRUE
EPI_ISL_701675	2020-11-19	delH69V70,Y145del,N501Y,A570D,A575S,D614G,P681H,A706V,T716I,S982A,D1118H	TRUE
EPI_ISL_679765	2020-11-01	delH69V70,Y145del,N501Y,A570D,D614G,P681H,T716I,S982A,D1118H	TRUE
EPI_ISL_701673	2020-11-20	delH69V70,Y145del,N501Y,A570D,D614G,P681H,T716I,S982A,D1118H	TRUE
EPI_ISL_679763	2020-11-01	delH69V70,Y145del,N501Y,A570D,D614G,P681H,T716I,S982A,D1118H	TRUE
EPI_ISL_702962	2020-11-20	delH69V70,Y145del,N501Y,A570D,D614G,P681H,T716I,S982A,D1118H	TRUE
EPI_ISL_702963	2020-11-19	delH69V70,Y145del,N501Y,A570D,D614G,P681H,T716I,S982A,D1118H	TRUE
EPI_ISL_705173	2020-11-22	delH69V70,Y145del,N501Y,A570D,D614G,P681H,T716I,S982A,D1118H	TRUE
EPI_ISL_702961	2020-12-04	delH69V70,Y145del,N501Y,A570D,D614G,P681H,T716I,S982A,D1118H	TRUE
EPI_ISL_705178	2020-11-22	delH69V70,Y145del,N501Y,A570D,D614G,P681H,T716I,S982A,D1118H	TRUE
EPI_ISL_702965	2020-11-19	delH69V70,Y145del,N501Y,A570D,D614G,P681H,T716I,S982A,D1118H	TRUE
EPI_ISL_718480	2020-12-10	delH69V70,Y145del,N501Y,A570D,D614G,P681H,T716I,S982A,D1118H	TRUE
EPI_ISL_718471	2020-12-10	delH69V70,Y145del,N501Y,A570D,D614G,P681H,T716I,S982A,D1118H	TRUE
EPI_ISL_718483	2020-12-10	delH69V70,Y145del,N501Y,A570D,D614G,P681H,T716I,S982A,D1118H	TRUE
EPI_ISL_718485	2020-12-10	delH69V70,Y145del,N501Y,A570D,D614G,P681H,T716I,S982A,D1118H	TRUE
EPI_ISL_718489	2020-12-10	delH69V70,Y145del,N501Y,A570D,D614G,P681H,T716I,S982A,D1118H	TRUE
EPI_ISL_718487	2020-12-10	delH69V70,Y145del,N501Y,A570D,D614G,P681H,T716I,S982A,D1118H	TRUE
EPI_ISL_718488	2020-12-10	delH69V70,Y145del,N501Y,A570D,D614G,P681H,A706V,T716I,S982A,D1118H	TRUE
EPI_ISL_702979	2020-11-19	delH69V70,Y145del,N501Y,A570D,D614G,P681H,T716I,S982A,D1118H	TRUE
EPI_ISL_718470	2020-12-10	delH69V70,S98F,Y145del,N501Y,A570D,D614G,P681H,T716I,S982A,D1118H	TRUE
EPI_ISL_723000	2020-12-10	delH69V70,Y145del,N501Y,A570D,D614G,P681H,T716I,S982A,D1118H	TRUE
EPI_ISL_718481	2020-12-10	delH69V70,Y145del,N501Y,A570D,D614G,P681H,T716I,S982A,D1118H	TRUE
EPI_ISL_723003	2020-12-09	delH69V70,Y145del,N501Y,A570D,D614G,P681H,T716I,S982A,D1118H	TRUE
EPI_ISL_723001	2020-12-09	delH69V70,Y145del,N501Y,A570D,D614G,P681H,T716I,S982A,D1118H	TRUE
EPI_ISL_723002	2020-12-09	delH69V70,Y145del,N501Y,A570D,D614G,P681H,T716I,S982A,D1118H	TRUE
EPI_ISL_723004	2020-12-09	delH69V70,Y145del,N501Y,A570D,D614G,P681H,T716I,S982A,D1118H	TRUE
EPI_ISL_723006	2020-12-11	delH69V70,Y145del,N501Y,A570D,D614G,P681H,T716I,S982A,D1118H	TRUE
EPI_ISL_725628	2020-12-08	delH69V70,Y145del,N501Y,A570D,D614G,P681H,T716I,S982A,D1118H	TRUE
EPI_ISL_723005	2020-12-09	delH69V70,Y145del,N501Y,A570D,D614G,P681H,T716I,S982A,D1118H	TRUE
EPI_ISL_731436	2020-12-09	delH69V70,Y145del,N501Y,A570D,D614G,P681H,T716I,S982A,D1118H	TRUE
EPI_ISL_723007	2020-12-12	delH69V70,Y145del,N501Y,A570D,D614G,P681H,T716I,S982A,D1118H	TRUE
EPI_ISL_731490	2020-12-09	delH69V70,Y145del,N501Y,A570D,D614G,P681H,T716I,S982A,D1118H	TRUE
EPI_ISL_731494	2020-12-11	delH69V70,Y145del,N501Y,A570D,D614G,P681H,T716I,S982A,D1118H	TRUE
EPI_ISL_731492	2020-12-09	delH69V70,Y145del,N501Y,A570D,D614G,P681H,T716I,S982A,D1118H	TRUE
EPI_ISL_731445	2020-12-09	delH69V70,Y145del,N501Y,A570D,D614G,P681H,T716I,S982A,D1118H	TRUE
EPI_ISL_756726	2020-12-15	delH69V70,Y145del,N501Y,A570D,D614G,P681H,T716I,S982A,D1118H	TRUE
EPI_ISL_731437	2020-12-10	delH69V70,Y145del,N501Y,A570D,D614G,P681H,T716I,S982A,D1118H	TRUE
EPI_ISL_731438	2020-12-09	delH69V70,Y145del,N501Y,A570D,D614G,P681H,T716I,S982A,D1118H	TRUE
EPI_ISL_731497	2020-12-10	delH69V70,Y145del,N501Y,A570D,D614G,P681H,T716I,S982A,D1118H	TRUE
EPI_ISL_756727	2020-12-15	delH69V70,Y145del,S494P,N501Y,A570D,D614G,P681H,T716I,S982A,D1118H	TRUE
EPI_ISL_756735	2020-12-15	delH69V70,Y145del,N501Y,A570D,D614G,P681H,T716I,S982A,D1118H	TRUE
EPI_ISL_756729	2020-12-16	delH69V70,Y145del,N501Y,A570D,D614G,P681H,T716I,S982A,D1118H	TRUE
EPI_ISL_756728	2020-12-15	delH69V70,Y145del,N501Y,A570D,D614G,P681H,T716I,S982A,D1118H	TRUE
EPI_ISL_756731	2020-12-15	delH69V70,Y145del,N501Y,A570D,D614G,P681H,T716I,S982A,D1118H	TRUE
EPI_ISL_756739	2020-12-15	delH69V70,Y145del,N501Y,A570D,D614G,P681H,T716I,S982A,D1118H	TRUE
EPI_ISL_756738	2020-12-15	delH69V70,Y145del,N501Y,A570D,D614G,P681H,T716I,S982A,D1118H	TRUE
EPI_ISL_756733	2020-12-15	delH69V70,Y145del,N501Y,A570D,D614G,P681H,T716I,S982A,D1118H	TRUE
EPI_ISL_756742	2020-12-15	delH69V70,Y145del,N501Y,A570D,D614G,P681H,T716I,S982A,D1118H	TRUE
EPI_ISL_756743	2020-12-15	delH69V70,Y145del,P209L,N501Y,A570D,D614G,P681H,T716I,S982A,D1118H	TRUE
EPI_ISL_756740	2020-12-15	delH69V70,Y145del,N501Y,A570D,D614G,P681H,T716I,S982A,D1118H	TRUE
EPI_ISL_756749	2020-12-15	delH69V70,Y145del,N501Y,A570D,D614G,P681H,T716I,S982A,D1118H	TRUE
EPI_ISL_756744	2020-12-16	delH69V70,Y145del,N501Y,A570D,D614G,P681H,T716I,S982A,D1118H	TRUE
EPI_ISL_756751	2020-12-15	delH69V70,Y145del,N501Y,A570D,D614G,P681H,T716I,S982A,D1118H	TRUE
EPI_ISL_756745	2020-12-16	delH69V70,Y145del,N501Y,A570D,D614G,P681H,T716I,S982A,D1118H	TRUE
EPI_ISL_756746	2020-12-15	delH69V70,Y145del,N501Y,A570D,D614G,P681H,T716I,S982A,D1118H	TRUE
EPI_ISL_756734	2020-12-15	delH69V70,Y145del,N501Y,A570D,D614G,P681H,T716I,S982A,D1118H	TRUE
EPI_ISL_756732	2020-12-15	delH69V70,Y145del,N501Y,A570D,D614G,P681H,T716I,S982A,D1118H	TRUE
EPI_ISL_756753	2020-12-14	delH69V70,Y145del,N501Y,A570D,D614G,P681H,T716I,S982A,D1118H	TRUE
EPI_ISL_756755	2020-12-15	delH69V70,Y145del,N501Y,A570D,D614G,P681H,T716I,S982A,D1118H	TRUE
EPI_ISL_756752	2020-12-15	delH69V70,Y145del,N501Y,A570D,D614G,P681H,T716I,S982A,D1118H	TRUE
EPI_ISL_756758	2020-12-15	delH69V70,Y145del,N501Y,A570D,D614G,P681H,T716I,S982A,D1118H	TRUE
EPI_ISL_756760	2020-12-15	delH69V70,Y145del,N501Y,A570D,D614G,P681H,T716I,S982A,D1118H	TRUE
EPI_ISL_756759	2020-12-15	delH69V70,Y145del,N501Y,A570D,D614G,P681H,T716I,S982A,D1118H	TRUE
EPI_ISL_756756	2020-12-15	delH69V70,Y145del,N501Y,A570D,D614G,P681H,T716I,S982A,D1118H	TRUE
EPI_ISL_756754	2020-12-15	delH69V70,Y145del,N501Y,A570D,D614G,P681H,T716I,S982A,D1118H	TRUE
EPI_ISL_756763	2020-12-15	delH69V70,Y145del,N501Y,A570D,D614G,P681H,T716I,S982A,D1118H	TRUE
EPI_ISL_756764	2020-12-15	delH69V70,Y145del,N501Y,A570D,D614G,P681H,T716I,S982A,D1118H	TRUE
EPI_ISL_756793	2020-12-15	delH69V70,Y145del,N501Y,A570D,D614G,P681H,T716I,S982A,D1118H	TRUE
EPI_ISL_756790	2020-12-15	delH69V70,Y145del,N501Y,A570D,D614G,P681H,T716I,S982A,D1118H	TRUE
EPI_ISL_756767	2020-12-15	delH69V70,Y145del,N501Y,A570D,D614G,P681H,T716I,S982A,D1118H	TRUE
EPI_ISL_756792	2020-12-15	T22I,delH69V70,Y145del,N501Y,A570D,D614G,P681H,T716I,S982A,D1118H	TRUE
EPI_ISL_756768	2020-12-15	delH69V70,Y145del,N501Y,A570D,D614G,P681H,T716I,S982A,D1118H	TRUE
EPI_ISL_763908	2020-12-16	delH69V70,Y145del,N501Y,A570D,D614G,T678I,P681H,T716I,S982A,D1118H	TRUE
EPI_ISL_763907	2020-12-12	delH69V70,Y145del,N501Y,A570D,D614G,P681H,T716I,S982A,D1118H	TRUE
EPI_ISL_756766	2020-12-15	delH69V70,Y145del,N501Y,A570D,D614G,P681H,T716I,S982A,D1118H	TRUE
EPI_ISL_763913	2020-12-18	delH69V70,Y145del,N501Y,A570D,D614G,P681H,T716I,S982A,D1118H	TRUE
EPI_ISL_763914	2020-12-18	delH69V70,Y145del,N501Y,A570D,D614G,P681H,T716I,S982A,D1118H	TRUE
EPI_ISL_763912	2020-12-18	delH69V70,Y145del,N501Y,A570D,D614G,P681H,T716I,S982A,D1118H	TRUE
EPI_ISL_763909	2020-12-16	delH69V70,Y145del,N501Y,A570D,D614G,P681H,T716I,S982A,D1118H	TRUE
EPI_ISL_763910	2020-12-16	delH69V70,Y145del,N501Y,A570D,D614G,P681H,T716I,S982A,D1118H	TRUE
EPI_ISL_763916	2020-12-18	delH69V70,Y145del,N501Y,A570D,D614G,P681H,T716I,S982A,D1118H	TRUE
EPI_ISL_763919	2020-12-18	delH69V70,Y145del,N501Y,A570D,D614G,P681H,T716I,S982A,D1118H	TRUE
EPI_ISL_763918	2020-12-18	delH69V70,Y145del,N501Y,A570D,D614G,P681H,T716I,S982A,D1118H	TRUE
EPI_ISL_766120	2020-12-12	delH69V70,Y145del,N501Y,A570D,D614G,P681H,T716I,S982A,D1118H	TRUE
EPI_ISL_763928	2020-12-15	delH69V70,Y145del,N501Y,A570D,D614G,P681H,T716I,S982A,D1118H	TRUE
EPI_ISL_763921	2020-12-18	delH69V70,Y145del,N501Y,A570D,D614G,P681H,T716I,S982A,D1118H	TRUE
EPI_ISL_763923	2020-12-18	delH69V70,Y145del,S494P,N501Y,A570D,D614G,P681H,T716I,S982A,D1118H	TRUE
EPI_ISL_763920	2020-12-18	delH69V70,Y145del,N501Y,A570D,D614G,P681H,T716I,S982A,D1118H	TRUE
EPI_ISL_763915	2020-12-18	delH69V70,Y145del,S494P,N501Y,A570D,D614G,P681H,T716I,S982A,D1118H	TRUE
EPI_ISL_766121	2020-12-14	delH69V70,Y145del,N501Y,A570D,D614G,P681H,T716I,S982A,D1118H	TRUE
EPI_ISL_763922	2020-12-18	delH69V70,Y145del,N501Y,A570D,D614G,P681H,T716I,S982A,D1118H	TRUE
EPI_ISL_763929	2020-12-15	delH69V70,Y145del,N501Y,A570D,D614G,P681H,T716I,A892V,S982A,D1118H	TRUE
EPI_ISL_766119	2020-12-11	delH69V70,Y145del,N501Y,A570D,D614G,P681H,T716I,S982A,D1118H,V1230L	TRUE
EPI_ISL_766124	2020-12-06	delH69V70,Y145del,N501Y,A570D,D614G,P681H,T716I,S982A,D1118H	TRUE
EPI_ISL_766125	2020-12-07	delH69V70,Y145del,N501Y,A570D,D614G,P681H,T716I,S982A,D1118H	TRUE
EPI_ISL_766123	2020-12-04	delH69V70,Y145del,N501Y,A570D,D614G,P681H,T716I,S982A,D1118H,V1228L	TRUE
EPI_ISL_766139	2020-12-14	delH69V70,Y145del,N501Y,A570D,D614G,P681H,T716I,S982A,D1118H	TRUE
EPI_ISL_766127	2020-12-10	delH69V70,Y145del,N501Y,A570D,D614G,P681H,T716I,S982A,D1118H	TRUE
EPI_ISL_766130	2020-12-09	delH69V70,Y145del,N501Y,A570D,D614G,P681H,T716I,S982A,D1118H	TRUE
EPI_ISL_766128	2020-12-11	delH69V70,Y145del,N501Y,A570D,D614G,P681H,T716I,S982A,D1118H	TRUE
EPI_ISL_766126	2020-12-05	delH69V70,Y145del,N501Y,A570D,D614G,P681H,T716I,S982A,A1020V,D1118H	TRUE
EPI_ISL_766138	2020-12-14	delH69V70,Y145del,N501Y,A570D,D614G,P681H,T716I,S982A,D1118H	TRUE
EPI_ISL_766132	2020-12-14	delH69V70,Y145del,N501Y,A570D,D614G,P681H,T716I,S982A,D1118H	TRUE
EPI_ISL_766129	2020-12-09	delH69V70,Y145del,N501Y,A570D,D614G,P681H,T716I,S982A,D1118H	TRUE
EPI_ISL_766133	2020-12-12	delH69V70,Y145del,N501Y,A570D,D614G,P681H,T716I,S982A,D1118H	TRUE
EPI_ISL_766137	2020-12-14	delH69V70,Y145del,N501Y,A570D,D614G,P681H,T716I,S982A,D1118H	TRUE
EPI_ISL_766131	2020-12-10	delH69V70,Y145del,N501Y,A570D,D614G,P681H,T716I,S982A,D1118H	TRUE
EPI_ISL_766134	2020-12-10	delH69V70,Y145del,S221L,N501Y,A570D,D614G,P681H,T716I,S982A,D1118H	TRUE
EPI_ISL_766170	2020-12-17	delH69V70,Y145del,N501Y,A570D,D614G,P681H,T716I,S982A,D1118H	TRUE
EPI_ISL_766136	2020-12-14	delH69V70,Y145del,N501Y,A570D,D614G,P681H,T716I,S982A,D1118H	TRUE
EPI_ISL_766135	2020-12-14	delH69V70,Y145del,N501Y,A570D,D614G,P681H,T716I,S982A,D1118H	TRUE
EPI_ISL_766171	2020-12-16	delH69V70,Y145del,N501Y,A570D,D614G,P681H,T716I,S982A,D1118H	TRUE
EPI_ISL_766174	2020-12-16	delH69V70,Y145del,N501Y,A570D,D614G,P681H,T716I,S982A,D1118H	TRUE
EPI_ISL_766172	2020-12-16	delH69V70,Y145del,N501Y,A570D,D614G,P681H,T716I,S982A,D1118H	TRUE
EPI_ISL_766173	2020-12-16	delH69V70,Y145del,N501Y,A570D,D614G,P681H,T716I,S982A,D1118H	TRUE
EPI_ISL_766175	2020-12-16	delH69V70,Y145del,N501Y,A570D,D614G,P681H,T716I,S982A,D1118H	TRUE
EPI_ISL_766182	2020-12-17	L18F,delH69V70,Y145del,N501Y,A570D,D614G,P681H,T716I,S982A,D1118H	TRUE
EPI_ISL_766176	2020-12-16	delH69V70,Y145del,N501Y,A570D,D614G,P681H,T716I,S982A,D1118H	TRUE
EPI_ISL_766177	2020-12-16	delH69V70,Y145del,N501Y,A570D,D614G,P681H,T716I,S982A,D1118H	TRUE
EPI_ISL_766180	2020-12-17	delH69V70,Y145del,N501Y,A570D,D614G,P681H,T716I,S982A,D1118H	TRUE
EPI_ISL_766178	2020-12-17	delH69V70,Y145del,N501Y,A570D,D614G,P681H,T716I,S982A,D1118H	TRUE
EPI_ISL_766187	2020-12-16	L18F,delH69V70,Y145del,N501Y,A570D,D614G,P681H,T716I,S982A,D1118H	TRUE
EPI_ISL_766185	2020-12-17	L18F,delH69V70,Y145del,N501Y,A570D,D614G,P681H,T716I,S982A,D1118H	TRUE
EPI_ISL_766179	2020-12-17	L18F,delH69V70,Y145del,N501Y,A570D,D614G,P681H,T716I,S982A,D1118H	TRUE
EPI_ISL_766181	2020-12-17	delH69V70,Y145del,N501Y,A570D,D614G,P681H,T716I,S982A,D1118H	TRUE
EPI_ISL_766184	2020-12-17	delH69V70,Y145del,N501Y,A570D,D614G,P681H,T716I,S982A,D1118H	TRUE
EPI_ISL_766188	2020-12-18	delH69V70,Y145del,N501Y,A570D,D614G,P681H,T716I,S982A,D1118H	TRUE
EPI_ISL_766183	2020-12-17	delH69V70,Y145del,N501Y,A570D,D614G,P681H,T716I,S982A,D1118H	TRUE
EPI_ISL_766186	2020-12-16	delH69V70,Y145del,N501Y,A570D,D614G,P681H,T716I,S982A,D1118H	TRUE
EPI_ISL_766190	2020-12-16	delH69V70,Y145del,N501Y,A570D,D614G,P681H,T716I,S982A,D1118H	TRUE
EPI_ISL_766189	2020-12-17	delH69V70,Y145del,N501Y,A570D,D614G,P681H,T716I,S982A,D1118H	TRUE
EPI_ISL_766192	2020-12-18	delH69V70,Y145del,L216F,N501Y,A570D,D614G,P681H,T716I,S982A,D1118H	TRUE
EPI_ISL_766195	2020-12-18	delH69V70,Y145del,N501Y,A570D,D614G,P681H,T716I,S982A,D1118H	TRUE
EPI_ISL_766191	2020-12-18	delH69V70,Y145del,N501Y,A570D,D614G,P681H,T716I,S982A,D1118H	TRUE
EPI_ISL_766193	2020-12-17	delH69V70,Y145del,N501Y,A570D,D614G,P681H,T716I,S982A,D1118H	TRUE
EPI_ISL_778175	2020-12-18	delH69V70,Y145del,N501Y,A570D,D614G,P681H,T716I,S982A,D1118H	TRUE
EPI_ISL_778105	2020-12-18	delH69V70,Y145del,N501Y,A570D,D614G,P681H,T716I,S982A,D1118H	TRUE
EPI_ISL_778173	2020-12-18	delH69V70,Y145del,N501Y,A570D,D614G,P681H,T716I,S982A,D1118H	TRUE
EPI_ISL_778172	2020-12-18	delH69V70,Y145del,N501Y,A570D,D614G,P681H,T716I,S982A,D1118H	TRUE
EPI_ISL_778177	2020-12-18	delH69V70,Y145del,N501Y,A570D,D614G,P681H,T716I,S982A,D1118H	TRUE
EPI_ISL_778182	2020-12-18	delH69V70,Y145del,N501Y,A570D,D614G,P681H,T716I,S982A,D1118H	TRUE
EPI_ISL_778169	2020-12-18	delH69V70,Y145del,N501Y,A570D,D614G,P681H,T716I,S982A,D1118H	TRUE
EPI_ISL_778152	2020-12-18	S46L,delH69V70,Y145del,N501Y,A570D,D614G,P681H,T716I,S982A,D1118H	TRUE
EPI_ISL_781707	2020-12-18	delH69V70,Y145del,N501Y,A570D,D614G,P681H,T716I,S982A,D1118H	TRUE
EPI_ISL_778178	2020-12-18	delH69V70,Y145del,N501Y,A570D,D614G,P681H,T716I,S982A,D1118H	TRUE
EPI_ISL_778103	2020-12-18	delH69V70,Y145del,N501Y,A570D,D614G,P681H,T716I,S982A,D1118H	TRUE
EPI_ISL_781703	2020-12-18	delH69V70,Y145del,S494P,N501Y,A570D,D614G,P681H,T716I,S982A,D1118H	TRUE
EPI_ISL_781706	2020-12-18	delH69V70,Y145del,N501Y,A570D,D614G,P681H,T716I,S982A,D1118H	TRUE
EPI_ISL_781745	2020-12-18	delH69V70,Y145del,N501Y,A570D,D614G,P681H,T716I,S982A,D1118H	TRUE
EPI_ISL_781734	2020-12-18	delH69V70,Y145del,N501Y,A570D,D614G,P681H,T716I,S982A,D1118H	TRUE
EPI_ISL_781736	2020-12-18	delH69V70,Y145del,S494P,N501Y,A570D,D614G,P681H,T716I,S982A,D1118H	TRUE
EPI_ISL_781794	2020-12-18	delH69V70,Y145del,N501Y,A570D,D614G,P681H,T716I,S982A,D1118H	TRUE
EPI_ISL_778188	2020-12-18	delH69V70,Y145del,N501Y,A570D,D614G,P681H,T716I,S982A,D1118H	TRUE
EPI_ISL_781771	2020-12-18	delH69V70,Y145del,N501Y,A570D,D614G,P681H,T716I,S982A,D1118H	TRUE
EPI_ISL_801002	2020-11-19	delH69V70,Y145del,N501Y,A570D,D614G,P681H,T716I,S982A,D1118H	TRUE
EPI_ISL_781797	2020-12-18	delH69V70,Y145del,N501Y,A570D,D614G,P681H,T716I,S982A,D1118H	TRUE
EPI_ISL_801011	2020-11-23	delH69V70,Y145del,N501Y,A570D,D614G,P681H,T716I,S982A,D1118H	TRUE
EPI_ISL_801013	2020-11-22	delH69V70,Y145del,N501Y,A570D,D614G,P681H,T716I,S982A,D1118H	TRUE
EPI_ISL_801018	2020-11-22	delH69V70,Y145del,N501Y,A570D,D614G,P681H,T716I,S982A,D1118H	TRUE
EPI_ISL_801001	2020-11-22	delH69V70,Y145del,N501Y,A570D,D614G,P681H,T716I,S982A,D1118H	TRUE
EPI_ISL_801021	2020-11-22	A570D,D614G,S982A,D1118H	TRUE
EPI_ISL_801007	2020-11-22	delH69V70,Y145del,N501Y,A570D,D614G,P681H,T716I,S982A,D1118H	TRUE
EPI_ISL_801006	2020-11-23	delH69V70,Y145del,N501Y,A570D,D614G,P681H,T716I,S982A,D1118H	TRUE
EPI_ISL_801017	2020-11-22	delH69V70,Y145del,N501Y,A570D,D614G,P681H,T716I,S982A,D1118H	TRUE
EPI_ISL_801010	2020-11-22	delH69V70,Y145del,N501Y,A570D,D614G,P681H,T716I,S982A,D1118H	TRUE
EPI_ISL_816883	2020-12-07	delH69V70,Y145del,N501Y,A570D,D614G,P681H,T716I,S982A,D1118H	TRUE
EPI_ISL_816896	2020-12-10	delH69V70,Y145del,N501Y,A570D,D614G,P681H,T716I,S982A,D1118H	TRUE
EPI_ISL_816882	2020-12-08	delH69V70,Y145del,N501Y,A570D,D614G,P681H,T716I,S982A,D1118H	TRUE
EPI_ISL_816887	2020-12-08	delH69V70,Y145del,N501Y,A570D,D614G,P681H,T716I,S982A,D1118H	TRUE
EPI_ISL_801028	2020-11-22	delH69V70,Y145del,N501Y,A570D,D614G,P681H,T716I,S982A,D1118H	TRUE
EPI_ISL_816886	2020-12-08	delH69V70,Y145del,N501Y,A570D,D614G,P681H,T716I,S982A,D1118H	TRUE
EPI_ISL_816943	2020-12-10	delH69V70,Y145del,N501Y,A570D,D614G,P681H,T716I,S982A,D1118H	TRUE
EPI_ISL_816942	2020-12-10	delH69V70,Y145del,N501Y,A570D,D614G,P681H,T716I,S982A,D1118H	TRUE
EPI_ISL_816889	2020-12-08	L18F,delH69V70,Y145del,N501Y,A570D,D614G,P681H,T716I,S982A,D1118H	TRUE
EPI_ISL_816948	2020-12-12	delH69V70,Y145del,N501Y,A570D,D614G,P681H,T716I,S982A,D1118H	TRUE
EPI_ISL_816947	2020-12-10	delH69V70,Y145del,N501Y,A570D,D614G,P681H,T716I,S982A,D1118H	TRUE
EPI_ISL_816899	2020-12-11	delH69V70,Y145del,N501Y,A570D,D614G,P681H,T716I,S982A,D1118H	TRUE
EPI_ISL_816954	2020-12-10	delH69V70,S98F,Y145del,N501Y,A570D,D614G,P681H,T716I,S982A,D1118H	TRUE
EPI_ISL_816946	2020-12-12	delH69V70,Y145del,N501Y,A570D,D614G,P681H,T716I,S982A,D1118H	TRUE
EPI_ISL_816951	2020-12-12	delH69V70,Y145del,N501Y,A570D,D614G,P681H,T716I,S982A,D1118H	TRUE
EPI_ISL_816949	2020-12-12	delH69V70,Y145del,N501Y,A570D,D614G,P681H,T716I,S982A,D1118H	TRUE
EPI_ISL_816963	2020-12-10	delH69V70,Y145del,N501Y,A570D,D614G,P681H,T716I,S982A,D1118H	TRUE
EPI_ISL_816952	2020-12-12	delH69V70,Y145del,N501Y,A570D,D614G,P681H,T716I,S982A,D1118H	TRUE
EPI_ISL_816972	2020-12-10	delH69V70,Y145del,N501Y,A570D,D614G,P681H,T716I,S982A,D1118H	TRUE
EPI_ISL_816966	2020-12-11	delH69V70,Y145del,N501Y,A570D,D614G,P681H,T716I,S982A,D1118H	TRUE
EPI_ISL_816950	2020-12-12	delH69V70,Y145del,N501Y,A570D,D614G,P681H,T716I,S982A,D1118H	TRUE
EPI_ISL_816968	2020-12-09	delH69V70,Y145del,N501Y,A570D,D614G,P681H,T716I,S982A,D1118H	TRUE
EPI_ISL_816976	2020-12-09	T20I,delH69V70,Y145del,N501Y,A570D,D614G,P681H,T716I,T719I,S982A,D1118H	TRUE
EPI_ISL_816955	2020-12-12	delH69V70,E96D,Y145del,N501Y,A570D,D614G,P681H,T716I,S982A,D1118H	TRUE
EPI_ISL_816979	2020-12-10	delH69V70,Y145del,N501Y,A570D,D614G,P681H,T716I,S982A,D1118H	TRUE
EPI_ISL_816974	2020-12-11	delH69V70,Y145del,N501Y,A570D,D614G,P681H,T716I,S982A,D1118H	TRUE
EPI_ISL_816967	2020-12-09	delH69V70,Y145del,N501Y,A570D,D614G,P681H,T716I,S982A,D1118H	TRUE
EPI_ISL_816981	2020-12-11	delH69V70,Y145del,N501Y,A570D,D614G,P681H,T716I,S982A,D1118H	TRUE
EPI_ISL_816983	2020-12-09	delH69V70,Y145del,N501Y,A570D,D614G,P681H,T716I,S982A,D1118H	TRUE
EPI_ISL_816980	2020-12-09	delH69V70,E96D,Y145del,N501Y,A570D,D614G,P681H,T716I,S982A,D1118H	TRUE
EPI_ISL_816987	2020-12-09	delH69V70,Y145del,N501Y,A570D,D614G,P681H,T716I,S982A,D1118H	TRUE
EPI_ISL_816998	2020-12-12	delH69V70,Y145del,N501Y,A570D,D614G,P681H,T716I,S982A,D1118H	TRUE
EPI_ISL_816986	2020-12-11	delH69V70,E96D,Y145del,N501Y,A570D,D614G,P681H,T716I,S982A,D1118H	TRUE
EPI_ISL_816988	2020-12-11	delH69V70,E96D,Y145del,N501Y,A570D,D614G,P681H,T716I,S982A,D1118H	TRUE
EPI_ISL_816984	2020-12-11	delH69V70,Y145del,N501Y,A570D,D614G,P681H,T716I,S982A,D1118H	TRUE
EPI_ISL_816991	2020-12-09	delH69V70,Y145del,N501Y,A570D,D614G,P681H,T716I,S982A,D1118H	TRUE
EPI_ISL_816990	2020-12-09	delH69V70,Y145del,N501Y,A570D,D614G,P681H,T716I,S982A,D1118H	TRUE
EPI_ISL_839525	2020-12-09	delH69V70,Y145del,N501Y,A570D,D614G,P681H,T716I,S982A,D1118H	TRUE
EPI_ISL_839526	2020-12-08	delH69V70,Y145del,N501Y,A570D,D614G,P681H,T716I,S982A,D1118H	TRUE
EPI_ISL_841821	2020-12-15	delH69V70,Y145del,N501Y,A570D,D614G,P681H,T716I,S982A,D1118H	TRUE
EPI_ISL_816992	2020-12-09	delH69V70,Y145del,N501Y,A570D,D614G,P681H,T716I,S982A,D1118H	TRUE
EPI_ISL_841829	2020-12-15	delH69V70,Y145del,N501Y,A570D,D614G,P681H,T716I,S982A,D1118H	TRUE
EPI_ISL_839523	2020-12-09	delH69V70,Y145del,N501Y,A570D,D614G,P681H,T716I,S982A,D1118H	TRUE
EPI_ISL_816999	2020-12-12	delH69V70,Y145del,N501Y,A570D,D614G,P681H,T716I,S982A,D1118H	TRUE
EPI_ISL_841824	2020-12-15	delH69V70,Y145del,N501Y,A570D,E583D,D614G,P681H,T716I,S982A,D1118H	TRUE
EPI_ISL_841828	2020-12-15	delH69V70,Y145del,N501Y,A570D,D614G,P681H,T716I,S982A,D1118H	TRUE
EPI_ISL_841823	2020-12-15	delH69V70,Y145del,N501Y,A570D,D614G,P681H,T716I,S982A,D1118H	TRUE
EPI_ISL_839548	2020-12-14	delH69V70,Y145del,N501Y,A570D,D614G,P681H,T716I,S982A,D1118H	TRUE
EPI_ISL_841826	2020-12-15	delH69V70,Y145del,N501Y,A570D,D614G,P681H,T716I,S982A,D1118H	TRUE
EPI_ISL_841831	2020-12-17	delH69V70,Y145del,N501Y,A570D,D614G,P681H,T716I,S982A,D1118H	TRUE
EPI_ISL_841837	2020-12-17	delH69V70,Y145del,N501Y,A570D,D614G,P681H,T716I,S982A,D1118H	TRUE
EPI_ISL_841841	2020-12-17	delH69V70,Y145del,N501Y,A570D,D614G,P681H,T716I,S982A,D1118H	TRUE
EPI_ISL_841832	2020-12-17	delH69V70,Y145del,N501Y,A570D,D614G,P681H,T716I,S982A,D1118H	TRUE
EPI_ISL_841843	2020-12-17	delH69V70,Y145del,N501Y,A570D,D614G,P681H,T716I,S982A,D1118H	TRUE
EPI_ISL_841862	2020-12-17	delH69V70,Y145del,N501Y,A570D,D614G,P681H,T716I,S982A,D1118H	TRUE
EPI_ISL_841833	2020-12-17	delH69V70,Y145del,N501Y,A570D,D614G,P681H,T716I,S982A,D1118H	TRUE
EPI_ISL_841860	2020-12-17	delH69V70,Y145del,N501Y,A570D,D614G,P681H,T716I,S982A,A1020V,D1118H	TRUE
EPI_ISL_841857	2020-12-17	delH69V70,Y145del,N501Y,A570D,D614G,P681H,T716I,S982A,D1118H	TRUE
EPI_ISL_841858	2020-12-17	delH69V70,Y145del,N501Y,A570D,D614G,P681H,T716I,S982A,D1118H,C1243F	TRUE
EPI_ISL_629466	2020-10-21	delH69V70,Y145del,N501Y,A570D,D614G,P681H,T716I,S982A,D1118H	TRUE
EPI_ISL_841856	2020-12-17	delH69V70,Y145del,N501Y,A570D,D614G,P681H,T716I,S982A,D1118H	TRUE
EPI_ISL_841854	2020-12-15	delH69V70,Y145del,N501Y,A570D,D614G,P681H,T716I,S982A,D1118H	TRUE
EPI_ISL_841840	2020-12-17	delH69V70,Y145del,N501Y,A570D,D614G,P681H,T716I,S982A,D1118H	TRUE
EPI_ISL_643749	2020-10-31	delH69V70,Y145del,N501Y,A570D,D614G,P681H,T716I,S982A,D1118H	TRUE
EPI_ISL_655762	2020-11-10	delH69V70,Y145del,N501Y,A570D,D614G,P681H,T716I,S982A,D1118H	TRUE
EPI_ISL_655766	2020-11-09	delH69V70,Y145del,N501Y,A570D,D614G,P681H,T716I,S982A,D1118H	TRUE
EPI_ISL_643752	2020-10-30	delH69V70,Y145del,N501Y,A570D,D614G,P681H,T716I,S982A,D1118H	TRUE
EPI_ISL_679774	2020-11-02	delH69V70,Y145del,N501Y,A570D,D614G,P681H,T716I,S982A,D1118H	TRUE
EPI_ISL_643784	2020-10-29	delH69V70,Y145del,N501Y,A570D,D614G,P681H,T716I,S982A,D1118H	TRUE
EPI_ISL_655765	2020-11-09	delH69V70,Y145del,N501Y,A570D,D614G,P681H,T716I,S982A,D1118H	TRUE
EPI_ISL_655740	2020-11-09	delH69V70,Y145del,N501Y,A570D,D614G,P681H,T716I,S982A,D1118H	TRUE
EPI_ISL_679776	2020-11-01	delH69V70,Y145del,N501Y,A570D,D614G,P681H,T716I,S982A,D1118H	TRUE
EPI_ISL_679771	2020-11-01	delH69V70,Y145del,N501Y,A570D,D614G,P681H,T716I,S982A,D1118H	TRUE
EPI_ISL_679775	2020-11-01	delH69V70,Y145del,N501Y,A570D,D614G,P681H,T716I,S982A,D1118H	TRUE
EPI_ISL_679784	2020-11-02	delH69V70,Y145del,N501Y,A570D,D614G,P681H,T716I,S982A,D1118H	TRUE
EPI_ISL_718500	2020-12-11	delH69V70,Y145del,N501Y,A570D,D614G,P681H,T716I,S982A,D1118H	TRUE
EPI_ISL_718501	2020-12-10	delH69V70,Y145del,N501Y,A570D,D614G,P681H,T716I,S982A,D1118H	TRUE
EPI_ISL_701683	2020-11-19	delH69V70,Y145del,N501Y,A570D,D614G,P681H,T716I,S982A,D1118H	TRUE
EPI_ISL_679778	2020-11-01	delH69V70,Y145del,N501Y,A570D,D614G,P681H,T716I,S982A,D1118H	TRUE
EPI_ISL_718507	2020-12-10	delH69V70,Y145del,N501Y,A570D,D614G,P681H,T716I,S982A,D1118H	TRUE
EPI_ISL_718505	2020-12-10	delH69V70,Y145del,N501Y,A570D,D614G,P681H,T716I,S982A,D1118H	TRUE
EPI_ISL_701698	2020-11-19	delH69V70,Y145del,N501Y,A570D,D614G,P681H,T716I,S982A,D1118H	TRUE
EPI_ISL_679787	2020-11-02	delH69V70,Y145del,N501Y,A570D,D614G,P681H,T716I,S982A,D1118H	TRUE
EPI_ISL_718503	2020-12-10	delH69V70,Y145del,N501Y,A570D,D614G,P681H,T716I,S982A,D1118H	TRUE
EPI_ISL_718508	2020-12-10	delH69V70,Y145del,N501Y,A570D,D614G,P681H,T716I,S982A,D1118H	TRUE
EPI_ISL_720801	2020-12-02	delH69V70,Y145del,N501Y,A570D,D614G,P681H,T716I,S982A,D1118H	TRUE
EPI_ISL_720806	2020-12-03	delH69V70,Y145del,N501Y,A570D,D614G,P681H,T716I,S982A,D1118H	TRUE
EPI_ISL_720807	2020-12-03	delH69V70,Y145del,N501Y,A570D,D614G,P681H,T716I,S982A,D1118H	TRUE
EPI_ISL_720803	2020-12-03	delH69V70,Y145del,N501Y,A570D,D614G,P681H,T716I,S982A,D1118H	TRUE
EPI_ISL_723044	2020-12-11	delH69V70,Y145del,N501Y,A570D,D614G,P681H,T716I,S982A,D1118H	TRUE
EPI_ISL_720814	2020-12-04	delH69V70,Y145del,N501Y,A570D,D614G,P681H,T716I,S982A,D1118H	TRUE
EPI_ISL_736300	2020-12-11	delH69V70,Y145del,N501Y,A570D,D614G,P681H,T716I,S982A,D1118H	TRUE
EPI_ISL_736302	2020-12-11	delH69V70,Y145del,N501Y,A570D,D614G,P681H,T716I,S982A,D1118H	TRUE
EPI_ISL_725648	2020-12-10	V6A,delH69V70,Y145del,N501Y,A570D,D614G,P681H,T716I,S982A,D1118H	TRUE
EPI_ISL_725652	2020-12-10	delH69V70,Y145del,N501Y,A570D,D614G,P681H,T716I,S982A,D1118H	TRUE
EPI_ISL_736320	2020-12-12	delH69V70,Y145del,N501Y,A570D,D614G,P681H,T716I,S982A,D1118H	TRUE
EPI_ISL_736305	2020-12-11	delH69V70,Y145del,N501Y,A570D,D614G,P681H,T716I,S982A,D1118H	TRUE
EPI_ISL_723042	2020-12-09	delH69V70,Y145del,N501Y,A570D,D614G,P681H,T716I,I818V,S982A,D1118H	TRUE
EPI_ISL_720818	2020-12-02	delH69V70,Y145del,N501Y,A570D,D614G,P681H,T716I,S982A,D1118H	TRUE
EPI_ISL_736322	2020-12-11	delH69V70,Y145del,N501Y,A570D,D614G,P681H,T716I,S982A,D1118H	TRUE
EPI_ISL_736323	2020-12-12	delH69V70,Y145del,N501Y,A570D,D614G,P681H,T716I,S982A,D1118H	TRUE
EPI_ISL_736335	2020-12-12	delH69V70,Y145del,N501Y,A570D,D614G,P681H,T716I,S982A,D1118H	TRUE
EPI_ISL_736319	2020-12-12	delH69V70,Y145del,S494P,N501Y,A570D,D614G,P681H,T716I,S982A,D1118H	TRUE
EPI_ISL_736336	2020-12-11	delH69V70,Y145del,N501Y,A570D,D614G,P681H,T716I,S982A,D1118H	TRUE
EPI_ISL_736324	2020-12-11	delH69V70,Y145del,N501Y,A570D,D614G,P681H,T716I,S982A,D1118H	TRUE
EPI_ISL_736310	2020-12-11	delH69V70,Y145del,N501Y,A570D,D614G,P681H,T716I,S982A,D1118H	TRUE
EPI_ISL_736326	2020-12-11	delH69V70,Y145del,N501Y,A570D,D614G,P681H,T716I,S982A,D1118H	TRUE
EPI_ISL_736340	2020-12-11	delH69V70,Y145del,T478I,N501Y,A570D,D614G,P681H,T716I,S982A,D1118H	TRUE
EPI_ISL_736341	2020-12-11	delH69V70,Y145del,N501Y,A570D,D614G,P681H,T716I,S982A,D1118H	TRUE
EPI_ISL_736345	2020-12-11	delH69V70,Y145del,N501Y,A570D,D614G,P681H,T716I,S982A,D1118H	TRUE
EPI_ISL_736344	2020-12-11	delH69V70,Y145del,N501Y,A570D,D614G,P681H,T716I,S982A,D1118H	TRUE
EPI_ISL_736339	2020-12-11	delH69V70,Y145del,N501Y,A570D,D614G,P681H,T716I,S982A,D1118H	TRUE
EPI_ISL_736360	2020-12-11	delH69V70,Y145del,N501Y,A570D,D614G,P681H,T716I,S982A,D1118H	TRUE
EPI_ISL_736348	2020-12-11	A67V,delH69V70,Y145del,N501Y,A570D,D614G,P681H,T716I,S982A,D1118H	TRUE
EPI_ISL_736353	2020-12-12	delH69V70,Y145del,N501Y,A570D,D614G,P681H,T716I,S982A,D1118H	TRUE
EPI_ISL_736327	2020-12-11	delH69V70,Y145del,N501Y,A570D,D614G,P681H,T716I,S982A,D1118H	TRUE
EPI_ISL_736364	2020-12-11	delH69V70,Y145del,N501Y,A570D,D614G,P681H,T716I,S982A,D1118H	TRUE
EPI_ISL_736349	2020-12-08	delH69V70,Y145del,N501Y,A570D,D614G,P681H,A706V,T716I,S982A,D1118H	TRUE
EPI_ISL_736354	2020-12-12	delH69V70,Y145del,N501Y,A570D,D614G,P681H,T716I,S982A,D1118H	TRUE
EPI_ISL_736365	2020-12-11	delH69V70,Y145del,N501Y,A570D,D614G,P681H,T716I,S982A,D1118H	TRUE
EPI_ISL_736357	2020-12-11	delH69V70,Y145del,N501Y,A570D,D614G,P681H,T716I,S982A,D1118H	TRUE
EPI_ISL_736362	2020-12-12	delH69V70,Y145del,N501Y,A570D,D614G,P681H,T716I,S982A,D1118H	TRUE
EPI_ISL_736359	2020-12-11	delH69V70,Y145del,T478I,N501Y,A570D,D614G,P681H,T716I,S982A,D1118H	TRUE
EPI_ISL_736397	2020-12-12	delH69V70,Y145del,N501Y,A570D,D614G,P681H,T716I,S982A,D1118H	TRUE
EPI_ISL_736369	2020-12-08	delH69V70,Y145del,N501Y,A570D,D614G,P681H,T716I,S982A,D1118H	TRUE
EPI_ISL_736393	2020-12-11	delH69V70,Y145del,N501Y,A570D,D614G,P681H,T716I,S982A,D1118H	TRUE
EPI_ISL_736379	2020-12-11	delH69V70,Y145del,N501Y,A570D,D614G,P681H,T716I,S982A,D1118H	TRUE
EPI_ISL_736380	2020-12-08	delH69V70,Y145del,N501Y,A570D,D614G,P681H,T716I,S982A,D1118H	TRUE
EPI_ISL_736366	2020-12-11	delH69V70,Y145del,N501Y,A570D,D614G,P681H,T716I,S982A,D1118H	TRUE
EPI_ISL_736384	2020-12-12	R21T,delH69V70,Y145del,N501Y,A570D,D614G,P681H,T716I,S982A,D1118H	TRUE
EPI_ISL_736383	2020-12-12	delH69V70,Y145del,N501Y,A570D,D614G,P681H,T716I,S982A,D1118H	TRUE
EPI_ISL_736368	2020-12-11	delH69V70,Y145del,N501Y,A570D,D614G,P681H,T716I,S982A,D1118H	TRUE
EPI_ISL_736392	2020-12-07	delH69V70,Y145del,N501Y,A570D,D614G,P681H,T716I,S982A,D1118H	TRUE
EPI_ISL_736395	2020-12-11	delH69V70,Y145del,N501Y,A570D,D614G,P681H,T716I,S982A,D1118H	TRUE
EPI_ISL_762601	2020-12-17	delH69V70,Y145del,N501Y,A570D,D614G,P681H,T716I,S982A,D1118H	TRUE
EPI_ISL_761332	2020-12-17	delH69V70,Y145del,N501Y,A570D,D614G,P681H,T716I,S982A,D1118H	TRUE
EPI_ISL_736396	2020-12-12	delH69V70,Y145del,N501Y,A570D,D614G,P681H,T716I,S982A,D1118H	TRUE
EPI_ISL_762604	2020-12-16	delH69V70,Y145del,N501Y,A570D,D614G,P681H,T716I,S982A,D1118H	TRUE
EPI_ISL_761341	2020-12-17	delH69V70,Y145del,N501Y,A570D,D614G,P681H,T716I,S982A,D1118H	TRUE
EPI_ISL_761337	2020-12-17	delH69V70,Y145del,N501Y,A570D,D614G,P681H,T716I,S982A,D1118H	TRUE
EPI_ISL_761305	2020-12-18	delH69V70,Y145del,E484K,N501Y,A570D,D614G,P681H,T716I,S982A,D1118H	TRUE
EPI_ISL_762602	2020-12-16	delH69V70,Y145del,S494P,N501Y,A570D,D614G,P681H,T716I,S982A,D1118H	TRUE
EPI_ISL_761354	2020-12-18	delH69V70,Y145del,N501Y,A570D,D614G,P681H,T716I,S982A,D1118H	TRUE
EPI_ISL_762610	2020-12-16	delH69V70,Y145del,N501Y,A570D,D614G,P681H,T716I,S982A,D1118H	TRUE
EPI_ISL_762609	2020-12-16	delH69V70,Y145del,N501Y,A570D,D614G,P681H,T716I,S982A,D1118H	TRUE
EPI_ISL_762615	2020-12-17	delH69V70,Y145del,N501Y,A570D,D614G,P681H,T716I,S982A,D1118H	TRUE
EPI_ISL_762608	2020-12-17	delH69V70,Y145del,N501Y,A570D,D614G,P681H,T716I,S982A,D1118H	TRUE
EPI_ISL_762612	2020-12-17	delH69V70,Y145del,N501Y,A570D,D614G,P681H,T716I,S982A,D1118H	TRUE
EPI_ISL_762613	2020-12-17	delH69V70,Y145del,S494P,N501Y,A570D,D614G,P681H,T716I,S982A,D1118H	TRUE
EPI_ISL_762607	2020-12-18	delH69V70,Y145del,N501Y,A570D,D614G,P681H,T716I,S982A,D1118H	TRUE
EPI_ISL_762620	2020-12-17	delH69V70,T95I,Y145del,N501Y,A570D,D614G,P681H,T716I,S982A,D1118H	TRUE
EPI_ISL_762617	2020-12-16	delH69V70,Y145del,N501Y,A570D,D614G,P681H,T716I,S982A,D1118H	TRUE
EPI_ISL_762618	2020-12-16	delH69V70,Y145del,H146Q,N501Y,A570D,D614G,P681H,T716I,S982A,D1118H	TRUE
EPI_ISL_762623	2020-12-18	delH69V70,Y145del,N501Y,A570D,D614G,P681H,T716I,S982A,D1118H	TRUE
EPI_ISL_762621	2020-12-17	delH69V70,Y145del,N501Y,A570D,D614G,P681H,T716I,S982A,D1118H	TRUE
EPI_ISL_762605	2020-12-16	delH69V70,Y145del,N501Y,A570D,D614G,P681H,T716I,S982A,D1118H	TRUE
EPI_ISL_762616	2020-12-17	delH69V70,Y145del,N501Y,A570D,D614G,P681H,T716I,S982A,D1118H	TRUE
EPI_ISL_762625	2020-12-16	delH69V70,Y145del,N501Y,A570D,D614G,P681H,T716I,S982A,D1118H	TRUE
EPI_ISL_762631	2020-12-16	delH69V70,Y145del,N501Y,A570D,D614G,P681H,T716I,S982A,D1118H	TRUE
EPI_ISL_762626	2020-12-17	delH69V70,Y145del,N501Y,A570D,D614G,P681H,T716I,S982A,D1118H	TRUE
EPI_ISL_762627	2020-12-17	delH69V70,Y145del,N501Y,A570D,D614G,P681H,T716I,S982A,D1118H	TRUE
EPI_ISL_762633	2020-12-16	delH69V70,Y145del,N501Y,A570D,D614G,P681H,T716I,S982A,D1118H	TRUE
EPI_ISL_762636	2020-12-17	delH69V70,Y145del,N501Y,A570D,D614G,P681H,T716I,S982A,D1118H	TRUE
EPI_ISL_762635	2020-12-17	delH69V70,Y145del,N501Y,A570D,D614G,P681H,T716I,S982A,D1118H	TRUE
EPI_ISL_762630	2020-12-16	delH69V70,Y145del,N501Y,A570D,D614G,P681H,T716I,S982A,D1118H	TRUE
EPI_ISL_762640	2020-12-17	delH69V70,Y145del,N501Y,A570D,D614G,P681H,T716I,S982A,D1118H	TRUE
EPI_ISL_762646	2020-12-16	delH69V70,Y145del,N501Y,A570D,D614G,P681H,A706V,T716I,S982A,D1118H	TRUE
EPI_ISL_762642	2020-12-16	delH69V70,Y145del,N501Y,A570D,D614G,P681H,T716I,S982A,D1118H	TRUE
EPI_ISL_762650	2020-12-17	delH69V70,Y145del,N501Y,A570D,D614G,P681H,T716I,S982A,D1118H	TRUE
EPI_ISL_762645	2020-12-17	delH69V70,Y145del,N501Y,A570D,D614G,P681H,T716I,S982A,D1118H	TRUE
EPI_ISL_762638	2020-12-16	delH69V70,Y145del,N501Y,A570D,D614G,P681H,T716I,S982A,D1118H	TRUE
EPI_ISL_762639	2020-12-16	delH69V70,Y145del,N501Y,A570D,D614G,P681H,T716I,S982A,D1118H	TRUE
EPI_ISL_762644	2020-12-16	delH69V70,Y145del,N501Y,A570D,D614G,P681H,T716I,S982A,D1118H	TRUE
EPI_ISL_762651	2020-12-17	delH69V70,Y145del,N501Y,A570D,D614G,P681H,T716I,S982A,D1118H	TRUE
EPI_ISL_762654	2020-12-16	delH69V70,Y145del,N501Y,A570D,D614G,P681H,T716I,S982A,D1118H	TRUE
EPI_ISL_762653	2020-12-16	delH69V70,Y145del,N501Y,A570D,D614G,P681H,T716I,S982A,D1118H	TRUE
EPI_ISL_762658	2020-12-17	delH69V70,Y145del,N501Y,A570D,D614G,P681H,T716I,S982A,D1118H	TRUE
EPI_ISL_762657	2020-12-16	delH69V70,Y145del,N501Y,A570D,D614G,P681H,T716I,S982A,D1118H	TRUE
EPI_ISL_762656	2020-12-16	delH69V70,Y145del,N501Y,A570D,D614G,P681H,A706V,T716I,S982A,D1118H	TRUE
EPI_ISL_762649	2020-12-17	delH69V70,Y145del,A475V,N501Y,A570D,D614G,P681H,T716I,S982A,D1118H	TRUE
EPI_ISL_762662	2020-12-16	delH69V70,Y145del,N501Y,A570D,D614G,P681H,T716I,S982A,D1118H	TRUE
EPI_ISL_762660	2020-12-17	delH69V70,Y145del,N501Y,A570D,D614G,P681H,T716I,S982A,D1118H	TRUE
EPI_ISL_762665	2020-12-17	delH69V70,Y145del,N501Y,A570D,D614G,P681H,T716I,S982A,D1118H	TRUE
EPI_ISL_762664	2020-12-17	delH69V70,Y145del,N501Y,A570D,D614G,P681H,T716I,S982A,D1118H	TRUE
EPI_ISL_762661	2020-12-16	delH69V70,Y145del,N501Y,A570D,D614G,P681H,T716I,S982A,D1118H	TRUE
EPI_ISL_762678	2020-12-16	delH69V70,Y145del,N501Y,A570D,D614G,P681H,T716I,S982A,D1118H	TRUE
EPI_ISL_762671	2020-12-16	delH69V70,Y145del,N501Y,A570D,D614G,P681H,T716I,S982A,D1118H	TRUE
EPI_ISL_762675	2020-12-17	delH69V70,Y145del,N501Y,A570D,D614G,P681H,T716I,S982A,D1118H	TRUE
EPI_ISL_762672	2020-12-16	delH69V70,Y145del,N501Y,A570D,D614G,P681H,T716I,S982A,D1118H	TRUE
EPI_ISL_762669	2020-12-16	delH69V70,Y145del,N501Y,A570D,D614G,P681H,T716I,S982A,D1118H	TRUE
EPI_ISL_762679	2020-12-17	delH69V70,Y145del,N501Y,A570D,D614G,P681H,T716I,S982A,D1118H	TRUE
EPI_ISL_762673	2020-12-18	delH69V70,Y145del,N501Y,A570D,D614G,P681H,T716I,S982A,D1118H	TRUE
EPI_ISL_762668	2020-12-17	delH69V70,Y145del,N501Y,A570D,D614G,P681H,T716I,S982A,D1118H	TRUE
EPI_ISL_762680	2020-12-17	delH69V70,Y145del,N501Y,A570D,D614G,P681H,T716I,S982A,D1118H	TRUE
EPI_ISL_762663	2020-12-16	delH69V70,Y145del,N501Y,A570D,D614G,P681H,T716I,S982A,D1118H	TRUE
EPI_ISL_762676	2020-12-16	delH69V70,Y145del,N501Y,A570D,D614G,P681H,T716I,S982A,D1118H	TRUE
EPI_ISL_762674	2020-12-17	L18F,delH69V70,Y145del,N501Y,A570D,D614G,P681H,T716I,S982A,D1118H	TRUE
EPI_ISL_762670	2020-12-17	delH69V70,Y145del,N501Y,A570D,D614G,P681H,T716I,A831V,S982A,D1118H	TRUE
EPI_ISL_762685	2020-12-17	delH69V70,Y145del,N501Y,A570D,D614G,P681H,T716I,S982A,D1118H	TRUE
EPI_ISL_762681	2020-12-17	delH69V70,Y145del,N501Y,A570D,D614G,P681H,T716I,S982A,D1118H	TRUE
EPI_ISL_762682	2020-12-17	delH69V70,Y145del,N501Y,A570D,D614G,P681H,T716I,S982A,D1118H	TRUE
EPI_ISL_762683	2020-12-16	delH69V70,Y145del,N501Y,A570D,D614G,P681H,T716I,S982A,D1118H	TRUE
EPI_ISL_762686	2020-12-16	delH69V70,Y145del,N501Y,A570D,D614G,P681H,T716I,S982A,D1118H	TRUE
EPI_ISL_762684	2020-12-17	delH69V70,Y145del,N501Y,A570D,D614G,P681H,T716I,S982A,D1118H	TRUE
EPI_ISL_763932	2020-12-13	delH69V70,Y145del,N501Y,A570D,D614G,P681H,T716I,S982A,D1118H	TRUE
EPI_ISL_763930	2020-12-14	delH69V70,Y145del,N501Y,A570D,D614G,P681H,T716I,S982A,D1118H	TRUE
EPI_ISL_763931	2020-12-14	delH69V70,Y145del,N501Y,A570D,D614G,P681H,T716I,S982A,D1118H	TRUE
EPI_ISL_763933	2020-12-13	delH69V70,Y145del,N501Y,A570D,D614G,P681H,T716I,S982A,D1118H	TRUE
EPI_ISL_763936	2020-12-14	delH69V70,Y145del,N501Y,A570D,D614G,P681H,T716I,S982A,D1118H	TRUE
EPI_ISL_763935	2020-12-09	delH69V70,Y145del,N501Y,A570D,D614G,P681H,T716I,S982A,D1118H	TRUE
EPI_ISL_763940	2020-12-08	delH69V70,Y145del,N501Y,A570D,D614G,P681H,T716I,S982A,D1118H,E1182D	TRUE
EPI_ISL_763941	2020-12-09	delH69V70,Y145del,N501Y,A570D,D614G,P681H,T716I,S982A,D1118H	TRUE
EPI_ISL_763938	2020-12-14	delH69V70,Y145del,N501Y,A570D,D614G,P681H,T716I,S982A,D1118H	TRUE
EPI_ISL_763945	2020-12-08	delH69V70,Y145del,N501Y,A570D,D614G,P681H,T716I,S982A,D1118H	TRUE
EPI_ISL_763942	2020-12-10	delH69V70,Y145del,N501Y,A570D,D614G,P681H,T716I,S982A,D1118H	TRUE
EPI_ISL_763939	2020-12-14	delH69V70,Y145del,N501Y,A570D,D614G,P681H,T716I,S982A,D1118H	TRUE
EPI_ISL_763943	2020-12-14	delH69V70,Y145del,N501Y,A570D,D614G,P681H,T716I,S982A,D1118H	TRUE
EPI_ISL_763937	2020-12-14	delH69V70,Y145del,N501Y,A570D,D614G,P681H,T716I,S982A,D1118H	TRUE
EPI_ISL_763934	2020-12-08	delH69V70,Y145del,N501Y,A570D,D614G,P681H,T716I,S982A,D1118H	TRUE
EPI_ISL_763948	2020-12-11	delH69V70,Y145del,N501Y,A570D,D614G,P681H,T716I,S982A,D1118H	TRUE
EPI_ISL_763944	2020-12-14	delH69V70,Y145del,N501Y,A570D,D614G,P681H,T716I,S982A,D1118H	TRUE
EPI_ISL_763946	2020-12-10	delH69V70,Y145del,A222V,N501Y,A570D,D614G,P681H,T716I,S982A,D1118H	TRUE
EPI_ISL_763955	2020-12-15	delH69V70,Y145del,N501Y,A570D,D614G,P681H,T716I,S982A,D1118H	TRUE
EPI_ISL_763949	2020-12-14	delH69V70,Y145del,N501Y,A570D,D614G,P681H,T716I,S982A,D1118H	TRUE
EPI_ISL_763953	2020-12-15	delH69V70,Y145del,N501Y,A570D,D614G,P681H,T716I,S982A,D1118H	TRUE
EPI_ISL_763957	2020-12-15	delH69V70,Y145del,D287G,N501Y,A570D,D614G,P681H,T716I,S982A,D1118H	TRUE
EPI_ISL_763951	2020-12-14	delH69V70,Y145del,N501Y,A570D,D614G,P681H,T716I,S982A,D1118H	TRUE
EPI_ISL_763960	2020-12-14	delH69V70,D138H,Y145del,N501Y,A570D,D614G,P681H,T716I,S982A,D1118H	TRUE
EPI_ISL_763954	2020-12-15	delH69V70,Y145del,N501Y,A570D,D614G,P681H,T716I,S982A,D1118H	TRUE
EPI_ISL_763950	2020-12-15	delH69V70,Y145del,S494P,N501Y,A570D,D614G,P681H,T716I,S982A,D1118H	TRUE
EPI_ISL_763959	2020-12-14	delH69V70,Y145del,N501Y,A570D,D614G,P681H,T716I,S982A,D1118H	TRUE
EPI_ISL_763962	2020-12-15	delH69V70,Y145del,N501Y,A570D,D614G,P681H,T716I,S982A,D1118H	TRUE
EPI_ISL_763947	2020-12-13	delH69V70,Y145del,S494P,N501Y,A570D,D614G,P681H,T716I,S982A,D1118H	TRUE
EPI_ISL_763958	2020-12-15	delH69V70,Y145del,N501Y,A570D,D614G,P681H,T716I,S982A,D1118H	TRUE
EPI_ISL_763964	2020-12-15	delH69V70,Y145del,N501Y,A570D,D614G,P681H,T716I,S982A,D1118H	TRUE
EPI_ISL_763956	2020-12-15	delH69V70,Y145del,N501Y,A570D,D614G,P681H,T716I,S982A,D1118H	TRUE
EPI_ISL_763961	2020-12-15	delH69V70,Y145del,N501Y,A570D,D614G,P681H,T716I,S982A,D1118H	TRUE
EPI_ISL_763967	2020-12-15	delH69V70,Y145del,N501Y,A570D,D614G,P681H,T716I,S982A,D1118H	TRUE
EPI_ISL_763968	2020-12-15	delH69V70,Y145del,N501Y,A570D,D614G,P681H,T716I,S982A,D1118H	TRUE
EPI_ISL_763952	2020-12-14	A67V,delH69V70,Y145del,N501Y,A570D,D614G,P681H,T716I,S982A,D1118H	TRUE
EPI_ISL_763963	2020-12-15	delH69V70,Y145del,N501Y,A570D,D614G,P681H,T716I,S982A,D1118H	TRUE
EPI_ISL_763966	2020-12-14	delH69V70,Y145del,N501Y,A570D,D614G,P681H,T716I,S982A,D1118H	TRUE
EPI_ISL_763969	2020-12-15	delH69V70,Y145del,N501Y,A570D,D614G,P681H,T716I,S982A,D1118H	TRUE
EPI_ISL_766145	2020-12-16	delH69V70,Y145del,N501Y,A570D,D614G,P681H,T716I,S982A,D1118H,K1191N	TRUE
EPI_ISL_763970	2020-12-15	delH69V70,Y145del,N501Y,A570D,D614G,P681H,T716I,S982A,D1118H	TRUE
EPI_ISL_763971	2020-12-15	delH69V70,Y145del,N501Y,A570D,D614G,P681H,T716I,S982A,D1118H	TRUE
EPI_ISL_766146	2020-12-16	delH69V70,Y145del,N501Y,A570D,D614G,P681H,T716I,S982A,D1118H	TRUE
EPI_ISL_766140	2020-12-14	delH69V70,Y145del,N501Y,A570D,D614G,P681H,T716I,S982A,D1118H	TRUE
EPI_ISL_763974	2020-12-15	delH69V70,Y145del,N501Y,A570D,D614G,P681H,T716I,S982A,D1118H	TRUE
EPI_ISL_766143	2020-12-16	delH69V70,Y145del,N501Y,A570D,D614G,P681H,T716I,S982A,D1118H	TRUE
EPI_ISL_766141	2020-12-14	delH69V70,Y145del,N501Y,A570D,D614G,P681H,T716I,S982A,D1118H	TRUE
EPI_ISL_763973	2020-12-15	delH69V70,Y145del,N501Y,A570D,D614G,P681H,T716I,S982A,D1118H	TRUE
EPI_ISL_766142	2020-12-15	L18F,delH69V70,Y145del,N501Y,A570D,D614G,P681H,T716I,S982A,D1118H	TRUE
EPI_ISL_763972	2020-12-15	delH69V70,Y145del,N501Y,A570D,D614G,P681H,T716I,S982A,D1118H	TRUE
EPI_ISL_766151	2020-12-15	delH69V70,Y145del,N501Y,A570D,D614G,P681H,T716I,S982A,D1118H	TRUE
EPI_ISL_766148	2020-12-16	delH69V70,Y145del,N501Y,A570D,D614G,P681H,T716I,S982A,D1118H	TRUE
EPI_ISL_766144	2020-12-12	delH69V70,Y145del,N501Y,A570D,D614G,P681H,T716I,S982A,D1118H	TRUE
EPI_ISL_766147	2020-12-16	delH69V70,Y145del,N501Y,A570D,D614G,P681H,T716I,S982A,D1118H	TRUE
EPI_ISL_766153	2020-12-15	delH69V70,Y145del,N501Y,A570D,D614G,P681H,T716I,S982A,D1118H	TRUE
EPI_ISL_766149	2020-12-15	delH69V70,Y145del,N501Y,A570D,D614G,P681H,T716I,S982A,D1118H	TRUE
EPI_ISL_766154	2020-12-16	delH69V70,Y145del,N501Y,A570D,D614G,P681H,T716I,S982A,D1118H	TRUE
EPI_ISL_766152	2020-12-15	delH69V70,Y145del,N501Y,A570D,D614G,P681H,T716I,S982A,D1118H	TRUE
EPI_ISL_766155	2020-12-16	delH69V70,Y145del,N501Y,A570D,D614G,P681H,T716I,S982A,D1118H	TRUE
EPI_ISL_766157	2020-12-16	delH69V70,Y145del,N501Y,A570D,D614G,P681H,T716I,I818V,S982A,D1118H	TRUE
EPI_ISL_766150	2020-12-15	delH69V70,Y145del,N501Y,A570D,D614G,P681H,T716I,S982A,D1118H	TRUE
EPI_ISL_766167	2020-12-16	delH69V70,Y145del,N501Y,A570D,D614G,P681H,T716I,S982A,D1118H	TRUE
EPI_ISL_766162	2020-12-16	delH69V70,Y145del,N501Y,A570D,D614G,P681H,T716I,S982A,D1118H	TRUE
EPI_ISL_766156	2020-12-16	delH69V70,Y145del,N501Y,A570D,D614G,P681H,T716I,S982A,D1118H	TRUE
EPI_ISL_766169	2020-12-16	delH69V70,Y145del,N501Y,A570D,D614G,P681H,T716I,S982A,D1118H	TRUE
EPI_ISL_766160	2020-12-17	delH69V70,Y145del,N501Y,A570D,D614G,P681H,T716I,S982A,D1118H	TRUE
EPI_ISL_766163	2020-12-16	delH69V70,Y145del,N501Y,A570D,D614G,P681H,T716I,S982A,D1118H	TRUE
EPI_ISL_766161	2020-12-16	delH69V70,Y145del,N501Y,A570D,D614G,P681H,T716I,S982A,D1118H	TRUE
EPI_ISL_766166	2020-12-17	delH69V70,Y145del,N501Y,A570D,D614G,P681H,T716I,S982A,D1118H	TRUE
EPI_ISL_766158	2020-12-12	delH69V70,Y145del,N501Y,A570D,D614G,P681H,T716I,S982A,D1118H	TRUE
EPI_ISL_766159	2020-12-16	delH69V70,Y145del,N501Y,A570D,D614G,P681H,T716I,S982A,D1118H	TRUE
EPI_ISL_766164	2020-12-16	delH69V70,Y145del,N501Y,A570D,D614G,P681H,T716I,S982A,D1118H	TRUE
EPI_ISL_766168	2020-12-16	delH69V70,Y145del,N501Y,A570D,D614G,P681H,T716I,S982A,D1118H	TRUE
EPI_ISL_766165	2020-12-16	delH69V70,Y145del,N501Y,A570D,D614G,P681H,T716I,S982A,D1118H	TRUE
EPI_ISL_778112	2020-12-18	delH69V70,Y145del,N501Y,A570D,D614G,P681H,T716I,S982A,D1118H	TRUE
EPI_ISL_778139	2020-12-18	delH69V70,Y145del,N501Y,A570D,D614G,P681H,T716I,S982A,D1118H	TRUE
EPI_ISL_778120	2020-12-18	delH69V70,Y145del,N501Y,A570D,D614G,P681H,T716I,S982A,D1118H	TRUE
EPI_ISL_778125	2020-12-18	delH69V70,Y145del,N501Y,A570D,D614G,P681H,T716I,S982A,D1118H	TRUE
EPI_ISL_778137	2020-12-18	delH69V70,Y145del,S494P,N501Y,A570D,D614G,P681H,T716I,S982A,D1118H	TRUE
EPI_ISL_778110	2020-12-18	delH69V70,Y145del,N501Y,A570D,D614G,P681H,T716I,S982A,D1118H	TRUE
EPI_ISL_778135	2020-12-18	L5F,delH69V70,Y145del,N501Y,A570D,D614G,P681H,T716I,S982A,D1118H,W1217L	TRUE
EPI_ISL_778113	2020-12-18	delH69V70,Y145del,N501Y,A570D,D614G,P681H,T716I,S982A,D1118H	TRUE
EPI_ISL_778130	2020-12-18	delH69V70,Y145del,N501Y,P507A,A570D,D614G,P681H,T716I,S982A,D1118H	TRUE
EPI_ISL_778194	2020-12-18	delH69V70,Y145del,N501Y,A570D,D614G,P681H,T716I,S982A,D1118H	TRUE
EPI_ISL_781766	2020-12-18	delH69V70,Y145del,N501Y,A570D,D614G,P681H,T716I,S982A,D1118H	TRUE
EPI_ISL_778143	2020-12-18	delH69V70,Y145del,N501Y,A570D,D614G,P681H,T716I,S982A,D1118H	TRUE
EPI_ISL_781780	2020-12-18	delH69V70,Y145del,P217S,N501Y,A570D,D614G,P681H,T716I,S982A,D1118H	TRUE
EPI_ISL_781764	2020-12-18	delH69V70,Y145del,N501Y,A570D,D614G,P681H,T716I,S982A,D1118H	TRUE
EPI_ISL_781762	2020-12-18	delH69V70,Y145del,N501Y,A570D,D614G,P681H,T716I,S982A,D1118H	TRUE
EPI_ISL_778197	2020-12-18	delH69V70,Y145del,N501Y,A570D,D614G,P681H,A706V,T716I,S982A,D1118H	TRUE
EPI_ISL_791183	2020-12-18	N501Y,A570D,D614G,P681H,T716I,S982A,D1118H	TRUE
EPI_ISL_778199	2020-12-18	delH69V70,Y145del,N501Y,A570D,D614G,P681H,T716I,S982A,D1118H	TRUE
EPI_ISL_791186	2020-12-14	delH69V70,Y145del,N501Y,A570D,D614G,P681H,T716I,S982A,D1118H	TRUE
EPI_ISL_791185	2020-12-14	delH69V70,Y145del,N501Y,A570D,D614G,P681H,T716I,S982A,D1118H	TRUE
EPI_ISL_781772	2020-12-18	delH69V70,Y145del,N501Y,A570D,D614G,P681H,T716I,S982A,D1118H	TRUE
EPI_ISL_781760	2020-12-18	delH69V70,Y145del,N501Y,A570D,D614G,P681H,T716I,S982A,D1118H	TRUE
EPI_ISL_791184	2020-12-14	delH69V70,Y145del,N501Y,A570D,D614G,P681H,T716I,S982A,D1118H	TRUE
EPI_ISL_799900	2020-12-15	delH69V70,Y145del,N501Y,A570D,D614G,P681H,T716I,S982A,D1118H	TRUE
EPI_ISL_791188	2020-12-18	delH69V70,Y145del,N501Y,A570D,D614G,P681H,T716I,S982A,D1118H	TRUE
EPI_ISL_791187	2020-12-17	delH69V70,Y145del,N501Y,A570D,D614G,P681H,T716I,S982A,D1118H	TRUE
EPI_ISL_814289	2020-12-18	delH69V70,Y145del,N501Y,A570D,D614G,P681H,T716I,S982A,D1118H	TRUE
EPI_ISL_814288	2020-12-18	delH69V70,Y145del,A570D,D614G,P681H,T716I,S982A,D1118H	TRUE
EPI_ISL_791189	2020-12-18	delH69V70,Y145del,N501Y,A570D,D614G,P681H,T716I,S982A,D1118H	TRUE
EPI_ISL_839587	2020-12-16	delH69V70,Y145del,N501Y,A570D,D614G,P681H,T716I,S982A,D1118H	TRUE
EPI_ISL_647237	2020-11-02	delH69V70,Y145del,N501Y,A570D,D614G,P681H,T716I,S982A,D1118H	TRUE
EPI_ISL_826281	2020-11-23	delH69V70,Y145del,N501Y,A570D,D614G,P681H,T716I,S982A,D1118H	TRUE
EPI_ISL_839583	2020-12-16	delH69V70,Y145del,A570D,D614G,P681H,T716I,S982A,D1118H	TRUE
EPI_ISL_647219	2020-11-03	delH69V70,Y145del,N501Y,A570D,D614G,P681H,T716I,S982A,D1118H	TRUE
EPI_ISL_841867	2020-12-17	delH69V70,Y145del,N501Y,A570D,D614G,P681H,T716I,S982A,D1118H	TRUE
EPI_ISL_839558	2020-12-14	delH69V70,Y145del,N501Y,A570D,D614G,P681H,T716I,S982A,D1118H	TRUE
EPI_ISL_839556	2020-12-14	delH69V70,Y145del,H146Q,N501Y,A570D,D614G,P681H,T716I,S982A,D1118H	TRUE
EPI_ISL_659249	2020-11-05	delH69V70,Y145del,N501Y,A570D,D614G,P681H,A706V,T716I,S982A,D1118H	TRUE
EPI_ISL_659236	2020-11-05	delH69V70,Y145del,N501Y,A570D,D614G,P681H,T716I,S982A,D1118H	TRUE
EPI_ISL_647258	2020-11-02	delH69V70,Y145del,N501Y,A570D,D614G,P681H,T716I,S982A,D1118H	TRUE
EPI_ISL_647264	2020-11-02	delH69V70,Y145del,N501Y,A570D,D614G,P681H,T716I,S982A,D1118H	TRUE
EPI_ISL_659239	2020-11-05	delH69V70,Y145del,N501Y,A570D,D614G,P681H,A706V,T716I,S982A,D1118H	TRUE
EPI_ISL_659233	2020-11-05	delH69V70,Y145del,N501Y,A570D,D614G,P681H,T716I,S982A,D1118H	TRUE
EPI_ISL_659207	2020-11-05	delH69V70,Y145del,N501Y,A570D,D614G,P681H,T716I,S982A,D1118H	TRUE
EPI_ISL_661538	2020-11-10	delH69V70,Y145del,N501Y,A570D,D614G,P681H,T716I,S982A,D1118H	TRUE
EPI_ISL_661516	2020-11-08	delH69V70,Y145del,N501Y,A570D,D614G,P681H,T716I,S982A,D1118H	TRUE
EPI_ISL_673522	2020-11-15	delH69V70,Y145del,N501Y,A570D,D614G,P681H,T716I,S982A,D1118H	TRUE
EPI_ISL_673534	2020-11-15	delH69V70,Y145del,N501Y,A570D,D614G,P681H,T716I,S982A,D1118H	TRUE
EPI_ISL_673518	2020-11-15	delH69V70,Y145del,N501Y,A570D,D614G,P681H,T716I,S982A,D1118H	TRUE
EPI_ISL_661546	2020-11-10	delH69V70,Y145del,N501Y,A570D,D614G,P681H,T716I,S982A,D1118H	TRUE
EPI_ISL_673507	2020-11-15	delH69V70,Y145del,N501Y,A570D,D614G,P681H,T716I,S982A,D1118H	TRUE
EPI_ISL_673525	2020-11-15	delH69V70,Y145del,N501Y,A570D,D614G,P681H,T716I,S982A,D1118H	TRUE
EPI_ISL_674802	2020-11-13	delH69V70,Y145del,N501Y,A570D,D614G,P681H,A706V,T716I,S982A,D1118H	TRUE
EPI_ISL_673524	2020-11-15	delH69V70,Y145del,N501Y,A570D,D614G,P681H,T716I,S982A,D1118H	TRUE
EPI_ISL_674843	2020-11-14	delH69V70,Y145del,N501Y,A570D,D614G,P681H,T716I,S982A,D1118H	TRUE
EPI_ISL_673531	2020-11-15	delH69V70,Y145del,N501Y,A570D,D614G,P681H,T716I,S982A,D1118H	TRUE
EPI_ISL_659241	2020-11-05	delH69V70,Y145del,N501Y,A570D,D614G,P681H,A706V,T716I,S982A,D1118H	TRUE
EPI_ISL_674806	2020-11-13	delH69V70,Y145del,N501Y,A570D,D614G,P681H,T716I,S982A,D1118H	TRUE
EPI_ISL_674801	2020-11-13	delH69V70,Y145del,N501Y,A570D,D614G,P681H,T716I,S982A,D1118H	TRUE
EPI_ISL_674873	2020-11-15	delH69V70,Y145del,N501Y,A570D,D614G,P681H,T716I,S982A,D1118H,D1146Y	TRUE
EPI_ISL_674823	2020-11-14	delH69V70,Y145del,N501Y,A570D,D614G,P681H,T716I,S982A,D1118H	TRUE
EPI_ISL_705232	2020-12-02	delH69V70,Y145del,N501Y,A570D,D614G,P681H,T716I,S982A,D1118H	TRUE
EPI_ISL_718515	2020-12-10	delH69V70,Y145del,N501Y,A570D,D614G,P681H,T716I,S982A,D1118H	TRUE
EPI_ISL_718519	2020-12-10	delH69V70,Y145del,N501Y,A570D,D614G,P681H,T716I,S982A,D1118H	TRUE
EPI_ISL_718510	2020-12-10	delH69V70,Y145del,N501Y,A570D,D614G,P681H,T716I,S982A,D1118H	TRUE
EPI_ISL_718518	2020-12-10	delH69V70,Y145del,N501Y,A570D,D614G,P681H,T716I,S982A,D1118H	TRUE
EPI_ISL_718516	2020-12-10	delH69V70,Y145del,N501Y,A570D,D614G,P681H,T716I,S982A,D1118H	TRUE
EPI_ISL_674872	2020-11-14	delH69V70,Y145del,N501Y,A570D,D614G,P681H,T716I,S982A,D1118H	TRUE
EPI_ISL_718511	2020-12-10	delH69V70,Y145del,N501Y,A570D,D614G,P681H,T716I,S982A,D1118H	TRUE
EPI_ISL_718514	2020-12-10	delH69V70,Y145del,N501Y,A570D,D614G,P681H,T716I,S982A,D1118H	TRUE
EPI_ISL_718513	2020-12-10	delH69V70,Y145del,N501Y,A570D,D614G,P681H,T716I,S982A,D1118H	TRUE
EPI_ISL_718512	2020-12-10	delH69V70,Y145del,N501Y,A570D,D614G,P681H,T716I,S982A,D1118H	TRUE
EPI_ISL_718530	2020-12-10	delH69V70,Y145del,N501Y,A570D,D614G,P681H,T716I,S982A,D1118H	TRUE
EPI_ISL_718531	2020-12-10	delH69V70,Y145del,N501Y,A570D,D614G,P681H,T716I,S982A,D1118H	TRUE
EPI_ISL_718522	2020-12-10	delH69V70,Y145del,N501Y,A570D,D614G,P681H,T716I,S982A,D1118H	TRUE
EPI_ISL_718533	2020-12-10	delH69V70,Y145del,N501Y,A570D,D614G,P681H,T716I,S982A,D1118H	TRUE
EPI_ISL_718537	2020-12-10	delH69V70,Y145del,N501Y,A570D,D614G,P681H,T716I,S982A,D1118H	TRUE
EPI_ISL_718520	2020-12-10	delH69V70,Y145del,N501Y,A570D,S591F,D614G,P681H,T716I,S982A,D1118H	TRUE
EPI_ISL_718528	2020-12-10	delH69V70,Y145del,N501Y,A570D,D614G,P681H,T716I,S982A,D1118H	TRUE
EPI_ISL_718524	2020-12-10	delH69V70,Y145del,N501Y,A570D,D614G,P681H,T716I,S982A,D1118H	TRUE
EPI_ISL_718521	2020-12-10	delH69V70,Y145del,N501Y,A570D,D614G,P681H,T716I,S982A,D1118H	TRUE
EPI_ISL_718523	2020-12-10	delH69V70,Y145del,N501Y,A570D,D614G,P681H,T716I,S982A,D1118H	TRUE
EPI_ISL_718534	2020-12-10	delH69V70,Y145del,N501Y,A570D,D614G,P681H,T716I,S982A,D1118H	TRUE
EPI_ISL_718540	2020-12-10	delH69V70,Y145del,N501Y,A570D,D614G,P681H,T716I,S982A,D1118H	TRUE
EPI_ISL_718551	2020-12-10	delH69V70,Y145del,N501Y,A570D,D614G,P681H,T716I,S982A,D1118H	TRUE
EPI_ISL_718538	2020-12-10	delH69V70,Y145del,N501Y,A570D,D614G,P681H,T716I,S982A,D1118H	TRUE
EPI_ISL_718548	2020-12-10	delH69V70,Y145del,N501Y,A570D,D614G,P681R,T716I,S982A,D1118H	TRUE
EPI_ISL_718546	2020-12-10	delH69V70,Y145del,N501Y,A570D,D614G,P681H,T716I,S982A,D1118H	TRUE
EPI_ISL_718549	2020-12-10	delH69V70,Y145del,N501Y,A570D,D614G,P681H,T716I,S982A,D1118H	TRUE
EPI_ISL_718539	2020-12-10	delH69V70,Y145del,N501Y,A570D,D614G,P681H,T716I,S982A,D1118H	TRUE
EPI_ISL_718554	2020-12-10	delH69V70,Y145del,N501Y,A570D,D614G,P681H,T716I,S982A,D1118H	TRUE
EPI_ISL_718545	2020-12-10	delH69V70,Y145del,N501Y,A570D,D614G,P681H,T716I,S982A,D1118H	TRUE
EPI_ISL_718557	2020-12-10	delH69V70,Y145del,S494P,N501Y,A570D,D614G,P681H,T716I,S982A,D1118H	TRUE
EPI_ISL_718552	2020-12-10	delH69V70,Y145del,N501Y,A570D,D614G,P681H,T716I,S982A,D1118H	TRUE
EPI_ISL_718550	2020-12-10	delH69V70,E96D,Y145del,N501Y,A570D,D614G,P681H,T716I,S982A,D1118H	TRUE
EPI_ISL_718564	2020-12-10	delH69V70,Y145del,N501Y,A570D,D614G,P681H,T716I,S982A,D1118H	TRUE
EPI_ISL_718563	2020-12-10	delH69V70,Y145del,N501Y,A570D,D614G,P681H,T716I,S982A,D1118H	TRUE
EPI_ISL_718560	2020-12-10	delH69V70,Y145del,N501Y,A570D,D614G,P681H,T716I,S982A,D1118H	TRUE
EPI_ISL_718555	2020-12-10	delH69V70,Y145del,N501Y,A570D,D614G,P681H,T716I,S982A,D1118H	TRUE
EPI_ISL_718562	2020-12-10	delH69V70,Y145del,N501Y,A570D,D614G,P681H,T716I,S982A,D1118H	TRUE
EPI_ISL_718559	2020-12-10	delH69V70,Y145del,N501Y,A570D,D614G,P681H,T716I,S982A,D1118H	TRUE
EPI_ISL_718571	2020-12-10	delH69V70,Y145del,N501Y,A570D,D614G,P681H,T716I,S982A,D1118H	TRUE
EPI_ISL_718568	2020-12-10	delH69V70,Y145del,N501Y,A570D,D614G,P681H,T716I,S982A,A1020V,D1118H	TRUE
EPI_ISL_718565	2020-12-10	delH69V70,Y145del,N501Y,A570D,D614G,P681H,T716I,S982A,D1118H	TRUE
EPI_ISL_718572	2020-12-10	delH69V70,Y145del,S494P,N501Y,A570D,D614G,P681H,T716I,S982A,D1118H	TRUE
EPI_ISL_718576	2020-12-10	delH69V70,Y145del,N501Y,A570D,D614G,P681H,T716I,S982A,D1118H	TRUE
EPI_ISL_718567	2020-12-10	delH69V70,Y145del,N501Y,A570D,D614G,P681H,T716I,S982A,D1118H	TRUE
EPI_ISL_718574	2020-12-10	delH69V70,Y145del,N501Y,A570D,D614G,P681H,T716I,S982A,D1118H	TRUE
EPI_ISL_718573	2020-12-10	delH69V70,Y145del,N501Y,A570D,D614G,P681H,T716I,S982A,D1118H	TRUE
EPI_ISL_718570	2020-12-10	delH69V70,Y145del,N501Y,A570D,D614G,P681H,T716I,S982A,D1118H	TRUE
EPI_ISL_718577	2020-12-10	delH69V70,Y145del,N501Y,A570D,D614G,P681H,T716I,S982A,D1118H	TRUE
EPI_ISL_718575	2020-12-10	delH69V70,Y145del,N501Y,A570D,D614G,P681H,T716I,S982A,D1118H	TRUE
EPI_ISL_718581	2020-12-10	delH69V70,Y145del,N501Y,A570D,D614G,P681H,T716I,S940F,S982A,D1118H	TRUE
EPI_ISL_718578	2020-12-10	delH69V70,Y145del,N501Y,A570D,D614G,P681H,T716I,S982A,D1118H	TRUE
EPI_ISL_718588	2020-12-10	delH69V70,Y145del,N501Y,A570D,D614G,P681H,T716I,S982A,D1118H	TRUE
EPI_ISL_718584	2020-12-10	delH69V70,Y145del,N501Y,A570D,D614G,P681H,T716I,S982A,D1118H	TRUE
EPI_ISL_718589	2020-12-10	delH69V70,Y145del,N501Y,A570D,D614G,P681H,T716I,S982A,D1118H	TRUE
EPI_ISL_718585	2020-12-10	delH69V70,Y145del,S494P,N501Y,A570D,D614G,P681H,T716I,S982A,D1118H	TRUE
EPI_ISL_718582	2020-12-10	delH69V70,Y145del,N501Y,A570D,D614G,P681H,T716I,S982A,D1118H	TRUE
EPI_ISL_720833	2020-12-03	delH69V70,Y145del,N501Y,A570D,D614G,P681H,T716I,S982A,D1118H	TRUE
EPI_ISL_720844	2020-12-02	delH69V70,Y145del,N501Y,A570D,D614G,P681H,T716I,S982A,D1118H	TRUE
EPI_ISL_720847	2020-12-02	delH69V70,Y145del,N501Y,A570D,D614G,P681H,T716I,S982A,D1118H	TRUE
EPI_ISL_720851	2020-12-03	delH69V70,Y145del,N501Y,A570D,D614G,P681H,T716I,S982A,D1118H	TRUE
EPI_ISL_720845	2020-12-04	delH69V70,Y145del,H245Y,N501Y,A570D,D614G,P681H,T716I,S982A,D1118H	TRUE
EPI_ISL_720828	2020-12-03	delH69V70,Y145del,N501Y,A570D,D614G,P681H,T716I,S982A,D1118H	TRUE
EPI_ISL_720887	2020-12-02	delH69V70,Y145del,N501Y,A570D,D614G,P681H,T716I,S982A,D1118H	TRUE
EPI_ISL_720852	2020-12-02	delH69V70,Y145del,N501Y,A570D,D614G,P681H,T716I,S982A,D1118H	TRUE
EPI_ISL_720856	2020-12-04	delH69V70,Y145del,N501Y,A570D,D614G,P681H,T716I,S982A,D1118H	TRUE
EPI_ISL_720873	2020-12-02	delH69V70,Y145del,N501Y,A570D,D614G,P681H,T716I,S982A,D1118H	TRUE
EPI_ISL_731503	2020-12-08	delH69V70,Y145del,N501Y,A570D,D614G,P681H,T716I,S982A,D1118H	TRUE
EPI_ISL_720888	2020-12-03	delH69V70,Y145del,N501Y,A570D,D614G,P681H,T716I,S982A,D1118H	TRUE
EPI_ISL_720883	2020-12-02	delH69V70,Y145del,N501Y,A570D,D614G,P681H,T716I,S982A,D1118H	TRUE
EPI_ISL_720875	2020-12-04	L18F,delH69V70,Y145del,N501Y,A570D,D614G,P681H,T716I,S982A,D1118H	TRUE
EPI_ISL_731509	2020-12-09	delH69V70,Y145del,N501Y,A570D,D614G,P681H,T716I,S982A,D1118H	TRUE
EPI_ISL_731518	2020-12-09	delH69V70,Y145del,N501Y,A570D,D614G,P681H,T716I,S982A,D1118H	TRUE
EPI_ISL_731519	2020-12-10	delH69V70,Y145del,N501Y,A570D,D614G,P681H,T716I,S982A,D1118H	TRUE
EPI_ISL_731510	2020-12-09	delH69V70,Y145del,N501Y,A570D,D614G,P681H,T716I,S982A,D1118H	TRUE
EPI_ISL_720881	2020-12-02	delH69V70,Y145del,N501Y,A570D,D614G,P681H,T716I,S982A,D1118H	TRUE
EPI_ISL_731513	2020-12-11	delH69V70,Y145del,N501Y,A570D,D614G,P681H,T716I,S982A,D1118H	TRUE
EPI_ISL_731542	2020-12-09	delH69V70,Y145del,N501Y,A570D,D614G,P681H,T716I,S982A,D1118H	TRUE
EPI_ISL_720893	2020-12-04	delH69V70,Y145del,N501Y,A570D,D614G,P681H,T716I,S982A,D1118H	TRUE
EPI_ISL_731531	2020-12-08	delH69V70,Y145del,N501Y,A570D,D614G,P681H,T716I,S982A,D1118H	TRUE
EPI_ISL_731537	2020-12-11	delH69V70,Y145del,N501Y,A570D,D614G,P681H,T716I,S982A,D1118H	TRUE
EPI_ISL_731521	2020-12-08	delH69V70,Y145del,N501Y,A570D,D614G,P681H,T716I,S982A,D1118H	TRUE
EPI_ISL_731546	2020-12-09	delH69V70,Y145del,N501Y,A570D,D614G,P681H,T716I,S982A,D1118H	TRUE
EPI_ISL_731535	2020-12-09	delH69V70,Y145del,N501Y,A570D,D614G,P681H,T716I,S982A,D1118H	TRUE
EPI_ISL_731541	2020-12-08	delH69V70,Y145del,N501Y,A570D,D614G,P681H,T716I,S982A,D1118H	TRUE
EPI_ISL_756802	2020-12-15	delH69V70,Y145del,N501Y,A570D,D614G,P681H,T716I,S982A,D1118H	TRUE
EPI_ISL_731543	2020-12-09	delH69V70,Y145del,N501Y,A570D,D614G,P681H,T716I,S982A,D1118H	TRUE
EPI_ISL_756800	2020-12-16	delH69V70,Y145del,N501Y,A570D,D614G,P681H,T716I,S982A,D1118H	TRUE
EPI_ISL_736372	2020-12-12	delH69V70,Y145del,N501Y,A570D,D614G,P681H,T716I,S982A,D1118H	TRUE
EPI_ISL_736377	2020-12-11	delH69V70,Y145del,N501Y,A570D,D614G,P681H,T716I,S982A,D1118H	TRUE
EPI_ISL_731555	2020-12-09	delH69V70,Y145del,N501Y,A570D,D614G,P681H,T716I,S982A,D1118H	TRUE
EPI_ISL_756804	2020-12-14	delH69V70,Y145del,N501Y,A570D,D614G,P681H,T716I,S982A,D1118H	TRUE
EPI_ISL_756803	2020-12-16	delH69V70,Y145del,N501Y,A570D,D614G,P681H,T716I,S982A,D1118H	TRUE
EPI_ISL_736375	2020-12-11	delH69V70,Y145del,N501Y,A570D,D614G,P681H,T716I,S982A,D1118H	TRUE
EPI_ISL_756801	2020-12-15	delH69V70,Y145del,N501Y,A570D,D614G,P681H,T716I,S982A,D1118H	TRUE
EPI_ISL_756810	2020-12-15	delH69V70,Y145del,N501Y,A570D,D614G,P681H,T716I,S982A,D1118H	TRUE
EPI_ISL_756806	2020-12-15	delH69V70,Y145del,S494P,N501Y,A570D,D614G,P681H,T716I,S982A,D1118H	TRUE
EPI_ISL_756811	2020-12-15	delH69V70,Y145del,N501Y,A570D,D614G,P681H,T716I,S982A,D1118H	TRUE
EPI_ISL_756805	2020-12-17	delH69V70,Y145del,D287G,N501Y,A570D,D614G,P681H,T716I,S982A,D1118H	TRUE
EPI_ISL_756821	2020-12-15	delH69V70,Y145del,N501Y,A570D,D614G,P681H,T716I,S982A,D1118H	TRUE
EPI_ISL_756807	2020-12-15	delH69V70,Y145del,N501Y,A570D,D614G,P681H,T716I,S982A,D1118H	TRUE
EPI_ISL_756813	2020-12-15	delH69V70,P139L,Y145del,N501Y,A570D,D614G,P681H,T716I,S982A,D1118H	TRUE
EPI_ISL_756808	2020-12-14	delH69V70,Y145del,N501Y,A570D,D614G,P681H,T716I,S982A,D1118H	TRUE
EPI_ISL_756823	2020-12-14	delH69V70,Y145del,N501Y,A570D,D614G,P681H,T716I,S982A,D1118H	TRUE
EPI_ISL_756827	2020-12-15	delH69V70,Y145del,N501Y,A570D,D614G,P681H,T716I,S982A,D1118H	TRUE
EPI_ISL_756815	2020-12-15	delH69V70,Y145del,N501Y,A570D,D614G,P681H,T716I,S982A,D1118H	TRUE
EPI_ISL_756814	2020-12-15	delH69V70,Y145del,N501Y,A570D,D614G,P681H,T716I,S982A,D1118H	TRUE
EPI_ISL_756809	2020-12-15	delH69V70,Y145del,N501Y,A570D,D614G,P681H,T716I,S982A,D1118H	TRUE
EPI_ISL_756812	2020-12-15	delH69V70,Y145del,N501Y,A570D,D614G,P681H,T716I,S982A,D1118H	TRUE
EPI_ISL_756832	2020-12-15	delH69V70,Y145del,N501Y,A570D,D614G,P681H,T716I,S982A,D1118H	TRUE
EPI_ISL_756819	2020-12-15	delH69V70,P82L,Y145del,N501Y,A570D,D614G,P681H,T716I,S982A,D1118H	TRUE
EPI_ISL_756829	2020-12-15	delH69V70,Y145del,N501Y,A570D,D614G,P681H,T716I,S982A,D1118H	TRUE
EPI_ISL_756839	2020-12-15	delH69V70,Y145del,N501Y,A570D,D614G,P681H,T716I,S982A,D1118H	TRUE
EPI_ISL_756831	2020-12-15	delH69V70,Y145del,N501Y,A570D,D614G,P681H,T716I,S982A,D1118H	TRUE
EPI_ISL_756830	2020-12-15	delH69V70,Y145del,N501Y,A570D,D614G,P681H,T716I,S982A,D1118H	TRUE
EPI_ISL_756838	2020-12-15	delH69V70,Y145del,N501Y,A570D,D614G,P681H,T716I,S982A,D1118H	TRUE
EPI_ISL_756833	2020-12-15	delH69V70,Y145del,N501Y,A570D,D614G,P681H,T716I,S982A,D1118H	TRUE
EPI_ISL_756834	2020-12-15	T22I,delH69V70,Y145del,N501Y,A570D,D614G,P681H,T716I,S982A,D1118H	TRUE
EPI_ISL_756826	2020-12-15	delH69V70,Y145del,N501Y,A570D,D614G,P681H,T716I,S982A,D1118H	TRUE
EPI_ISL_756840	2020-12-17	delH69V70,Y145del,N501Y,A570D,D614G,P681H,T716I,S982A,D1118H	TRUE
EPI_ISL_756896	2020-12-15	delH69V70,Y145del,N501Y,A570D,D614G,P681H,T716I,S982A,D1118H	TRUE
EPI_ISL_756845	2020-12-15	delH69V70,Y145del,N501Y,A570D,D614G,P681H,T716I,S982A,D1118H	TRUE
EPI_ISL_756836	2020-12-15	delH69V70,Y145del,N501Y,A570D,D614G,P681H,T716I,S982A,D1118H	TRUE
EPI_ISL_761304	2020-12-17	delH69V70,Y145del,N501Y,A570D,D614G,P681H,T716I,S982A,D1118H	TRUE
EPI_ISL_756898	2020-12-15	delH69V70,Y145del,N501Y,A570D,D614G,P681H,T716I,S982A,D1118H	TRUE
EPI_ISL_761357	2020-12-16	delH69V70,Y145del,N501Y,A570D,D614G,P681H,T716I,S982A,D1118H	TRUE
EPI_ISL_756842	2020-12-15	delH69V70,Y145del,N501Y,A570D,D614G,P681H,T716I,S982A,D1118H	TRUE
EPI_ISL_761358	2020-12-18	delH69V70,Y145del,N501Y,A570D,D614G,P681H,T716I,S982A,D1118H	TRUE
EPI_ISL_756894	2020-12-16	delH69V70,Y145del,N501Y,A570D,D614G,P681H,T716I,S982A,D1118H	TRUE
EPI_ISL_761359	2020-12-18	delH69V70,Y145del,N501Y,A570D,D614G,P681H,T716I,S982A,D1118H	TRUE
EPI_ISL_761360	2020-12-17	delH69V70,Y145del,N501Y,A570D,D614G,P681H,T716I,S982A,D1118H	TRUE
EPI_ISL_761361	2020-12-18	delH69V70,Y145del,N501Y,A570D,D614G,P681H,T716I,S982A,D1118H	TRUE
EPI_ISL_761364	2020-12-18	delH69V70,Y145del,N501Y,A570D,D614G,P681H,T716I,S982A,D1118H	TRUE
EPI_ISL_761366	2020-12-16	delH69V70,Y145del,N501Y,A570D,D614G,P681H,T716I,S982A,D1118H	TRUE
EPI_ISL_761362	2020-12-18	delH69V70,S98F,Y145del,N501Y,A570D,D614G,P681H,T716I,S982A,D1118H	TRUE
EPI_ISL_761365	2020-12-16	delH69V70,Y145del,N501Y,A570D,D614G,P681H,T716I,S982A,D1118H	TRUE
EPI_ISL_761363	2020-12-18	delH69V70,Y145del,N501Y,A570D,D614G,P681H,T716I,S982A,D1118H	TRUE
EPI_ISL_761375	2020-12-17	delH69V70,Y145del,N501Y,A570D,D614G,P681H,T716I,S982A,D1118H	TRUE
EPI_ISL_761369	2020-12-17	delH69V70,Y145del,N501Y,A570D,D614G,P681H,T716I,S982A,D1118H	TRUE
EPI_ISL_761367	2020-12-18	delH69V70,Y145del,N501Y,A570D,D614G,P681H,T716I,S982A,D1118H	TRUE
EPI_ISL_761370	2020-12-18	delH69V70,Y145del,N501Y,A570D,D614G,P681H,T716I,S982A,D1118H	TRUE
EPI_ISL_761388	2020-12-18	delH69V70,Y145del,N501Y,A570D,A575S,D614G,P681H,A706V,T716I,S982A,D1118H	TRUE
EPI_ISL_761379	2020-12-18	delH69V70,Y145del,N501Y,A570D,D614G,P681H,T716I,S982A,D1118H	TRUE
EPI_ISL_761382	2020-12-18	delH69V70,Y145del,N501Y,A570D,D614G,P681H,T716I,S982A,D1118H	TRUE
EPI_ISL_761376	2020-12-17	delH69V70,Y145del,N501Y,A570D,D614G,P681H,T716I,S982A,D1118H	TRUE
EPI_ISL_761378	2020-12-18	delH69V70,Y145del,N501Y,A570D,D614G,P681H,T716I,S982A,D1118H	TRUE
EPI_ISL_761374	2020-12-17	delH69V70,Y145del,N501Y,A570D,D614G,P681H,T716I,S982A,D1118H	TRUE
EPI_ISL_761385	2020-12-18	delH69V70,Y145del,N501Y,A570D,D614G,P681H,T716I,S982A,D1118H	TRUE
EPI_ISL_761373	2020-12-18	delH69V70,Y145del,N501Y,A570D,D614G,P681H,T716I,S982A,D1118H	TRUE
EPI_ISL_761387	2020-12-18	delH69V70,Y145del,N501Y,A570D,D614G,P681H,T716I,S982A,D1118H	TRUE
EPI_ISL_761393	2020-12-17	delH69V70,Y145del,N501Y,A570D,D614G,P681H,T716I,S982A,D1118H	TRUE
EPI_ISL_761381	2020-12-18	delH69V70,Y145del,N501Y,A570D,D614G,P681H,T716I,S982A,D1118H	TRUE
EPI_ISL_761390	2020-12-18	delH69V70,Y145del,N501Y,A570D,D614G,P681H,T716I,S982A,D1118H	TRUE
EPI_ISL_761371	2020-12-16	delH69V70,Y145del,N501Y,A570D,D614G,P681H,T716I,S982A,D1118H	TRUE
EPI_ISL_761377	2020-12-18	delH69V70,Y145del,N501Y,A570D,D614G,P681H,T716I,S982A,D1118H	TRUE
EPI_ISL_761386	2020-12-18	delH69V70,Y145del,N501Y,A570D,D614G,P681H,T716I,S982A,D1118H	TRUE
EPI_ISL_761383	2020-12-17	delH69V70,Y145del,N501Y,A570D,D614G,P681H,T716I,S982A,D1118H	TRUE
EPI_ISL_761391	2020-12-18	delH69V70,Y145del,N501Y,A570D,D614G,P681H,T716I,S982A,D1118H	TRUE
EPI_ISL_761398	2020-12-17	delH69V70,Y145del,N501Y,A570D,D614G,P681H,T716I,S982A,D1118H	TRUE
EPI_ISL_762689	2020-12-17	delH69V70,Y145del,N501Y,A570D,D614G,P681H,T716I,S982A,D1118H	TRUE
EPI_ISL_762687	2020-12-18	delH69V70,Y145del,N501Y,A570D,D614G,P681H,T716I,S982A,D1118H	TRUE
EPI_ISL_761394	2020-12-16	delH69V70,Y145del,N501Y,A570D,D614G,P681H,T716I,S982A,D1118H	TRUE
EPI_ISL_761392	2020-12-18	delH69V70,Y145del,N501Y,A570D,D614G,P681H,T716I,S982A,D1118H,M1233I	TRUE
EPI_ISL_762634	2020-12-16	delH69V70,Y145del,N501Y,A570D,D614G,P681H,T716I,S982A,D1118H	TRUE
EPI_ISL_761396	2020-12-18	delH69V70,Y145del,N501Y,A570D,D614G,P681H,T716I,S982A,D1118H	TRUE
EPI_ISL_761395	2020-12-18	delH69V70,Y145del,N501Y,A570D,D614G,P681H,T716I,S982A,D1118H	TRUE
EPI_ISL_761397	2020-12-18	delH69V70,Y145del,N501Y,A570D,D614G,P681H,T716I,S982A,D1118H,V1230L	TRUE
EPI_ISL_762694	2020-12-16	delH69V70,Y145del,N501Y,A570D,D614G,P681H,T716I,S982A,D1118H	TRUE
EPI_ISL_761399	2020-12-18	delH69V70,Y145del,S494P,N501Y,A570D,D614G,P681H,T716I,S982A,D1118H	TRUE
EPI_ISL_762695	2020-12-17	delH69V70,Y145del,N501Y,A570D,D614G,P681H,T716I,S982A,D1118H	TRUE
EPI_ISL_762688	2020-12-17	delH69V70,Y145del,N501Y,A570D,D614G,P681H,T716I,S982A,D1118H	TRUE
EPI_ISL_762690	2020-12-16	delH69V70,Y145del,N501Y,A570D,D614G,P681H,T716I,S982A,D1118H	TRUE
EPI_ISL_762697	2020-12-17	delH69V70,Y145del,N501Y,A570D,D614G,P681H,T716I,S982A,D1118H	TRUE
EPI_ISL_762696	2020-12-17	delH69V70,Y145del,N501Y,A570D,D614G,P681H,T716I,S982A,D1118H	TRUE
EPI_ISL_763965	2020-12-15	delH69V70,Y145del,N501Y,A570D,D614G,P681H,T716I,S982A,D1118H	TRUE
EPI_ISL_762698	2020-12-16	delH69V70,Y145del,N501Y,A570D,D614G,P681H,T716I,S982A,D1118H	TRUE
EPI_ISL_766213	2020-12-07	delH69V70,Y145del,N501Y,A570D,D614G,P681H,T716I,S982A,D1118H	TRUE
EPI_ISL_768805	2020-12-12	delH69V70,Y145del,N501Y,A570D,D614G,P681H,T716I,S982A,D1118H	TRUE
EPI_ISL_768801	2020-12-08	delH69V70,Y145del,N501Y,A570D,D614G,P681H,T716I,S982A,D1118H	TRUE
EPI_ISL_766215	2020-12-16	delH69V70,Y145del,N501Y,A570D,D614G,P681H,T716I,S982A,D1118H	TRUE
EPI_ISL_768872	2020-12-18	delH69V70,Y145del,N501Y,A570D,D614G,P681H,T716I,S982A,D1118H	TRUE
EPI_ISL_768804	2020-12-11	delH69V70,Y145del,N501Y,A570D,D614G,P681H,T716I,S982A,D1118H	TRUE
EPI_ISL_768870	2020-12-18	delH69V70,Y145del,N501Y,A570D,D614G,P681H,T716I,S982A,D1118H	TRUE
EPI_ISL_768800	2020-12-04	delH69V70,Y145del,N501Y,A570D,D614G,P681H,T716I,S982A,D1118H	TRUE
EPI_ISL_768802	2020-12-08	delH69V70,Y145del,N501Y,A570D,D614G,P681H,T716I,S982A,D1118H	TRUE
EPI_ISL_768873	2020-12-18	delH69V70,Y145del,N501Y,A570D,D614G,P681H,T716I,S982A,D1118H	TRUE
EPI_ISL_768877	2020-12-18	delH69V70,Y145del,N501Y,A570D,D614G,P681H,T716I,P812S,S982A,D1118H	TRUE
EPI_ISL_781842	2020-12-18	delH69V70,Y145del,N501Y,A570D,D614G,P681H,T716I,S982A,D1118H	TRUE
EPI_ISL_781843	2020-12-18	delH69V70,Y145del,N501Y,A570D,D614G,P681H,T716I,S982A,D1118H	TRUE
EPI_ISL_768876	2020-12-18	delH69V70,Y145del,N501Y,A570D,D614G,P681H,T716I,S982A,D1118H	TRUE
EPI_ISL_768879	2020-12-17	delH69V70,Y145del,N501Y,A570D,D614G,P681H,T716I,S982A,D1118H	TRUE
EPI_ISL_768875	2020-12-17	delH69V70,Y145del,N501Y,A570D,D614G,P681H,T716I,S982A,D1118H	TRUE
EPI_ISL_768874	2020-12-18	delH69V70,Y145del,N501Y,A570D,D614G,P681H,T716I,S982A,D1118H	TRUE
EPI_ISL_820227	2020-12-14	delH69V70,Y145del,N501Y,A570D,D614G,P681H,T716I,S982A,D1118H	TRUE
EPI_ISL_820222	2020-12-14	delH69V70,Y145del,N501Y,A570D,D614G,P681H,T716I,S982A,D1118H	TRUE
EPI_ISL_781844	2020-12-18	delH69V70,Y145del,N501Y,A570D,D614G,P681H,T716I,S982A,D1118H	TRUE
EPI_ISL_768878	2020-12-18	delH69V70,Y145del,N501Y,A570D,D614G,P681H,T716I,G946V,S982A,D1118H	TRUE
EPI_ISL_820219	2020-12-14	delH69V70,Y145del,N501Y,A570D,D614G,P681H,T716I,S982A,D1118H	TRUE
EPI_ISL_820232	2020-12-14	delH69V70,Y145del,N501Y,A570D,D614G,P681H,T716I,S982A,D1118H	TRUE
EPI_ISL_799972	2020-12-14	delH69V70,Y145del,N501Y,A570D,D614G,P681H,T716I,S982A,D1118H	TRUE
EPI_ISL_820225	2020-12-14	delH69V70,Y145del,N501Y,A570D,D614G,P681H,T716I,S982A,D1118H	TRUE
EPI_ISL_820220	2020-12-14	delH69V70,Y145del,N501Y,A570D,D614G,P681H,T716I,S982A,D1118H	TRUE
EPI_ISL_820237	2020-12-14	delH69V70,Y145del,N501Y,A570D,D614G,P681H,T716I,S982A,D1118H	TRUE
EPI_ISL_820239	2020-12-14	delH69V70,Y145del,N501Y,A570D,D614G,P681H,T716I,S982A,D1118H,K1191N	TRUE
EPI_ISL_820230	2020-12-14	delH69V70,Y145del,N501Y,A570D,D614G,P681H,T716I,S982A,D1118H	TRUE
EPI_ISL_820243	2020-12-14	delH69V70,Y145del,N501Y,A570D,D614G,P681H,T716I,S982A,D1118H	TRUE
EPI_ISL_820217	2020-12-14	delH69V70,Y145del,N501Y,A570D,D614G,P681H,T716I,S982A,D1118H	TRUE
EPI_ISL_820240	2020-12-14	delH69V70,Y145del,N501Y,A570D,D614G,P681H,T716I,S982A,D1118H	TRUE
EPI_ISL_820228	2020-12-14	delH69V70,Y145del,N501Y,A570D,D614G,P681H,T716I,S982A,D1118H	TRUE
EPI_ISL_820235	2020-12-14	delH69V70,Y145del,N501Y,A570D,D614G,P681H,T716I,S982A,D1118H	TRUE
EPI_ISL_820265	2020-12-14	delH69V70,Y145del,N501Y,A570D,D614G,P681H,T716I,S982A,D1118H	TRUE
EPI_ISL_820248	2020-12-14	delH69V70,Y145del,N501Y,A570D,D614G,P681H,T716I,S982A,D1118H	TRUE
EPI_ISL_820247	2020-12-14	delH69V70,Y145del,N501Y,A570D,D614G,P681H,T716I,S982A,D1118H	TRUE
EPI_ISL_820270	2020-12-14	V6A,delH69V70,Y145del,N501Y,A570D,D614G,P681H,T716I,S982A,D1118H	TRUE
EPI_ISL_820258	2020-12-14	delH69V70,Y145del,N501Y,A570D,D614G,P681H,T716I,S982A,D1118H	TRUE
EPI_ISL_820267	2020-12-14	delH69V70,T95A,Y145del,N501Y,A570D,D614G,P681H,T716I,S982A,D1118H	TRUE
EPI_ISL_820272	2020-12-14	delH69V70,Y145del,N501Y,A570D,D614G,P681H,T716I,A892V,S982A,D1118H	TRUE
EPI_ISL_820283	2020-12-14	delH69V70,Y145del,N501Y,A570D,D614G,P681H,T716I,S982A,D1118H	TRUE
EPI_ISL_820275	2020-12-14	delH69V70,Y145del,N501Y,A570D,D614G,P681H,T716I,S982A,D1118H	TRUE
EPI_ISL_820260	2020-12-14	delH69V70,Y145del,N501Y,A570D,D614G,P681H,T716I,S982A,D1118H	TRUE
EPI_ISL_820278	2020-12-14	delH69V70,Y145del,N501Y,A570D,D614G,P681H,T716I,S982A,D1118H	TRUE
EPI_ISL_820277	2020-12-14	delH69V70,Y145del,S494P,N501Y,A570D,D614G,P681H,T716I,S982A,D1118H	TRUE
EPI_ISL_629440	2020-10-22	delH69V70,Y145del,N501Y,A570D,D614G,P681H,T716I,S982A,D1118H	TRUE
EPI_ISL_820285	2020-12-14	delH69V70,Y145del,N501Y,A570D,D614G,P681H,T716I,S982A,D1118H	TRUE
EPI_ISL_629446	2020-10-22	delH69V70,Y145del,N501Y,A570D,D614G,P681H,T716I,S982A,D1118H	TRUE
EPI_ISL_820288	2020-12-14	delH69V70,Y145del,N501Y,A570D,D614G,P681H,T716I,S982A,D1118H	TRUE
EPI_ISL_820280	2020-12-14	delH69V70,Y145del,N501Y,A570D,D614G,P681H,T716I,S982A,D1118H	TRUE
EPI_ISL_643682	2020-10-29	delH69V70,Y145del,N501Y,A570D,D614G,P681H,T716I,S982A,D1118H	TRUE
EPI_ISL_643684	2020-10-29	delH69V70,Y145del,N501Y,A570D,D614G,P681H,T716I,S982A,D1118H	TRUE
EPI_ISL_820290	2020-12-14	delH69V70,Y145del,S494P,N501Y,A570D,D614G,P681H,T716I,S982A,D1118H	TRUE
EPI_ISL_655657	2020-11-09	delH69V70,Y145del,N501Y,A570D,D614G,P681H,T716I,S982A,D1118H	TRUE
EPI_ISL_655647	2020-11-09	delH69V70,Y145del,N501Y,A570D,D614G,P681H,T716I,S982A,D1118H	TRUE
EPI_ISL_655653	2020-11-08	delH69V70,Y145del,N501Y,A570D,D614G,P681H,T716I,S982A,D1118H	TRUE
EPI_ISL_820293	2020-12-14	delH69V70,Y145del,N501Y,A570D,D614G,P681H,T716I,S982A,D1118H	TRUE
EPI_ISL_629408	2020-10-21	delH69V70,Y145del,N501Y,A570D,D614G,P681H,T716I,S982A,D1118H	TRUE
EPI_ISL_656994	2020-11-08	delH69V70,Y145del,S221L,N501Y,A570D,D614G,P681H,T716I,S982A,D1118H	TRUE
EPI_ISL_656985	2020-11-08	delH69V70,Y145del,N501Y,A570D,D614G,P681H,A706V,T716I,S982A,D1118H	TRUE
EPI_ISL_656984	2020-11-08	delH69V70,Y145del,N501Y,A570D,E583D,D614G,P681H,T716I,S982A,D1118H	TRUE
EPI_ISL_659292	2020-11-05	delH69V70,Y145del,N501Y,A570D,D614G,P681H,A706V,T716I,S982A,D1118H	TRUE
EPI_ISL_659252	2020-11-05	delH69V70,Y145del,N501Y,A570D,D614G,P681H,T716I,S982A,D1118H	TRUE
EPI_ISL_655676	2020-11-09	delH69V70,Y145del,N501Y,A570D,D614G,P681H,T716I,S982A,D1118H	TRUE
EPI_ISL_655715	2020-11-08	delH69V70,Y145del,N501Y,A570D,D614G,P681H,T716I,S982A,D1118H	TRUE
EPI_ISL_659295	2020-11-05	delH69V70,Y145del,N501Y,A570D,D614G,P681H,T716I,S982A,D1118H	TRUE
EPI_ISL_659294	2020-11-05	delH69V70,Y145del,N501Y,A570D,D614G,P681H,T716I,S982A,D1118H	TRUE
EPI_ISL_661581	2020-11-10	delH69V70,Y145del,N501Y,A570D,D614G,P681H,T716I,S982A,D1118H	TRUE
EPI_ISL_659251	2020-11-05	delH69V70,Y145del,N501Y,A570D,D614G,P681H,T716I,S982A,D1118H	TRUE
EPI_ISL_659256	2020-11-05	delH69V70,Y145del,N501Y,A570D,D614G,P681H,T716I,S982A,D1118H	TRUE
EPI_ISL_673560	2020-11-15	delH69V70,Y145del,N501Y,A570D,D614G,P681H,T716I,S982A,D1118H	TRUE
EPI_ISL_673553	2020-11-15	delH69V70,Y145del,N501Y,A570D,D614G,P681H,T716I,S982A,D1118H	TRUE
EPI_ISL_673546	2020-11-15	delH69V70,Y145del,N501Y,A570D,D614G,P681H,T716I,S982A,D1118H	TRUE
EPI_ISL_673578	2020-11-15	delH69V70,Y145del,N501Y,A570D,D614G,P681H,T716I,S982A,D1118H	TRUE
EPI_ISL_673572	2020-11-15	delH69V70,Y145del,N501Y,A570D,D614G,P681H,T716I,S982A,D1118H	TRUE
EPI_ISL_673591	2020-11-15	delH69V70,Y145del,N501Y,A570D,D614G,P681H,T716I,S982A,D1118H	TRUE
EPI_ISL_673586	2020-11-15	delH69V70,Y145del,N501Y,A570D,D614G,P681H,T716I,S982A,D1118H	TRUE
EPI_ISL_673598	2020-11-15	delH69V70,Y145del,N501Y,A570D,D614G,P681H,T716I,S982A,D1118H	TRUE
EPI_ISL_674888	2020-11-14	delH69V70,Y145del,N501Y,A570D,D614G,P681H,T716I,S982A,D1118H	TRUE
EPI_ISL_673592	2020-11-13	delH69V70,Y145del,N501Y,A570D,D614G,P681H,T716I,S982A,D1118H	TRUE
EPI_ISL_679608	2020-11-24	delH69V70,N501Y,A570D,D614G,P681H,T716I,S982A,D1118H	TRUE
EPI_ISL_679601	2020-11-24	delH69V70,Y145del,N501Y,A570D,D614G,P681H,T716I,S939F,S982A,D1118H	TRUE
EPI_ISL_679615	2020-11-29	delH69V70,Y145del,N501Y,A570D,D614G,P681H,T716I,S982A,D1118H	TRUE
EPI_ISL_679617	2020-11-27	delH69V70,Y145del,N501Y,A570D,D614G,P681H,T716I,S982A,D1118H	TRUE
EPI_ISL_701706	2020-11-20	delH69V70,Y145del,N501Y,A570D,D614G,P681H,T716I,S982A,D1118H	TRUE
EPI_ISL_679616	2020-11-27	delH69V70,Y145del,N501Y,A570D,D614G,P681H,T716I,S982A,D1118H	TRUE
EPI_ISL_679613	2020-11-25	delH69V70,Y145del,N501Y,A570D,D614G,P681H,T716I,S982A,D1118H	TRUE
EPI_ISL_701776	2020-11-21	delH69V70,Y145del,N501Y,A570D,D614G,P681H,T716I,S982A,D1118H	TRUE
EPI_ISL_679641	2020-11-01	delH69V70,Y145del,N501Y,A570D,D614G,P681H,T716I,S982A,D1118H	TRUE
EPI_ISL_679612	2020-11-26	delH69V70,Y145del,N501Y,A570D,D614G,P681H,T716I,S982A,D1118H	TRUE
EPI_ISL_701722	2020-11-19	A27T,delH69V70,Y145del,N501Y,A570D,D614G,P681H,T716I,S982A,D1118H	TRUE
EPI_ISL_679619	2020-11-27	delH69V70,Y145del,N501Y,A570D,D614G,P681H,T716I,S982A,D1118H	TRUE
EPI_ISL_731567	2020-12-10	delH69V70,Y145del,N501Y,A570D,D614G,P681H,T716I,S982A,D1118H	TRUE
EPI_ISL_718599	2020-12-10	delH69V70,Y145del,N501Y,A570D,D614G,P681H,T716I,S982A,D1118H	TRUE
EPI_ISL_701782	2020-11-20	delH69V70,Y145del,N501Y,A570D,D614G,P681H,T716I,S982A,D1118H	TRUE
EPI_ISL_731580	2020-12-08	delH69V70,Y145del,N501Y,A570D,D614G,P681H,T716I,S982A,D1118H	TRUE
EPI_ISL_718591	2020-12-10	delH69V70,Y145del,N501Y,A570D,D614G,P681H,T716I,S982A,D1118H	TRUE
EPI_ISL_731573	2020-12-10	delH69V70,Y145del,N501Y,A570D,D614G,P681H,T716I,S982A,D1118H	TRUE
EPI_ISL_701729	2020-11-19	delH69V70,Y145del,N501Y,A570D,D614G,P681H,T716I,S982A,D1118H	TRUE
EPI_ISL_718596	2020-12-10	delH69V70,Y145del,N501Y,A570D,D614G,P681H,T716I,S982A,D1118H	TRUE
EPI_ISL_731578	2020-12-10	delH69V70,Y145del,N501Y,A570D,D614G,P681H,T716I,S982A,D1118H	TRUE
EPI_ISL_718590	2020-12-10	delH69V70,Y145del,R214L,N501Y,A570D,D614G,P681H,T716I,S982A,D1118H	TRUE
EPI_ISL_731584	2020-12-09	delH69V70,Y145del,N501Y,A570D,D614G,P681H,T716I,S982A,D1118H	TRUE
EPI_ISL_718597	2020-12-10	delH69V70,Y145del,N501Y,A570D,D614G,P681H,T716I,S982A,D1118H	TRUE
EPI_ISL_718593	2020-12-10	delH69V70,Y145del,N501Y,A570D,D614G,P681H,T716I,S982A,D1118H	TRUE
EPI_ISL_731565	2020-12-09	delH69V70,Y145del,N501Y,A570D,D614G,P681H,T716I,S982A,D1118H	TRUE
EPI_ISL_736405	2020-12-11	delH69V70,Y145del,N501Y,A570D,D614G,P681H,T716I,S982A,D1118H	TRUE
EPI_ISL_736400	2020-12-11	delH69V70,Y145del,N501Y,A570D,D614G,P681H,T716I,S982A,D1118H	TRUE
EPI_ISL_731581	2020-12-10	delH69V70,Y145del,N501Y,A570D,D614G,P681H,T716I,S982A,D1118H	TRUE
EPI_ISL_731588	2020-12-09	delH69V70,Y145del,S494P,N501Y,A570D,D614G,P681H,T716I,S982A,D1118H	TRUE
EPI_ISL_731585	2020-12-09	delH69V70,Y145del,N501Y,A570D,D614G,P681H,T716I,S982A,D1118H	TRUE
EPI_ISL_736401	2020-12-12	delH69V70,Y145del,N501Y,A570D,D614G,P681H,T716I,S982A,D1118H	TRUE
EPI_ISL_736448	2020-12-11	delH69V70,Y145del,N501Y,A570D,D614G,P681H,T716I,S982A,D1118H	TRUE
EPI_ISL_754251	2020-12-03	delH69V70,Y145del,N501Y,A570D,D614G,P681H,T716I,S982A,D1118H	TRUE
EPI_ISL_754247	2020-11-29	delH69V70,Y145del,N501Y,A570D,D614G,P681H,T716I,S982A,D1118H	TRUE
EPI_ISL_736402	2020-12-11	delH69V70,Y145del,N501Y,A570D,D614G,P681H,T716I,S982A,D1118H	TRUE
EPI_ISL_736407	2020-12-11	delH69V70,Y145del,N501Y,A570D,D614G,P681H,T716I,S982A,D1118H	TRUE
EPI_ISL_736406	2020-12-11	delH69V70,Y145del,N501Y,A570D,D614G,P681H,T716I,S982A,D1118H	TRUE
EPI_ISL_754249	2020-12-02	delH69V70,Y145del,N501Y,A570D,D614G,P681H,T716I,S982A,D1118H	TRUE
EPI_ISL_754250	2020-12-02	delH69V70,Y145del,N501Y,A570D,D614G,P681H,T716I,S982A,D1118H	TRUE
EPI_ISL_754256	2020-12-03	delH69V70,Y145del,N501Y,A570D,D614G,P681H,T716I,S982A,D1118H	TRUE
EPI_ISL_754252	2020-12-04	delH69V70,Y145del,N501Y,A570D,D614G,P681H,T716I,S982A,D1118H	TRUE
EPI_ISL_754257	2020-11-27	delH69V70,Y145del,N501Y,A570D,D614G,P681H,T716I,S982A,D1118H	TRUE
EPI_ISL_754259	2020-12-03	delH69V70,Y145del,N501Y,A570D,D614G,P681H,T716I,S982A,D1118H	TRUE
EPI_ISL_754253	2020-12-04	delH69V70,Y145del,Q414L,N501Y,A570D,D614G,P681H,T716I,S982A,D1118H	TRUE
EPI_ISL_754260	2020-12-02	delH69V70,Y145del,N501Y,A570D,D614G,P681H,T716I,S982A,D1118H	TRUE
EPI_ISL_754258	2020-12-02	delH69V70,Y145del,N501Y,A570D,D614G,P681H,T716I,S982A,D1118H	TRUE
EPI_ISL_754263	2020-12-04	delH69V70,Y145del,N501Y,A570D,D614G,P681H,T716I,S982A,D1118H	TRUE
EPI_ISL_754261	2020-12-04	delH69V70,Y145del,N501Y,A570D,D614G,P681H,T716I,S982A,D1118H	TRUE
EPI_ISL_754262	2020-12-03	delH69V70,Y145del,N501Y,A570D,D614G,P681H,T716I,S982A,D1118H	TRUE
EPI_ISL_754265	2020-12-05	delH69V70,Y145del,N501Y,A570D,D614G,P681H,T716I,S982A,D1118H	TRUE
EPI_ISL_756846	2020-12-13	delH69V70,Y145del,N501Y,A570D,D614G,P681H,T716I,S982A,D1118H	TRUE
EPI_ISL_754264	2020-12-05	delH69V70,Y145del,N501Y,A570D,D614G,P681H,T716I,S982A,D1118H	TRUE
EPI_ISL_756847	2020-12-15	delH69V70,Y145del,N501Y,A570D,D614G,P681H,T716I,S982A,D1118H	TRUE
EPI_ISL_754275	2020-12-08	delH69V70,Y145del,N501Y,A570D,D614G,P681H,T716I,S982A,D1118H	TRUE
EPI_ISL_754268	2020-12-18	delH69V70,Y145del,N501Y,A570D,D614G,P681H,T716I,S982A,D1118H	TRUE
EPI_ISL_756851	2020-12-15	delH69V70,Y145del,N501Y,A570D,D614G,P681H,T716I,S982A,D1118H	TRUE
EPI_ISL_754248	2020-12-01	delH69V70,Y145del,N501Y,A570D,D614G,P681H,T716I,S982A,D1118H	TRUE
EPI_ISL_756852	2020-12-16	delH69V70,Y145del,N501Y,A570D,D614G,P681H,T716I,S982A,D1118H	TRUE
EPI_ISL_756853	2020-12-15	delH69V70,Y145del,N501Y,A570D,D614G,P681H,T716I,S982A,D1118H	TRUE
EPI_ISL_756849	2020-12-16	delH69V70,Y145del,N501Y,A570D,D614G,P681H,T716I,S982A,D1118H	TRUE
EPI_ISL_756855	2020-12-15	delH69V70,Y145del,N501Y,A570D,D614G,P681H,T716I,S982A,D1118H	TRUE
EPI_ISL_756856	2020-12-15	delH69V70,Y145del,N501Y,A570D,D614G,P681H,T716I,S982A,D1118H	TRUE
EPI_ISL_756861	2020-12-16	delH69V70,Y145del,N501Y,A570D,D614G,P681H,T716I,S982A,D1118H	TRUE
EPI_ISL_756848	2020-12-15	delH69V70,Y145del,N501Y,A570D,D614G,P681H,T716I,S982A,D1118H	TRUE
EPI_ISL_756859	2020-12-15	delH69V70,Y145del,N501Y,A570D,D614G,P681H,T716I,S982A,D1118H	TRUE
EPI_ISL_756862	2020-12-15	delH69V70,Y145del,S494P,N501Y,A570D,D614G,P681H,T716I,S982A,D1118H	TRUE
EPI_ISL_756858	2020-12-15	delH69V70,Y145del,N501Y,A570D,D614G,P681H,T716I,S982A,D1118H	TRUE
EPI_ISL_756866	2020-12-15	delH69V70,Y145del,S494P,N501Y,A570D,D614G,P681H,T716I,S982A,D1118H	TRUE
EPI_ISL_756864	2020-12-15	delH69V70,Y145del,N501Y,A570D,D614G,P681H,T716I,S982A,D1118H	TRUE
EPI_ISL_756869	2020-12-15	delH69V70,Y145del,N501Y,A570D,D614G,P681H,T716I,S982A,D1118H	TRUE
EPI_ISL_756877	2020-12-16	delH69V70,Y145del,N501Y,A570D,D614G,P681H,T716I,S982A,D1118H	TRUE
EPI_ISL_756876	2020-12-01	delH69V70,Y145del,N501Y,A570D,D614G,P681H,T716I,S982A,D1118H	TRUE
EPI_ISL_756874	2020-12-15	delH69V70,Y145del,N501Y,A570D,D614G,P681H,T716I,S982A,D1118H	TRUE
EPI_ISL_756867	2020-12-16	delH69V70,Y145del,N501Y,A570D,D614G,P681H,T716I,S982A,D1118H	TRUE
EPI_ISL_756881	2020-12-16	delH69V70,Y145del,N501Y,A570D,D614G,P681H,T716I,S982A,D1118H	TRUE
EPI_ISL_756870	2020-12-15	delH69V70,Y145del,N501Y,A570D,D614G,P681H,T716I,S982A,D1118H	TRUE
EPI_ISL_756882	2020-12-15	delH69V70,Y145del,N501Y,A570D,D614G,P681H,T716I,S982A,D1118H	TRUE
EPI_ISL_756878	2020-12-16	delH69V70,Y145del,N501Y,A570D,D614G,P681H,T716I,S982A,D1118H	TRUE
EPI_ISL_756887	2020-12-13	delH69V70,Y145del,N501Y,A570D,D614G,P681H,T716I,S982A,D1118H	TRUE
EPI_ISL_762700	2020-12-17	delH69V70,Y145del,N501Y,A570D,D614G,P681H,T716I,S982A,D1118H	TRUE
EPI_ISL_756886	2020-12-16	delH69V70,Y145del,N501Y,A570D,D614G,P681H,T716I,S982A,D1118H	TRUE
EPI_ISL_762704	2020-12-16	delH69V70,Y145del,N501Y,A570D,D614G,P681H,T716I,S982A,D1118H	TRUE
EPI_ISL_756884	2020-12-15	delH69V70,Y145del,N501Y,A570D,D614G,P681H,T716I,S982A,D1118H	TRUE
EPI_ISL_762705	2020-12-17	delH69V70,Y145del,N501Y,A570D,D614G,P681H,T716I,S982A,D1118H	TRUE
EPI_ISL_762707	2020-12-16	delH69V70,Y145del,N501Y,A570D,D614G,P681H,T716I,S982A,D1118H	TRUE
EPI_ISL_756890	2020-12-14	delH69V70,Y145del,N501Y,A570D,D614G,P681H,T716I,S982A,D1118H	TRUE
EPI_ISL_756883	2020-12-15	delH69V70,Y145del,N501Y,A570D,D614G,P681H,T716I,S982A,D1118H	TRUE
EPI_ISL_756892	2020-12-15	delH69V70,Y145del,N501Y,A570D,D614G,P681H,T716I,S982A,D1118H	TRUE
EPI_ISL_756885	2020-12-17	delH69V70,Y145del,N501Y,A570D,D614G,P681H,T716I,S982A,D1118H	TRUE
EPI_ISL_762709	2020-12-17	delH69V70,Y145del,N501Y,A570D,D614G,P681H,T716I,S982A,D1118H	TRUE
EPI_ISL_762708	2020-12-16	delH69V70,Y145del,N501Y,A570D,D614G,P681H,T716I,S982A,D1118H	TRUE
EPI_ISL_762701	2020-12-16	delH69V70,Y145del,N501Y,A570D,D614G,P681H,A706V,T716I,S982A,D1118H	TRUE
EPI_ISL_756891	2020-12-15	delH69V70,Y145del,N501Y,A570D,D614G,P681H,T716I,S982A,D1118H	TRUE
EPI_ISL_762710	2020-12-16	delH69V70,Y145del,N501Y,A570D,D614G,P681H,T716I,S982A,D1118H	TRUE
EPI_ISL_762712	2020-12-16	delH69V70,Y145del,N501Y,A570D,D614G,P681H,T716I,S982A,D1118H	TRUE
EPI_ISL_756888	2020-12-16	delH69V70,Y145del,N501Y,A570D,D614G,P681H,T716I,S982A,D1118H	TRUE
EPI_ISL_762711	2020-12-16	delH69V70,S98F,Y145del,N501Y,A570D,D614G,P681H,T716I,S982A,D1118H	TRUE
EPI_ISL_762715	2020-12-17	delH69V70,Y145del,N501Y,A570D,D614G,P681H,T716I,S982A,D1118H	TRUE
EPI_ISL_762703	2020-12-16	delH69V70,Y145del,N501Y,A570D,D614G,P681H,T716I,S982A,D1118H	TRUE
EPI_ISL_762702	2020-12-16	delH69V70,Y145del,N501Y,A570D,D614G,P681H,T716I,S982A,D1118H	TRUE
EPI_ISL_762714	2020-12-16	delH69V70,Y145del,N501Y,A570D,D614G,P681H,T716I,S982A,D1118H	TRUE
EPI_ISL_766204	2020-12-15	delH69V70,Y145del,N501Y,A570D,D614G,P681H,T716I,S982A,D1118H	TRUE
EPI_ISL_766227	2020-12-15	delH69V70,Y145del,N501Y,A570D,D614G,P681H,A706V,T716I,S982A,D1118H	TRUE
EPI_ISL_762713	2020-12-17	delH69V70,Y145del,N501Y,A570D,D614G,P681H,T716I,S982A,D1118H	TRUE
EPI_ISL_766202	2020-12-14	delH69V70,Y145del,N501Y,A570D,D614G,P681H,T716I,S982A,D1118H	TRUE
EPI_ISL_766205	2020-12-18	delH69V70,Y145del,N501Y,A570D,D614G,P681H,T716I,S982A,D1118H	TRUE
EPI_ISL_766226	2020-12-12	delH69V70,Y145del,N501Y,A570D,D614G,P681H,T716I,S982A,D1118H	TRUE
EPI_ISL_762718	2020-12-17	delH69V70,Y145del,N501Y,A570D,D614G,P681H,T716I,S982A,D1118H	TRUE
EPI_ISL_766225	2020-12-11	delH69V70,Y145del,N501Y,A570D,D614G,P681H,T716I,S982A,D1118H,V1230L	TRUE
EPI_ISL_766203	2020-12-14	delH69V70,Y145del,N501Y,A570D,D614G,P681H,T716I,S982A,D1118H	TRUE
EPI_ISL_762719	2020-12-17	delH69V70,Y145del,N501Y,A570D,D614G,P681H,T716I,S982A,D1118H	TRUE
EPI_ISL_768841	2020-12-17	L18F,delH69V70,Y145del,N501Y,A570D,D614G,P681H,T716I,S982A,D1118H	TRUE
EPI_ISL_766236	2020-12-17	delH69V70,Y145del,N501Y,A570D,D614G,P681H,T716I,S982A,D1118H	TRUE
EPI_ISL_768845	2020-12-18	delH69V70,Y145del,N501Y,A570D,D614G,P681H,T716I,S982A,D1118H	TRUE
EPI_ISL_766228	2020-12-18	delH69V70,Y145del,N501Y,A570D,D614G,P681H,T716I,S982A,D1118H	TRUE
EPI_ISL_766238	2020-12-11	delH69V70,Y145del,N501Y,A570D,D614G,P681H,T716I,S982A,D1118H	TRUE
EPI_ISL_768843	2020-12-18	L18F,delH69V70,Y145del,N501Y,A570D,D614G,P681H,T716I,S982A,D1118H	TRUE
EPI_ISL_768852	2020-12-18	delH69V70,Y145del,N501Y,A570D,D614G,P681H,T716I,S982A,D1118H	TRUE
EPI_ISL_768846	2020-12-16	delH69V70,Y145del,N501Y,A570D,D614G,P681H,T716I,S982A,D1118H,P1162L	TRUE
EPI_ISL_768851	2020-12-18	delH69V70,Y145del,N501Y,A570D,D614G,P681H,T716I,S982A,D1118H	TRUE
EPI_ISL_768850	2020-12-18	delH69V70,Y145del,N501Y,A570D,D614G,P681H,T716I,S982A,D1118H	TRUE
EPI_ISL_768848	2020-12-18	delH69V70,Y145del,N501Y,A570D,D614G,P681H,T716I,S982A,D1118H	TRUE
EPI_ISL_768847	2020-12-18	delH69V70,Y145del,N501Y,A570D,D614G,P681H,T716I,S982A,D1118H	TRUE
EPI_ISL_768854	2020-12-18	delH69V70,Y145del,N501Y,A570D,D614G,P681H,T716I,S982A,D1118H	TRUE
EPI_ISL_768855	2020-12-18	delH69V70,Y145del,N501Y,A570D,D614G,P681H,T716I,S982A,D1118H	TRUE
EPI_ISL_768857	2020-12-17	delH69V70,Y145del,N501Y,A570D,D614G,P681H,T716I,S982A,D1118H	TRUE
EPI_ISL_768853	2020-12-18	delH69V70,Y145del,N501Y,A570D,D614G,P681H,T716I,S982A,D1118H	TRUE
EPI_ISL_768859	2020-12-18	delH69V70,Y145del,N501Y,A570D,D614G,P681H,T716I,S982A,D1118H	TRUE
EPI_ISL_768865	2020-12-18	delH69V70,Y145del,N501Y,A570D,D614G,P681H,T716I,S982A,D1118H	TRUE
EPI_ISL_768862	2020-12-17	delH69V70,Y145del,N501Y,A570D,D614G,P681H,T716I,S982A,D1118H	TRUE
EPI_ISL_768885	2020-12-18	delH69V70,Y145del,N501Y,A570D,D614G,P681H,T716I,S982A,D1118H	TRUE
EPI_ISL_768884	2020-12-18	delH69V70,Y145del,N501Y,A570D,D614G,P681H,A706V,T716I,S982A,D1118H	TRUE
EPI_ISL_768860	2020-12-18	delH69V70,Y145del,N501Y,A570D,D614G,P681H,T716I,S982A,D1118H	TRUE
EPI_ISL_768867	2020-12-18	delH69V70,Y145del,N501Y,A570D,D614G,P681H,T716I,S982A,D1118H	TRUE
EPI_ISL_768858	2020-12-18	delH69V70,Y145del,N501Y,A570D,D614G,P681H,T716I,S982A,D1118H	TRUE
EPI_ISL_768866	2020-12-18	delH69V70,Y145del,N501Y,A570D,D614G,P681H,T716I,S982A,D1118H	TRUE
EPI_ISL_768864	2020-12-18	delH69V70,Y145del,N501Y,A570D,D614G,P681H,T716I,S982A,D1118H	TRUE
EPI_ISL_768886	2020-12-18	delH69V70,Y145del,N501Y,A570D,D614G,P681H,T716I,S982A,D1118H	TRUE
EPI_ISL_768892	2020-12-18	delH69V70,Y145del,N501Y,A570D,D614G,P681H,T716I,S982A,D1118H	TRUE
EPI_ISL_768861	2020-12-18	delH69V70,Y145del,N501Y,A570D,D614G,P681H,T716I,S982A,D1118H	TRUE
EPI_ISL_768880	2020-12-17	delH69V70,Y145del,N501Y,A570D,D614G,P681H,T716I,S982A,D1118H	TRUE
EPI_ISL_768881	2020-12-18	delH69V70,Y145del,N501Y,A570D,D614G,P681H,T716I,S982A,D1118H	TRUE
EPI_ISL_768893	2020-12-18	delH69V70,Y145del,N501Y,A570D,D614G,P681H,T716I,S982A,D1118H	TRUE
EPI_ISL_768868	2020-12-18	delH69V70,Y145del,N501Y,A570D,D614G,P681H,T716I,S982A,D1118H	TRUE
EPI_ISL_768896	2020-12-18	delH69V70,Y145del,N501Y,A570D,D614G,P681H,T716I,S982A,D1118H	TRUE
EPI_ISL_768869	2020-12-18	delH69V70,Y145del,N501Y,A570D,D614G,P681H,T716I,S982A,D1118H	TRUE
EPI_ISL_768882	2020-12-18	delH69V70,Y145del,N501Y,A570D,D614G,P681H,T716I,S982A,D1118H	TRUE
EPI_ISL_768894	2020-12-18	delH69V70,Y145del,N501Y,A570D,D614G,P681H,A706V,T716I,S982A,D1118H	TRUE
EPI_ISL_768887	2020-12-18	delH69V70,T95I,Y145del,A475V,N501Y,A570D,D614G,P681H,T716I,S982A,D1118H	TRUE
EPI_ISL_768889	2020-12-18	delH69V70,Y145del,N501Y,A570D,D614G,P681H,T716I,S982A,D1118H	TRUE
EPI_ISL_768890	2020-12-18	delH69V70,Y145del,N501Y,A570D,D614G,P681H,T716I,S982A,D1118H	TRUE
EPI_ISL_778210	2020-12-18	delH69V70,Y145del,N501Y,A570D,D614G,P681H,T716I,S982A,D1118H	TRUE
EPI_ISL_768895	2020-12-18	delH69V70,Y145del,N501Y,A570D,D614G,P681H,A706V,T716I,S982A,D1118H	TRUE
EPI_ISL_768897	2020-12-18	delH69V70,Y145del,N501Y,A570D,D614G,P681H,T716I,S982A,D1118H	TRUE
EPI_ISL_778213	2020-12-18	V6A,delH69V70,Y145del,N501Y,A570D,D614G,P681H,T716I,S982A,D1118H	TRUE
EPI_ISL_778200	2020-12-18	delH69V70,Y145del,N501Y,A570D,D614G,P681H,T716I,S982A,D1118H	TRUE
EPI_ISL_778295	2020-12-17	delH69V70,Y145del,N501Y,A570D,D614G,P681H,T716I,S982A,D1118H	TRUE
EPI_ISL_778299	2020-12-14	delH69V70,Y145del,N501Y,A570D,D614G,P681H,T716I,S982A,D1118H	TRUE
EPI_ISL_778271	2020-12-18	delH69V70,Y145del,N501Y,A570D,D614G,P681H,T716I,S982A,D1118H	TRUE
EPI_ISL_778284	2020-12-18	delH69V70,Y145del,N501Y,A570D,D614G,P681H,T716I,S982A,D1118H	TRUE
EPI_ISL_778296	2020-12-16	delH69V70,Y145del,N501Y,A570D,D614G,P681H,T716I,S982A,D1118H	TRUE
EPI_ISL_778282	2020-12-18	delH69V70,Y145del,N501Y,A570D,D614G,P681H,T716I,S982A,D1118H	TRUE
EPI_ISL_778214	2020-12-18	delH69V70,Y145del,N501Y,A570D,D614G,P681H,T716I,S982A,D1118H	TRUE
EPI_ISL_778222	2020-12-18	delH69V70,Y145del,N501Y,A570D,D614G,P681H,T716I,S982A,D1118H	TRUE
EPI_ISL_781809	2020-12-18	delH69V70,Y145del,N501Y,A570D,D614G,P681H,T716I,S982A,D1118H	TRUE
EPI_ISL_778298	2020-12-13	delH69V70,Y145del,N501Y,A570D,D614G,P681H,T716I,S982A,D1118H	TRUE
EPI_ISL_781805	2020-12-18	delH69V70,Y145del,N501Y,A570D,D614G,P681H,T716I,S982A,D1118H	TRUE
EPI_ISL_801039	2020-11-21	delH69V70,L141F,Y145del,A411V,N501Y,A570D,D614G,P681H,T716I,S982A,D1118H	TRUE
EPI_ISL_781892	2020-12-18	delH69V70,Y145del,N501Y,A570D,D614G,P681H,T716I,S982A,D1118H	TRUE
EPI_ISL_781867	2020-12-18	delH69V70,Y145del,N501Y,A570D,D614G,P681H,T716I,S982A,D1118H	TRUE
EPI_ISL_801035	2020-11-22	delH69V70,Y145del,N501Y,A570D,D614G,P681H,T716I,S982A,D1118H	TRUE
EPI_ISL_781848	2020-12-18	delH69V70,Y145del,N501Y,A570D,D614G,P681H,T716I,S982A,D1118H	TRUE
EPI_ISL_781863	2020-12-14	delH69V70,Y145del,N501Y,A570D,D614G,P681H,T716I,S982A,D1118H	TRUE
EPI_ISL_801033	2020-11-22	delH69V70,Y145del,N501Y,A570D,D614G,P681H,T716I,S982A,D1118H	TRUE
EPI_ISL_781822	2020-12-18	delH69V70,Y145del,N501Y,A570D,D614G,P681H,T716I,S982A,D1118H	TRUE
EPI_ISL_801047	2020-11-22	delH69V70,Y145del,N501Y,A570D,D614G,P681H,T716I,S982A,D1118H	TRUE
EPI_ISL_801045	2020-11-22	delH69V70,Y145del,N501Y,A570D,D614G,P681H,T716I,S982A,D1118H	TRUE
EPI_ISL_801069	2020-11-22	delH69V70,Y145del,N501Y,A570D,D614G,P681H,T716I,S982A,D1118H	TRUE
EPI_ISL_801050	2020-11-22	delH69V70,Y145del,N501Y,A570D,D614G,P681H,T716I,S982A,D1118H	TRUE
EPI_ISL_801064	2020-11-21	delH69V70,Y145del,N501Y,A570D,D614G,P681H,T716I,S982A,D1118H	TRUE
EPI_ISL_801066	2020-11-22	delH69V70,Y145del,N501Y,A570D,D614G,P681H,T716I,S982A,D1118H	TRUE
EPI_ISL_801054	2020-11-22	delH69V70,Y145del,N501Y,A570D,D614G,P681H,T716I,S982A,D1118H	TRUE
EPI_ISL_801067	2020-11-22	delH69V70,Y145del,D287G,N501Y,A570D,D614G,P681H,T716I,S982A,D1118H	TRUE
EPI_ISL_801046	2020-11-22	delH69V70,Y145del,N501Y,A570D,D614G,P681H,T716I,S982A,D1118H	TRUE
EPI_ISL_801065	2020-11-22	delH69V70,Y145del,N501Y,A570D,D614G,P681H,T716I,S982A,D1118H	TRUE
EPI_ISL_801068	2020-11-22	delH69V70,Y145del,N501Y,A570D,D614G,P681H,T716I,S982A,D1118H	TRUE
EPI_ISL_801072	2020-11-22	delH69V70,Y145del,N501Y,A570D,D614G,P681H,T716I,S982A,D1118H	TRUE
EPI_ISL_801057	2020-11-23	delH69V70,Y145del,N501Y,A570D,D614G,P681H,T716I,S982A,D1118H	TRUE
EPI_ISL_801091	2020-11-22	delH69V70,Y145del,N501Y,A570D,D614G,P681H,T716I,S982A,D1118H	TRUE
EPI_ISL_801090	2020-11-22	delH69V70,Y145del,N501Y,A570D,D614G,P681H,T716I,S982A,D1118H	TRUE
EPI_ISL_801073	2020-11-22	delH69V70,Y145del,N501Y,A570D,D614G,P681H,T716I,S982A,D1118H	TRUE
EPI_ISL_801077	2020-11-22	delH69V70,Y145del,N501Y,A570D,D614G,P681H,T716I,S982A,D1118H	TRUE
EPI_ISL_801084	2020-11-22	delH69V70,Y145del,N501Y,A570D,D614G,P681H,T716I,S982A,D1118H	TRUE
EPI_ISL_801092	2020-11-22	delH69V70,Y145del,N501Y,A570D,D614G,P681H,T716I,S982A,D1118H	TRUE
EPI_ISL_801080	2020-11-22	delH69V70,Y145del,N501Y,A570D,D614G,P681H,T716I,S982A,D1118H,D1146Y	TRUE
EPI_ISL_801095	2020-11-22	delH69V70,Y145del,N501Y,A570D,D614G,P681H,T716I,S982A,D1118H	TRUE
EPI_ISL_801102	2020-11-22	delH69V70,Y145del,N501Y,A570D,D614G,P681H,T716I,S982A,D1118H	TRUE
EPI_ISL_801082	2020-11-22	delH69V70,Y145del,N501Y,A570D,D614G,P681H,T716I,S982A,D1118H	TRUE
EPI_ISL_801107	2020-11-22	delH69V70,Y145del,N501Y,A570D,D614G,P681H,T716I,S982A,D1118H	TRUE
EPI_ISL_801130	2020-11-23	delH69V70,Y145del,N501Y,A570D,D614G,P681H,T716I,S982A,D1118H	TRUE
EPI_ISL_801146	2020-11-22	delH69V70,Y145del,N501Y,A570D,D614G,P681H,T716I,S982A,D1118H	TRUE
[truncated: 161,784 more rows]

[truncated: 1 more sheets: England COG pillar 2 @ Fig. S1]
